# Supplementary material for: Bonding and Reactivity of a Pair of Neutral and Cationic Heterobimetallic RuZn2 Complexes
Source: PubMed Central journal article supplement (PMC8730504; doi:10.1021/acs.inorgchem.1c02072), 2021-10-18
Supplement: ic1c02072_si_001.pdf [file ic1c02072_si_001.pdf]

## SUPPORTING INFORMATION

### **Bonding and Reactivity of a Pair of Neutral and Cationic Heterobimetallic RuZn<sub>2</sub> Complexes**

Fedor M. Miloserdov, Anne-Frédérique Pécharman, Lia Sotorrios, Nasir A. Rajabi, John P.

Lowe, Stuart A. Macgregor, Mary F. Mahon and Michael K. Whittlesey

*Department of Chemistry, University of Bath, Claverton Down, Bath BA2 7AY, U.K., Institute of  
Chemical Sciences, Heriot-Watt University, Edinburgh EH14 4AS, U.K. and Laboratory of  
Organic Chemistry, Wageningen University, Stippeneng 4, Wageningen 6708 WE, The  
Netherlands*

## Table of Contents

|     |                             |     |
|-----|-----------------------------|-----|
| S-1 | NMR spectra .....           | S2  |
| S-2 | Computational Studies ..... | S41 |
| S-3 | Computed Geometries .....   | S56 |
| S-4 | References .....            | S74 |

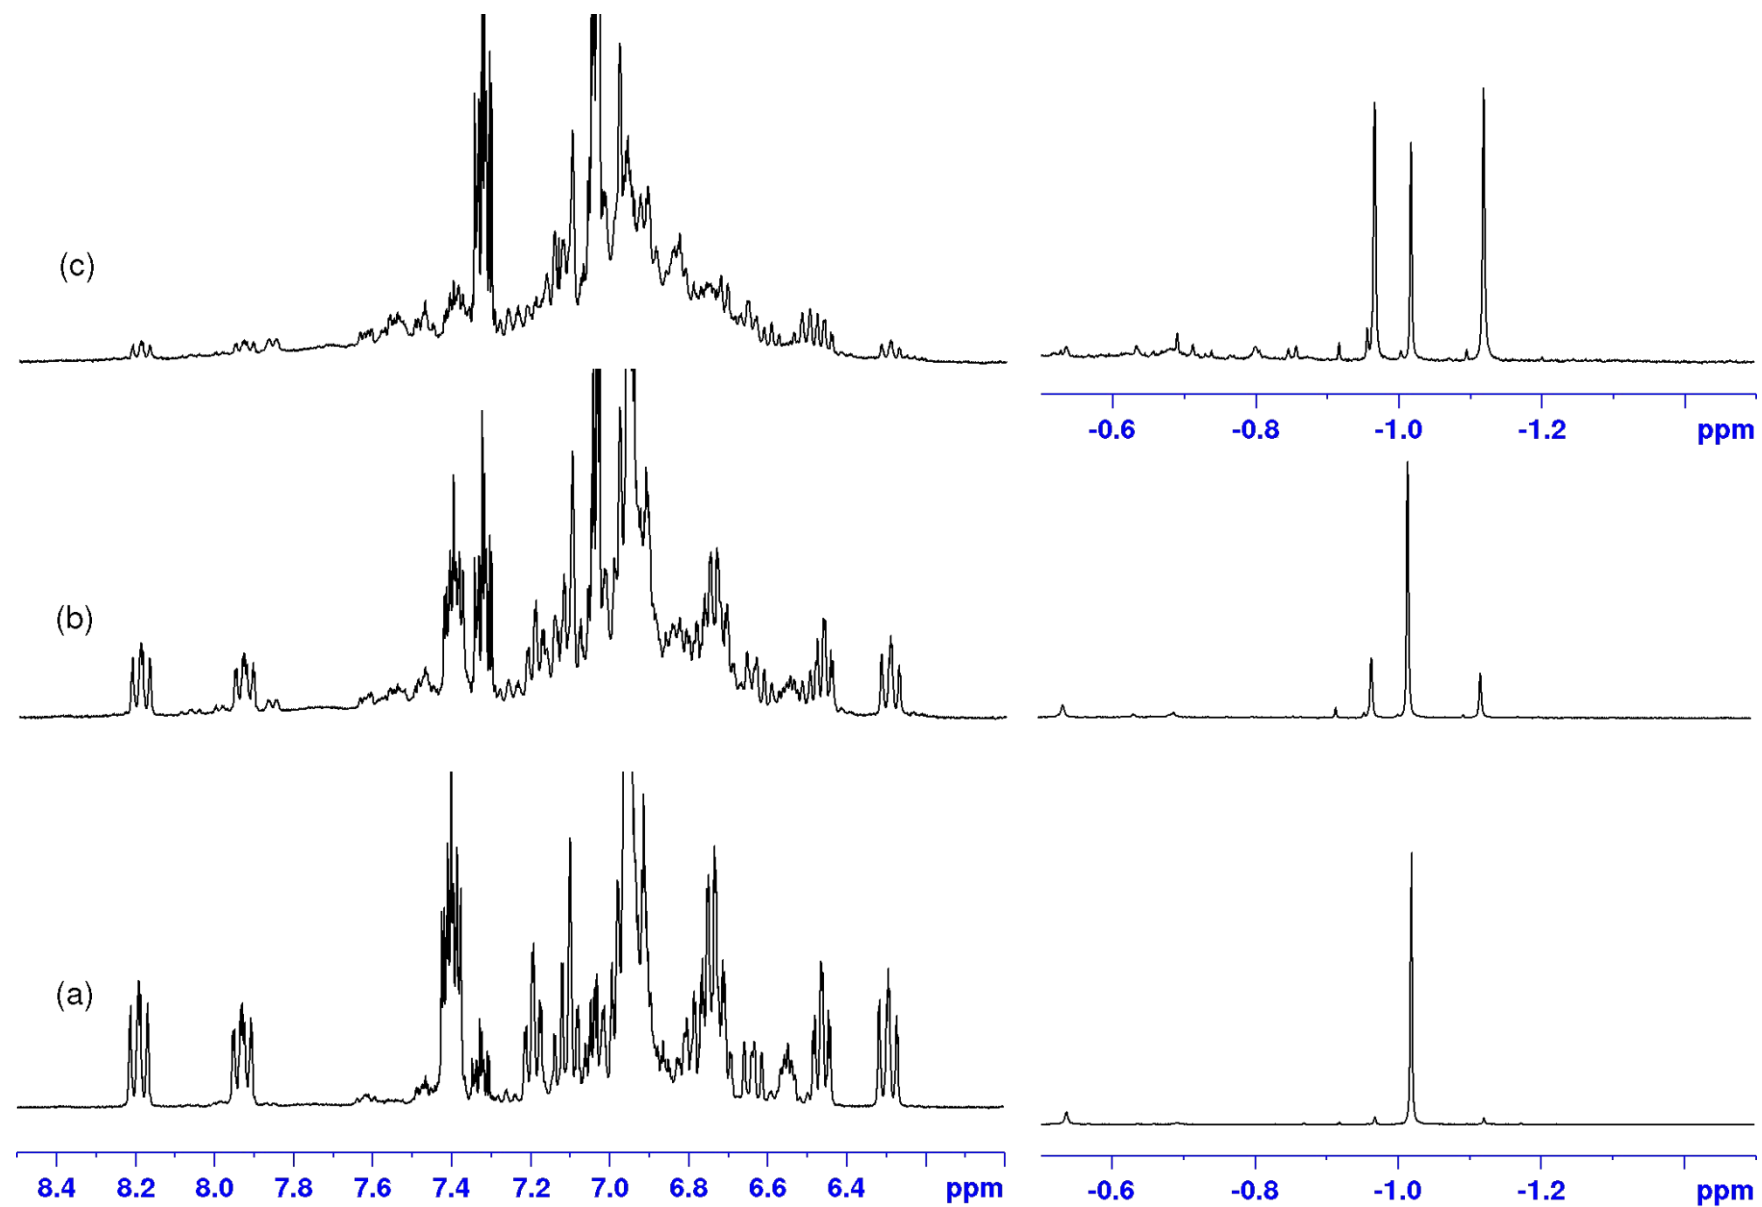

**Figure S1.**  $^1\text{H}$  NMR spectra (400 MHz, 298 K) upon heating  $[\text{Ru}(\text{PPh}_3)(\text{C}_6\text{H}_4\text{PPh}_2)_2(\text{ZnMe})_2]$  (**2**) in  $\text{C}_6\text{D}_5\text{CD}_3$  at  $80^\circ\text{C}$  for (a) 2 h, (b) 11 h and (c) 30 h.

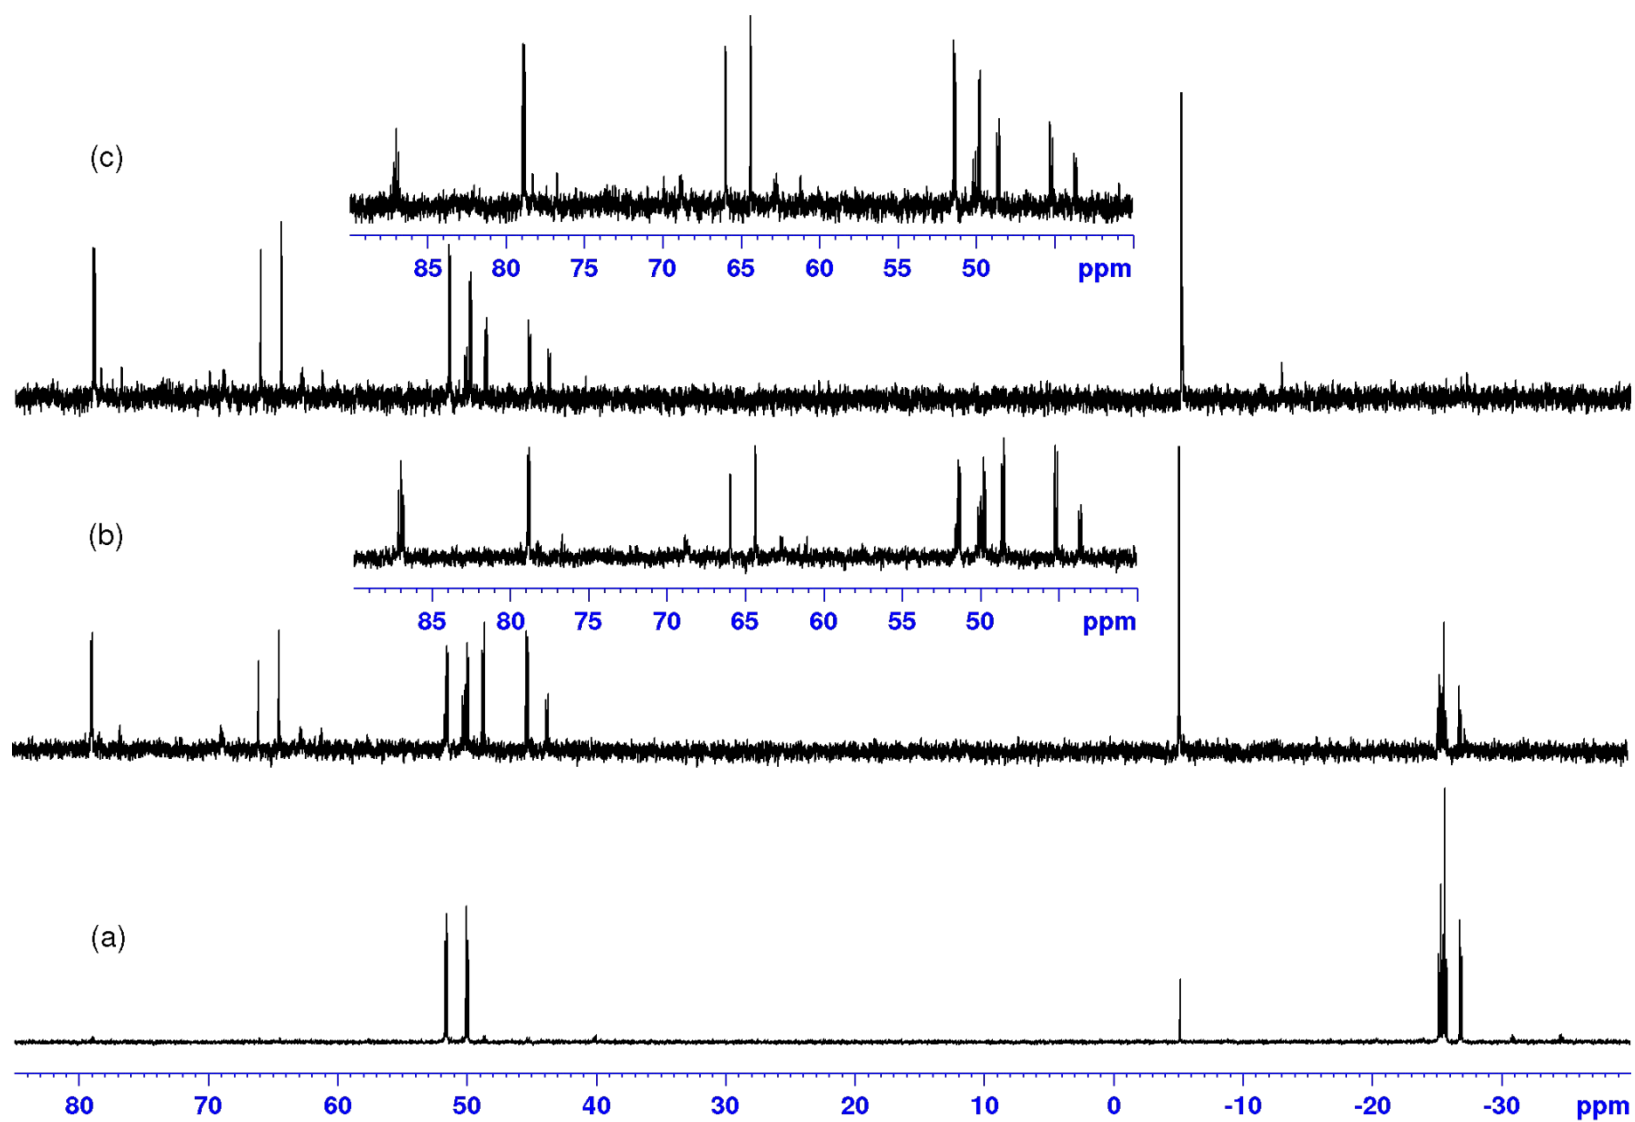

**Figure S2.**  $^{31}\text{P}\{^1\text{H}\}$  NMR spectra (162 MHz, 298 K) upon heating  $[\text{Ru}(\text{PPh}_3)(\text{C}_6\text{H}_4\text{PPh}_2)_2(\text{ZnMe})_2]$  (**2**) in  $\text{C}_6\text{D}_5\text{CD}_3$  at 80 °C for (a) 2 h, (b) 30 h and (c) 55 h. Insets of high frequency regions shown in (b) and (c) - see Figures S3 and S4 for assignments.

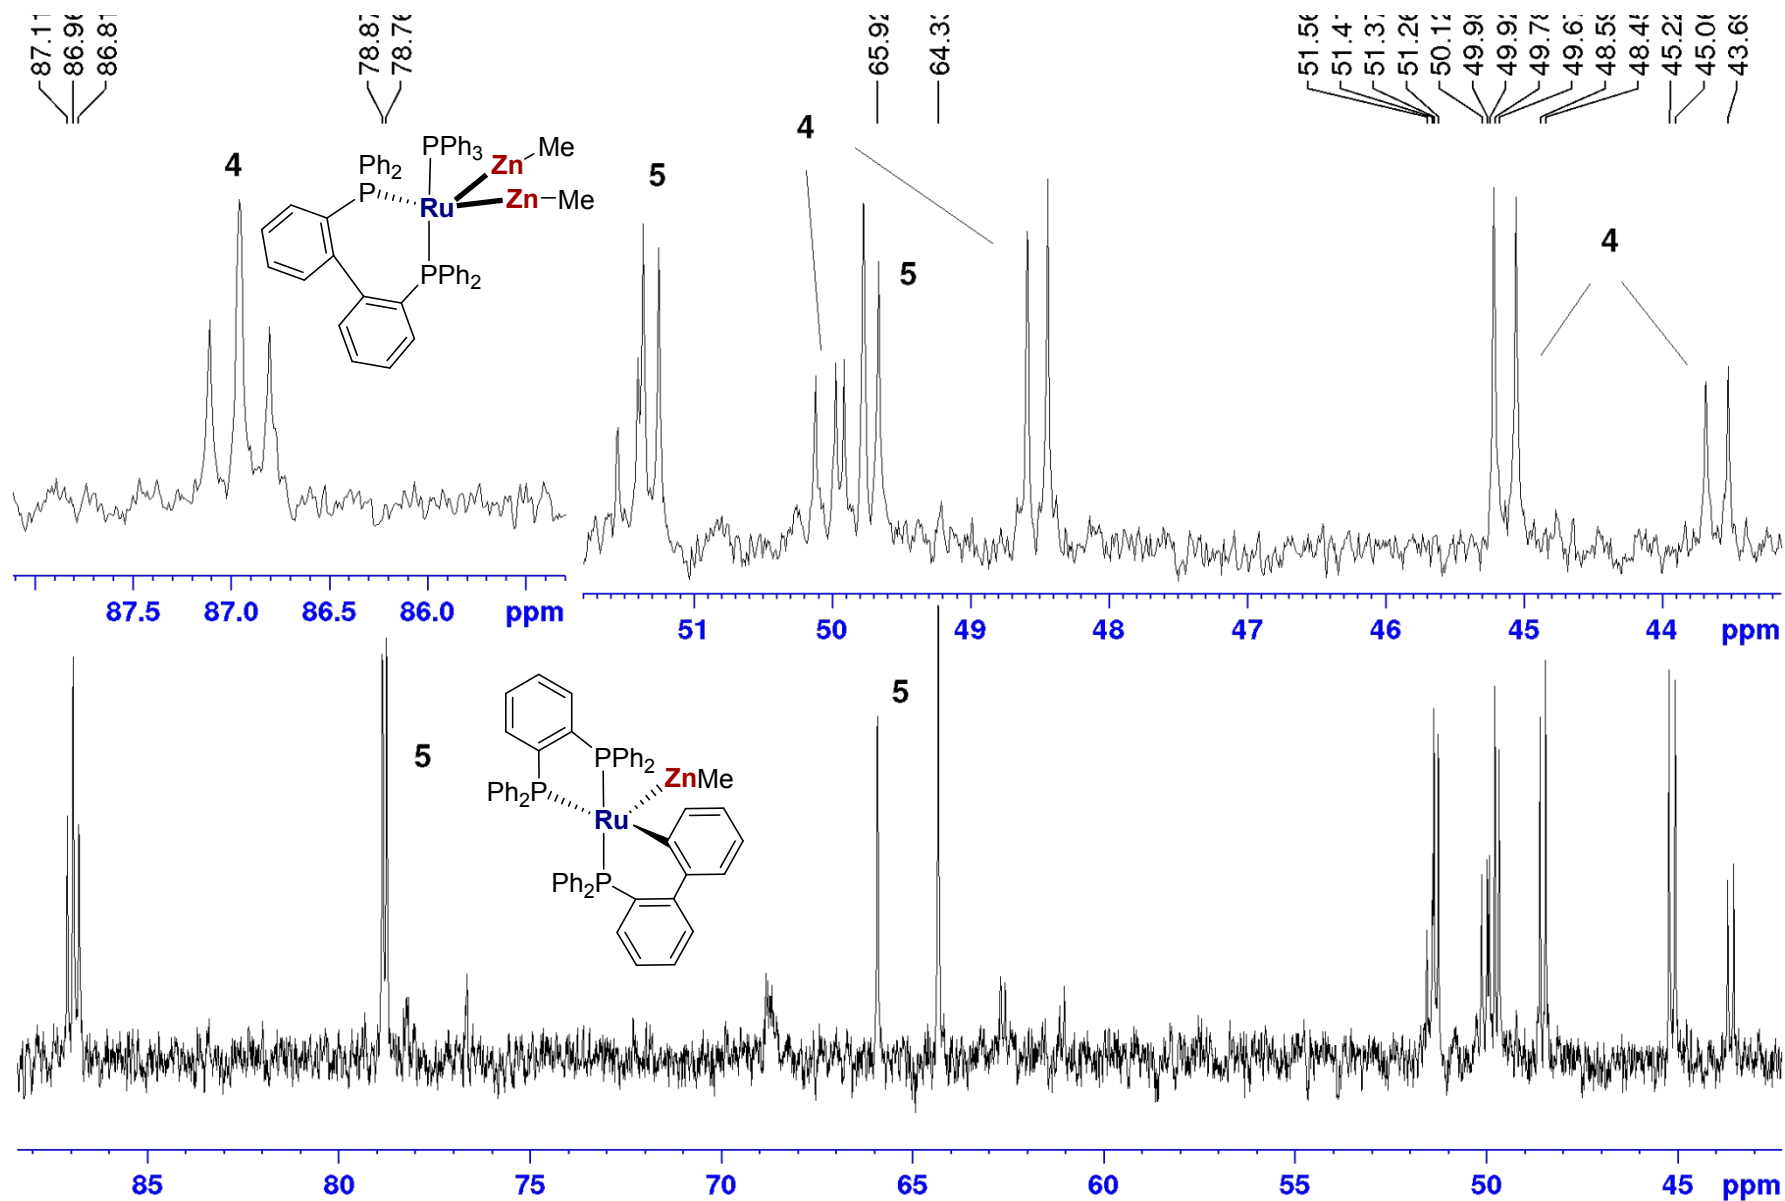

**Figure S3.**  $^{31}\text{P}\{^1\text{H}\}$  NMR spectrum (162 MHz, 298 K) upon heating  $[\text{Ru}(\text{PPh}_3)(\text{C}_6\text{H}_4\text{PPh}_2)_2(\text{ZnMe})_2]$  (**2**) in  $\text{C}_6\text{D}_5\text{CD}_3$  at  $80^\circ\text{C}$  for 30 h highlighting the signals arising from the proposed intermediate  $[\text{Ru}(\text{BIPHEP})(\text{PPh}_3)(\text{ZnMe})_2]$  (**4**) and  $[\text{Ru}(\text{dppbz})(\text{PPh}_2(\text{biphenyl}))'(\text{ZnMe})]$  (**5**).

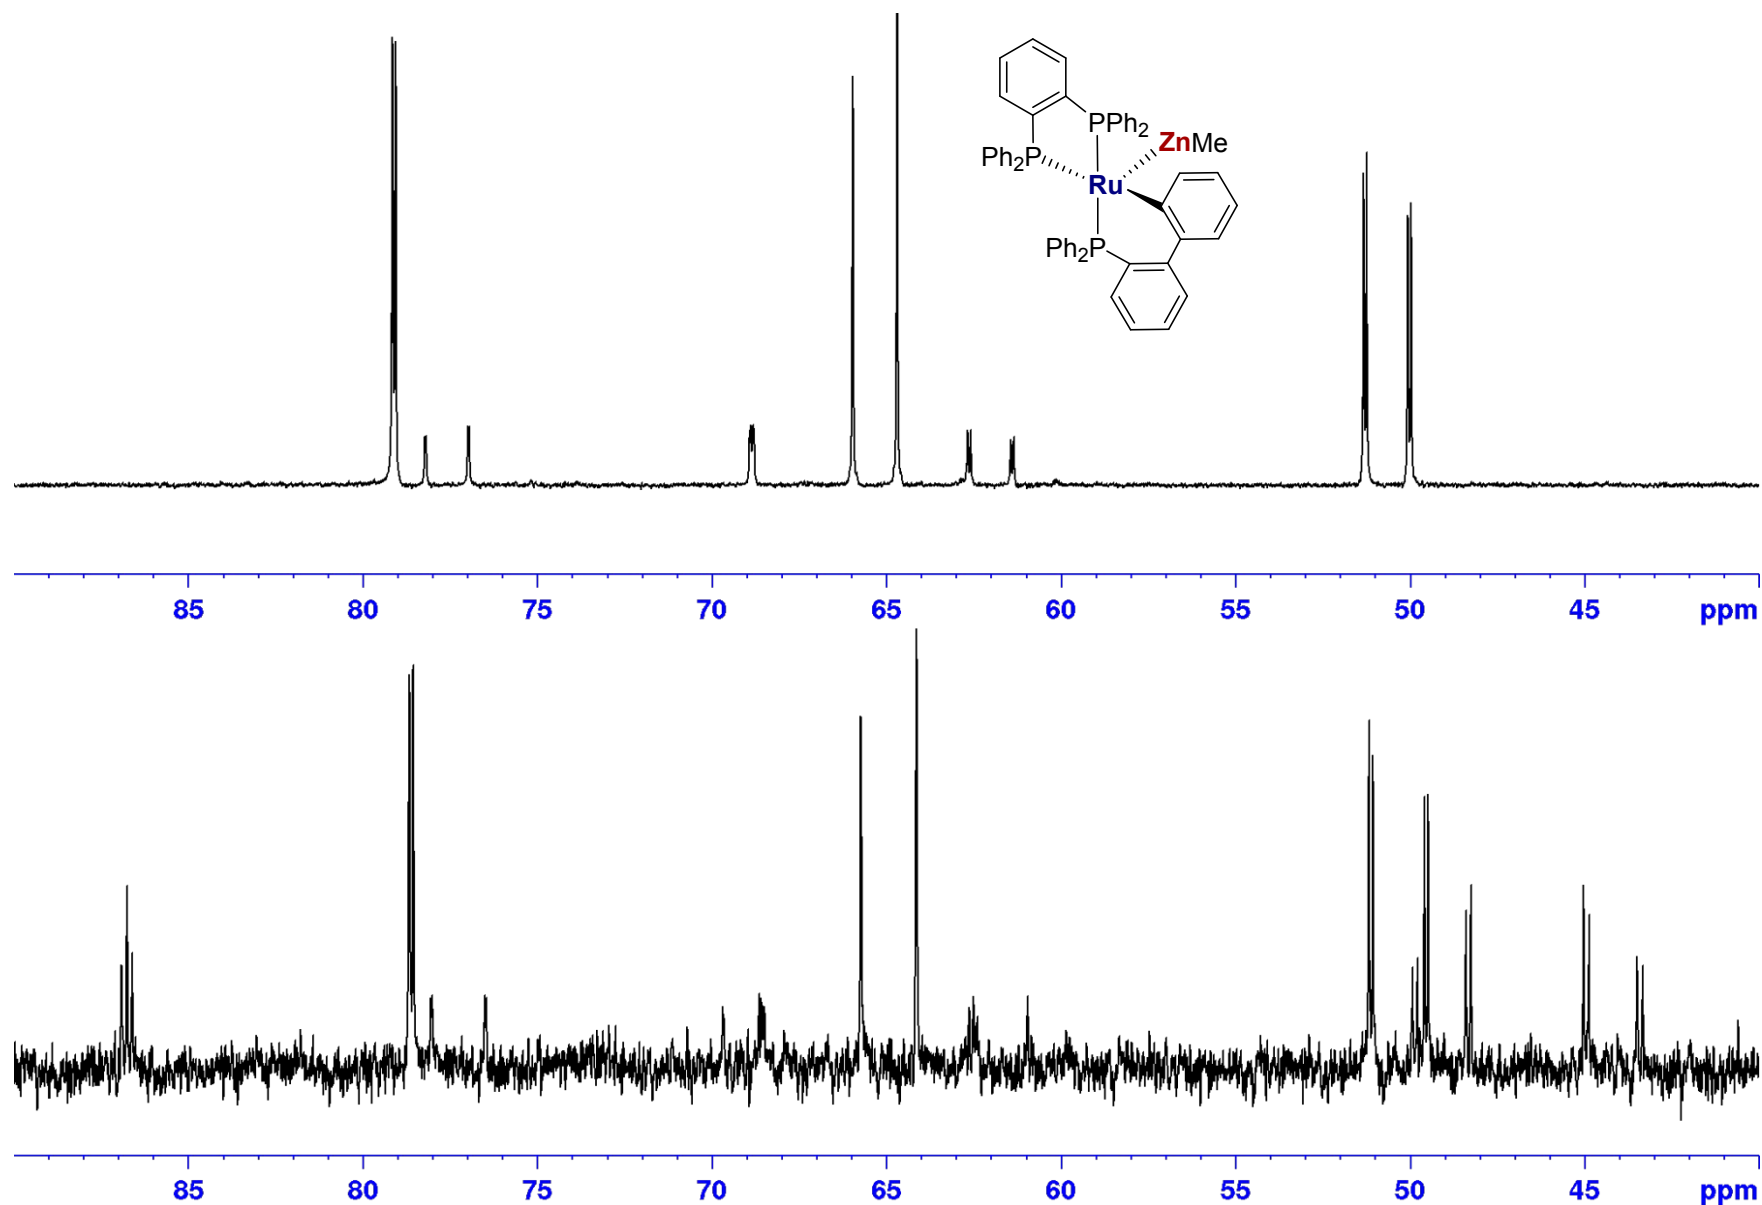

**Figure S4.**  $^{31}\text{P}\{^1\text{H}\}$  NMR signals (162 MHz) from (bottom) heating  $[\text{Ru}(\text{PPh}_2)_2(\text{C}_6\text{H}_4\text{PPh}_2)_2(\text{ZnMe})_2]$  (**2**) in  $\text{C}_6\text{D}_5\text{CD}_3$  at 80 °C for 55 h compared to (top) those of isolated  $[\text{Ru}(\text{dppbz})(\text{PPh}_2(\text{biphenyl}))(\text{ZnMe})]$  (**5**:  $\text{C}_6\text{D}_6$ , 162 MHz, 298 K). Major and minor isomers account for all the signals in the top spectrum.<sup>1</sup>

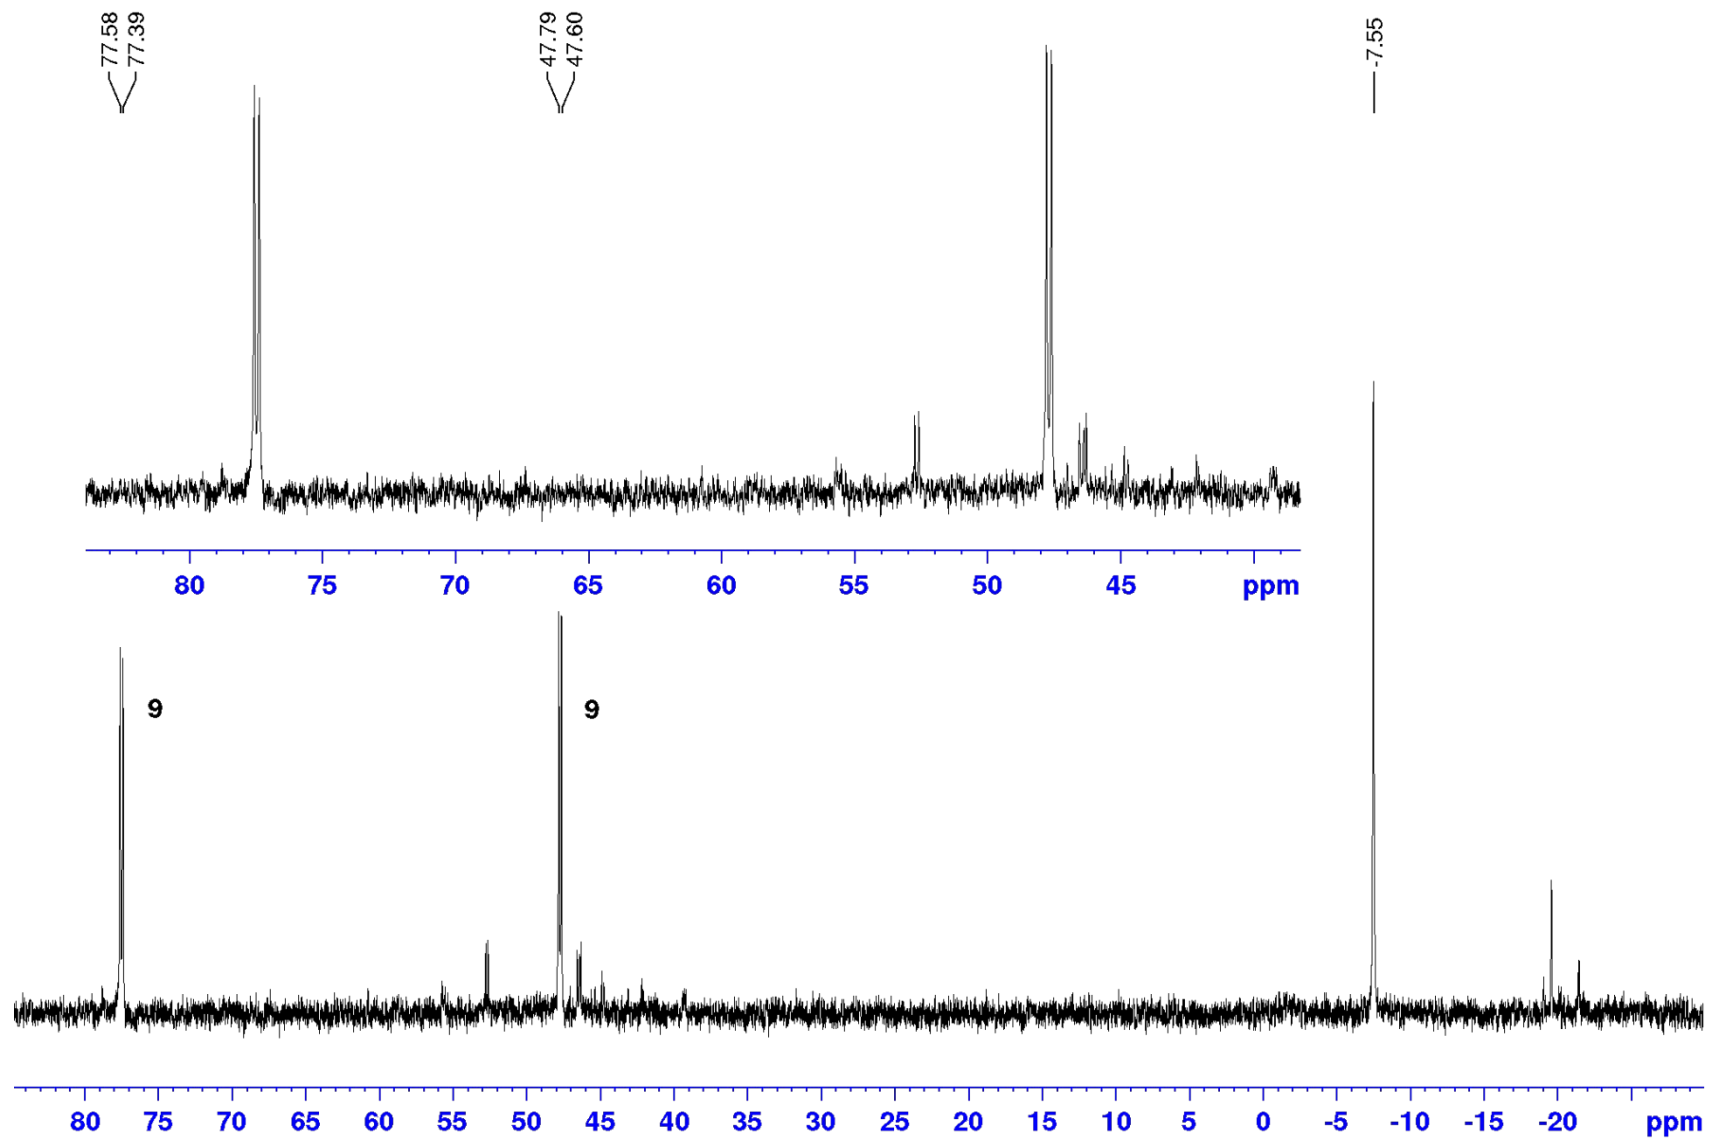

**Figure S5.**  $^{31}\text{P}\{^1\text{H}\}$  NMR spectrum (202 MHz, 298 K) after heating  $[\text{Ru}(\text{PPh}_3)_2(\text{C}_6\text{H}_4\text{PPh}_2)(\text{ZnMe})_2][\text{BAr}^{\text{F}}_4]$  (**3**) for 2 days at 80 °C in  $\text{C}_6\text{D}_6$  showing the two doublet signals for the unknown product **9**.

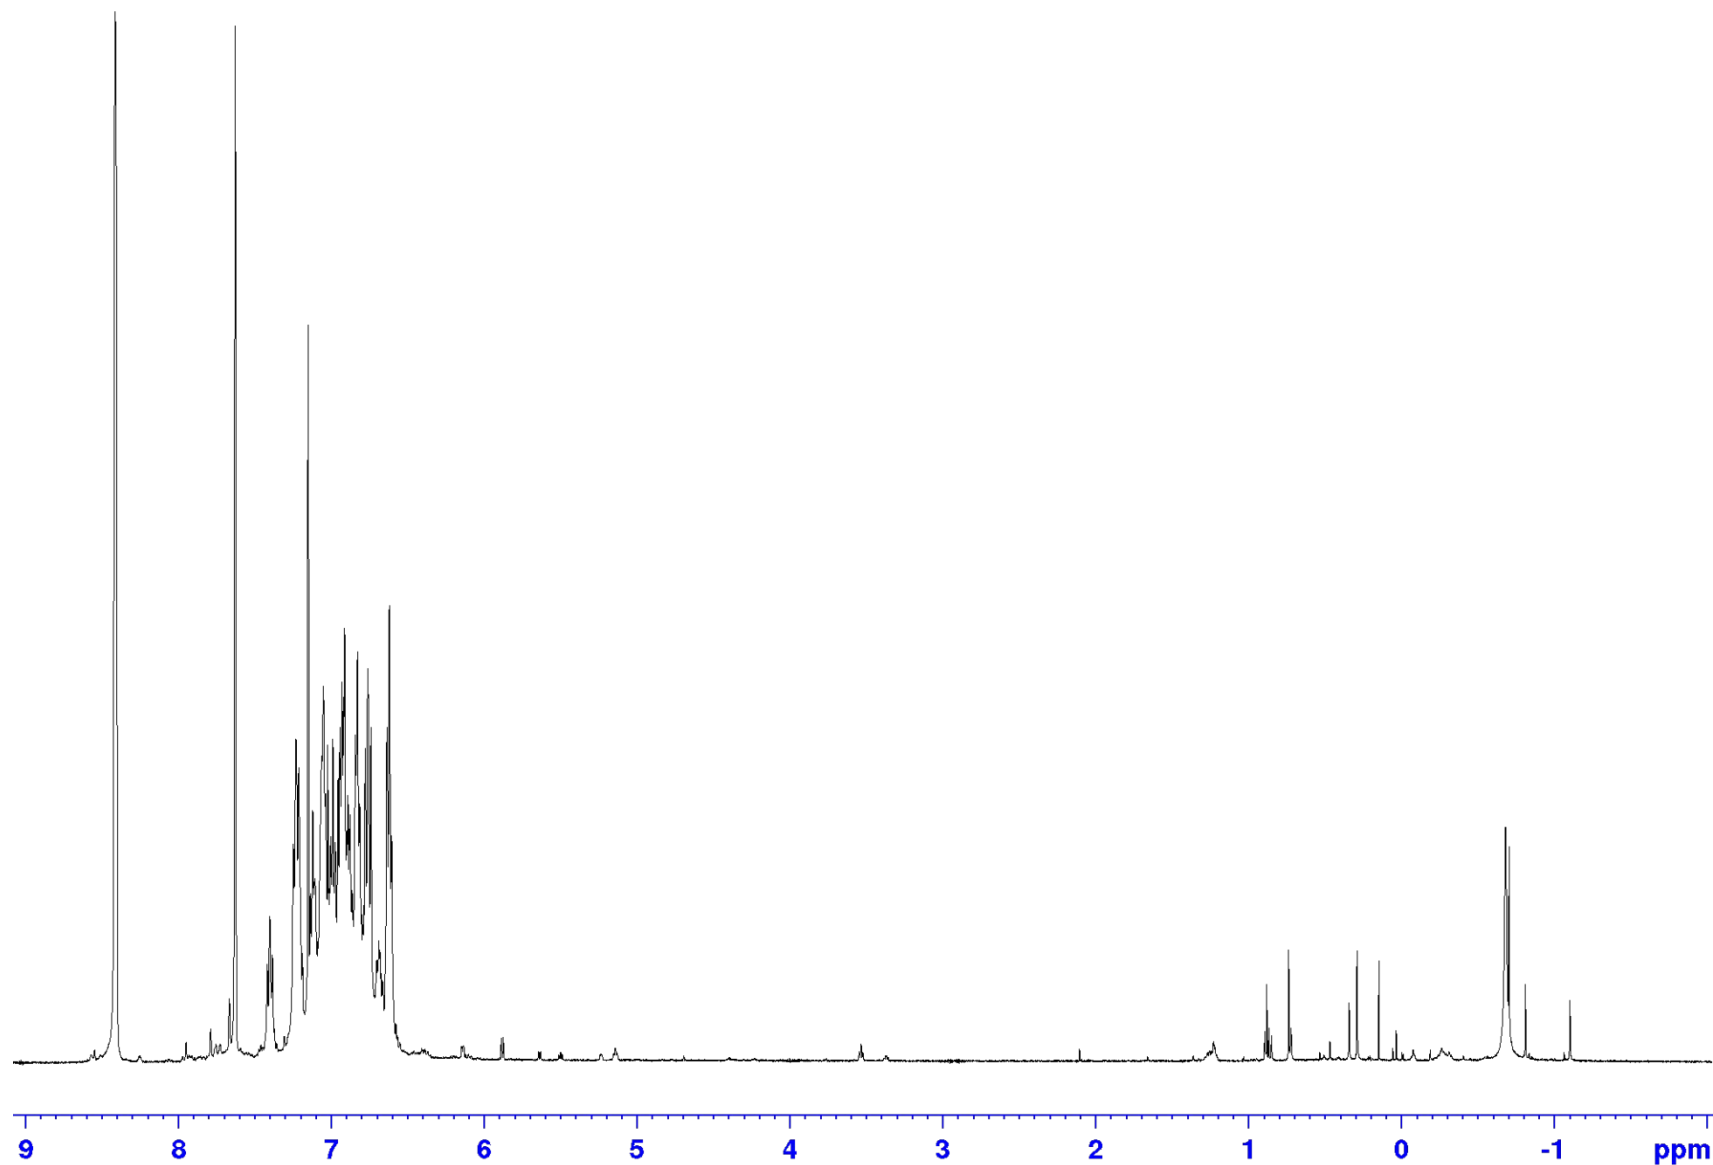

**Figure S6.**  $^1\text{H}$  NMR spectrum (500 MHz, 298 K) after heating  $[\text{Ru}(\text{PPh}_3)_2(\text{C}_6\text{H}_4\text{PPh}_2)(\text{ZnMe}_2)][\text{BARF}_4]$  (**3**) for 2 days at 80 °C in  $\text{C}_6\text{D}_6$ . The spectrum highlights the absence of diagnostic signals to help in the assignment of **9**.



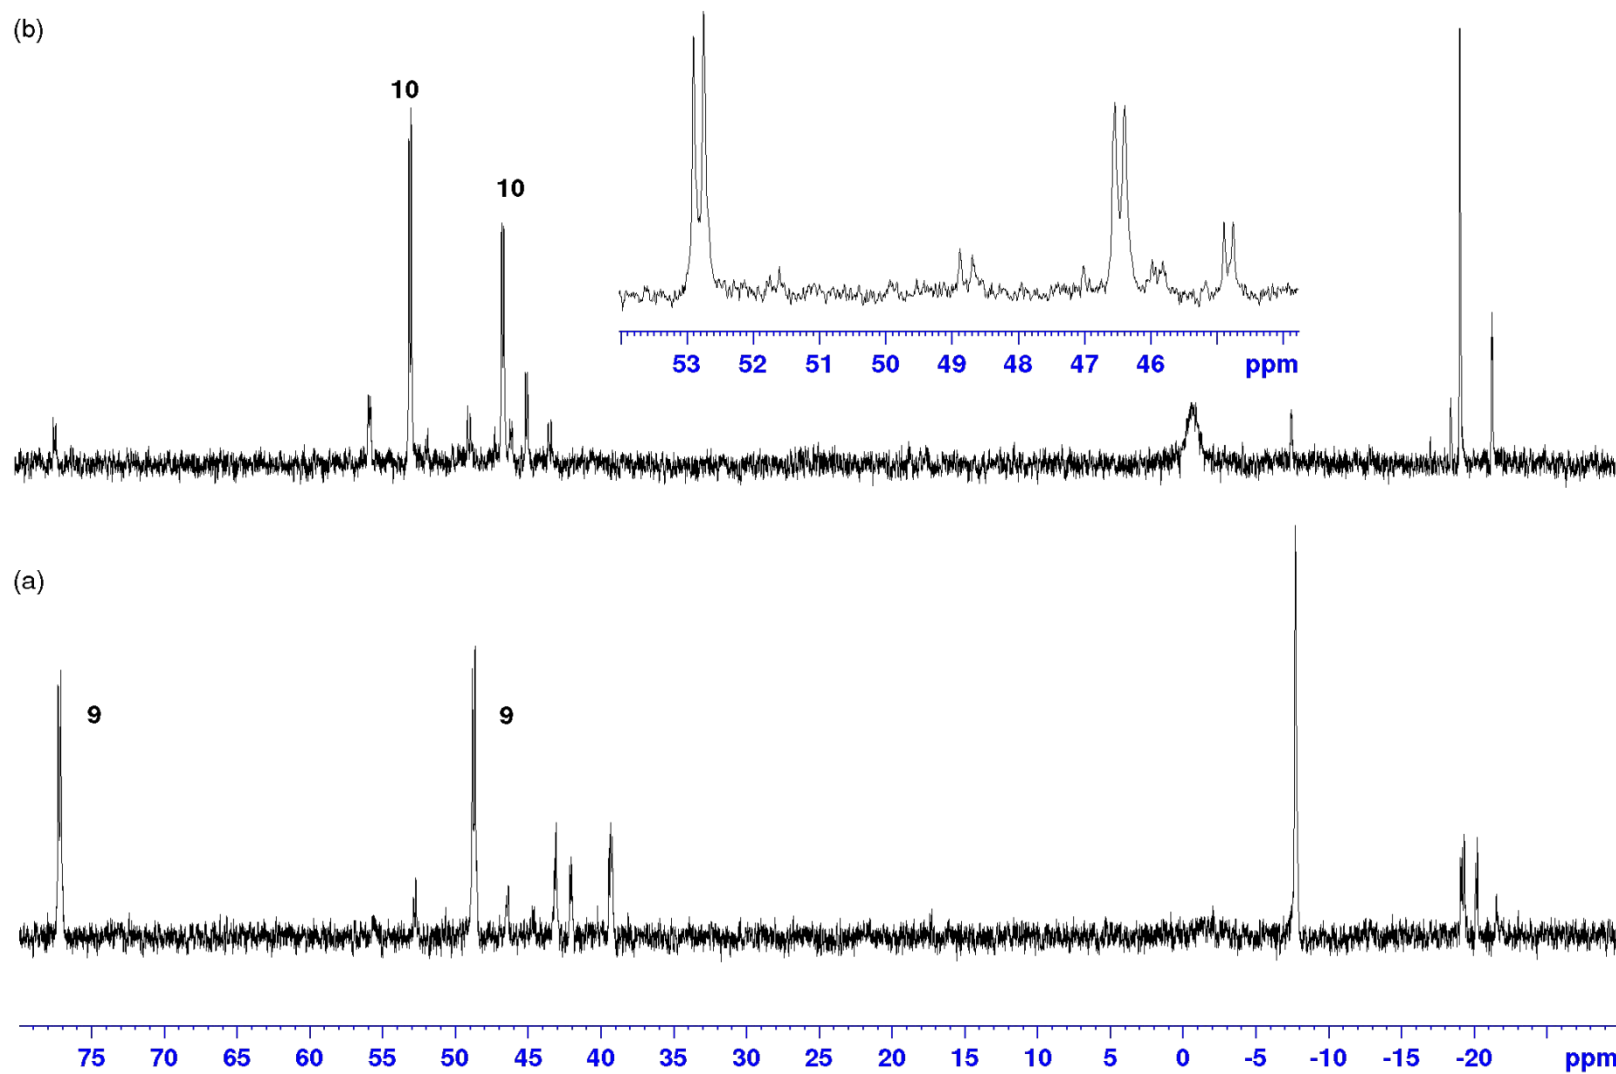

**Figure S7.**  $^{31}\text{P}\{^1\text{H}\}$  NMR spectra (202 MHz, 298 K) showing the formation of **9** and subsequent transformation to **10** (signal of which are highlighted in the inset) upon heating  $[\text{Ru}(\text{PPh}_3)_2(\text{C}_6\text{H}_4\text{PPh}_2)(\text{ZnMe})_2][\text{BAR}^{\text{F}}_4]$  (**3**) at 110 °C in toluene- $d_8$  for (a) 3 h and (b) 3 days.

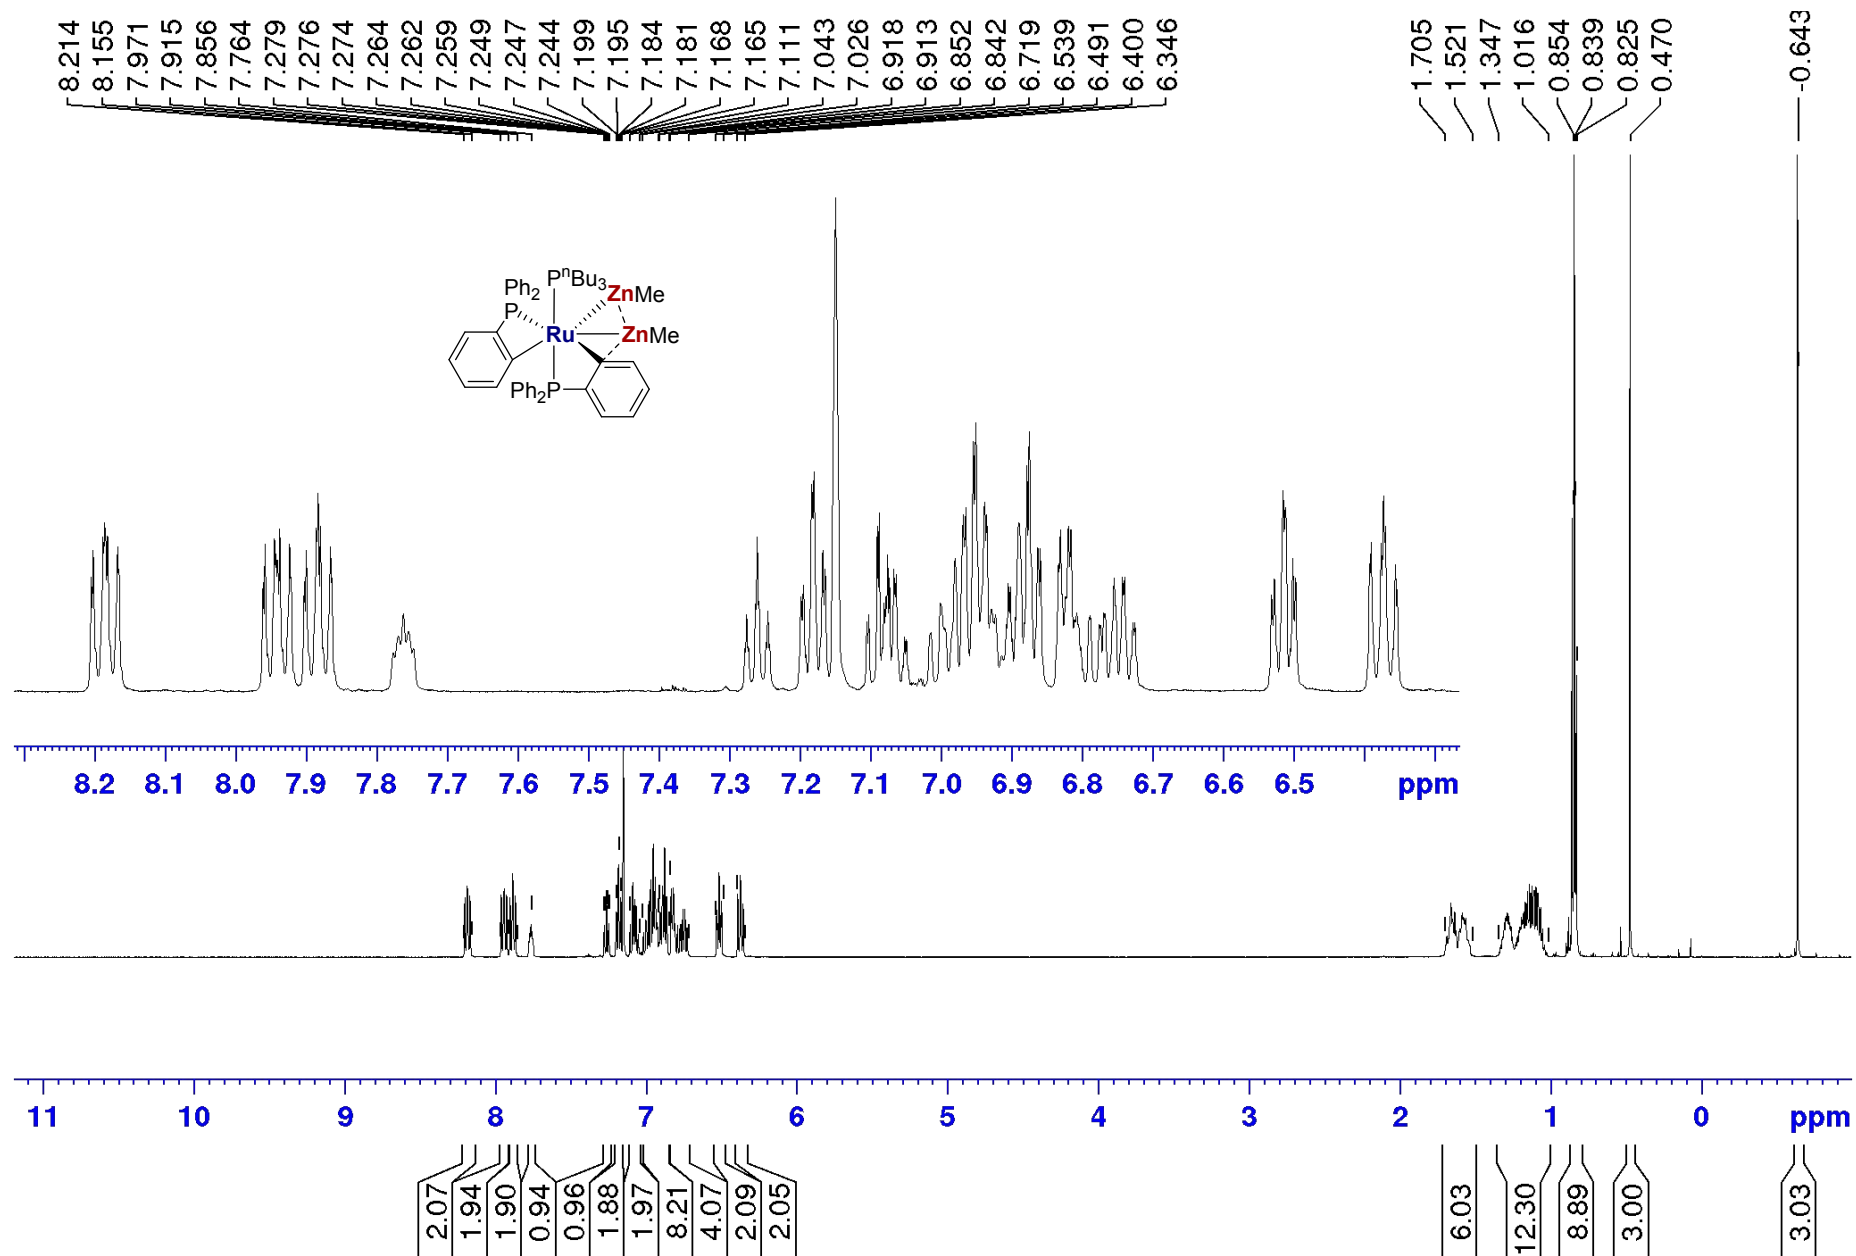

**Figure S8.**  $^1\text{H}$  NMR spectrum (500 MHz,  $\text{C}_6\text{D}_6$ , 298 K) of  $\text{Ru}(\text{PBu}_3)(\text{C}_6\text{H}_4\text{PPh}_2)_2(\text{ZnMe})_2$  (**6**), with inset of high frequency region.

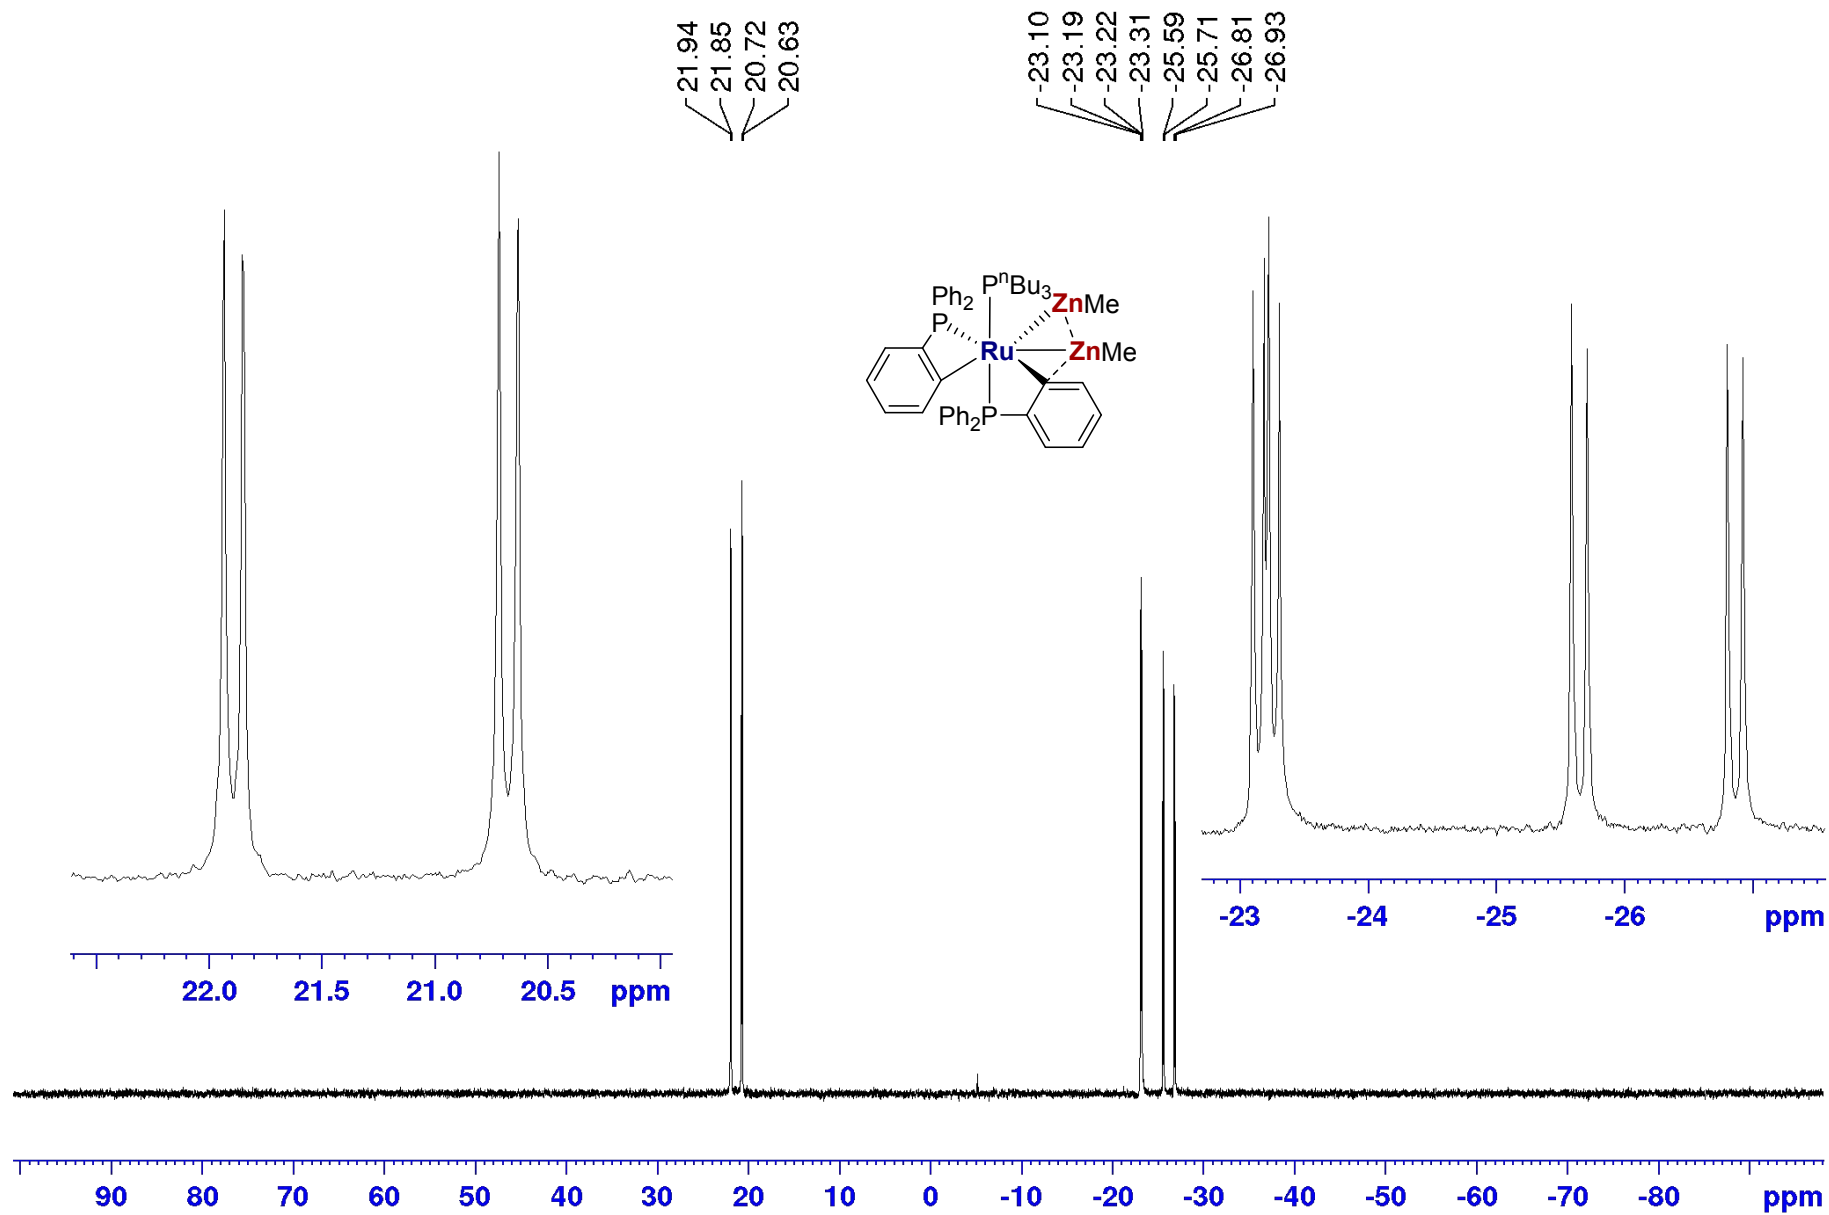

**Figure S9.**  $^{31}\text{P}\{^1\text{H}\}$  NMR spectrum (202 MHz,  $\text{C}_6\text{D}_6$ , 298 K) of  $[\text{Ru}(\text{P}^n\text{Bu}_3)(\text{C}_6\text{H}_4\text{PPh}_2)_2(\text{ZnMe})_2]$  (**6**).

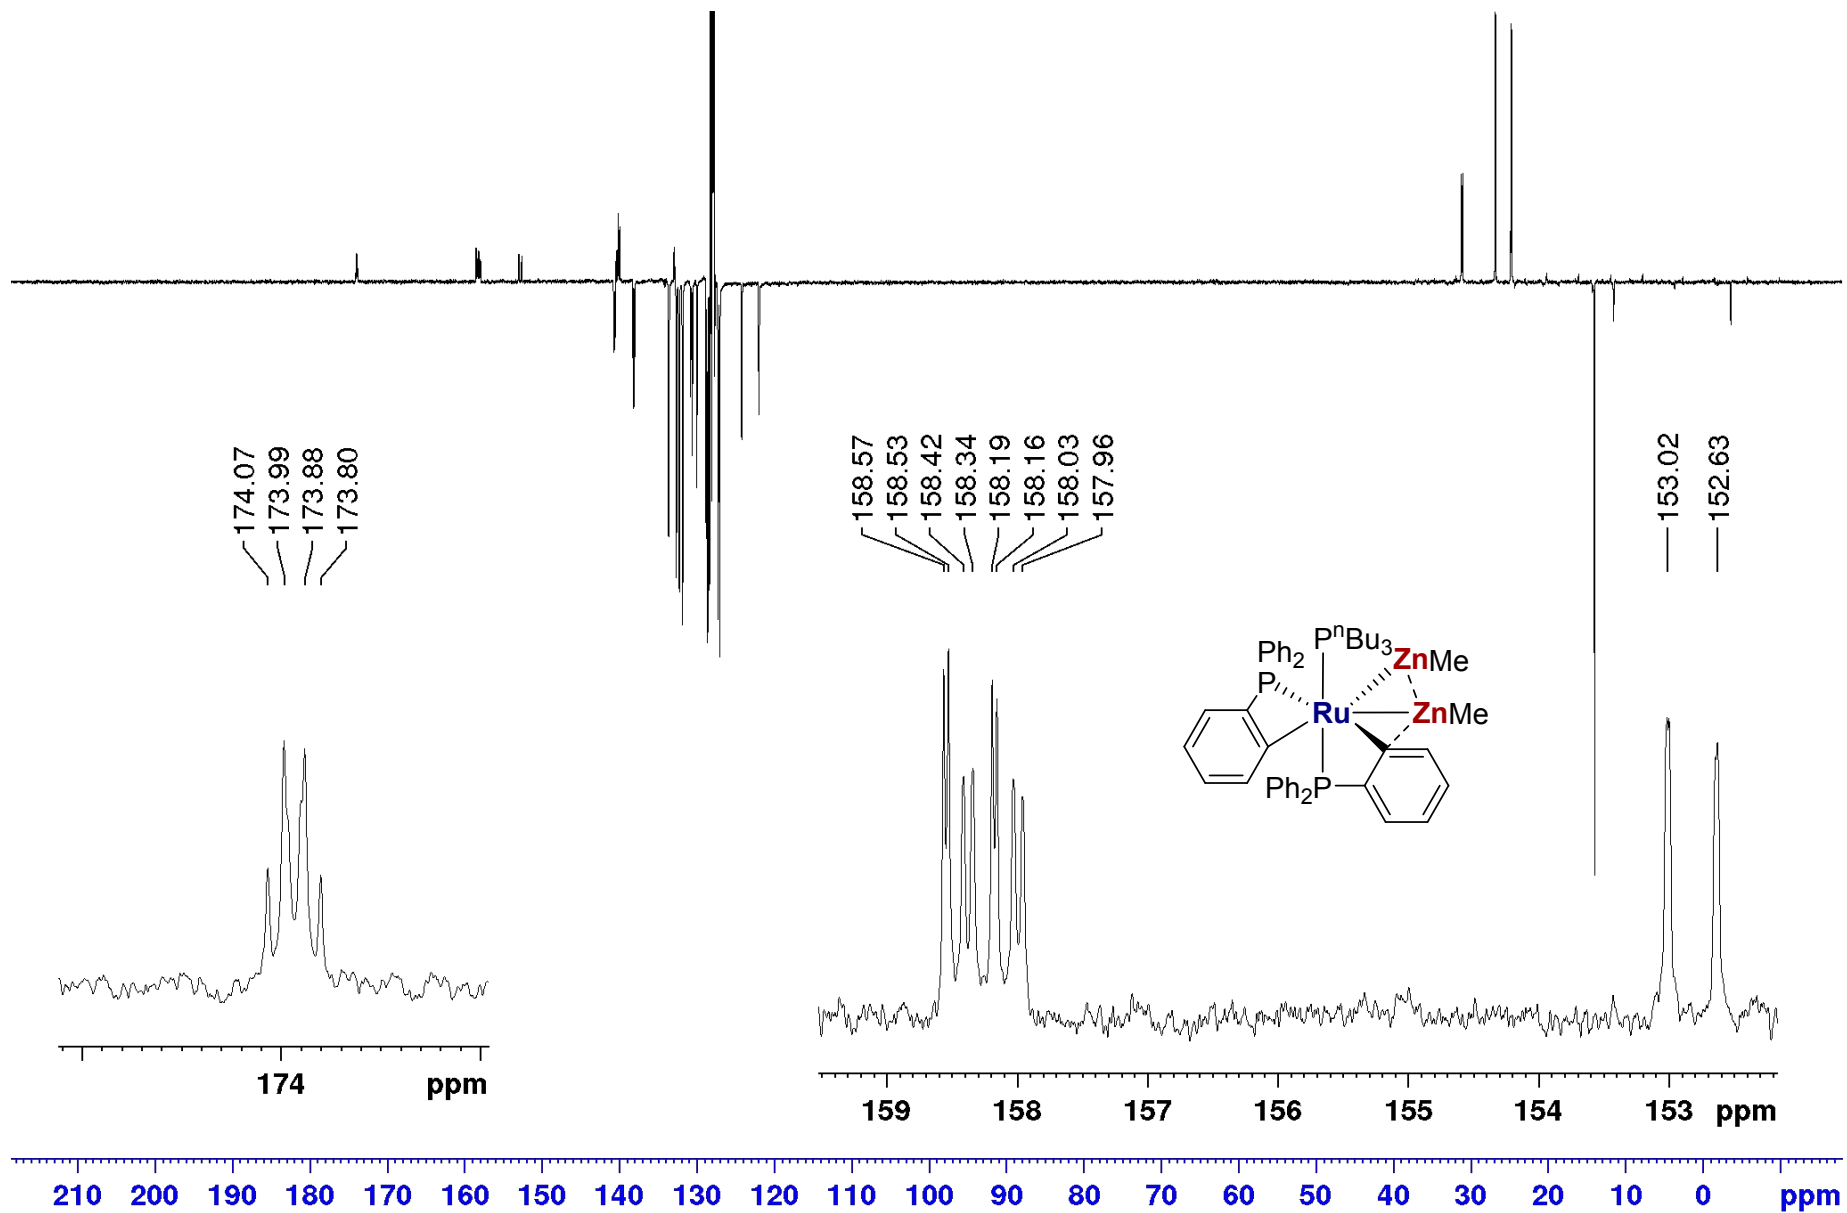

**Figure S10.**  $^{13}\text{C}\{^1\text{H}\}$  (PENDANT) NMR spectrum (126 MHz,  $\text{C}_6\text{D}_6$ , 298 K) of  $[\text{Ru}(\text{P}^n\text{Bu}_3)(\text{C}_6\text{H}_4\text{PPh}_2)_2(\text{ZnMe})_2]$  (6), with insets of high frequency resonances.

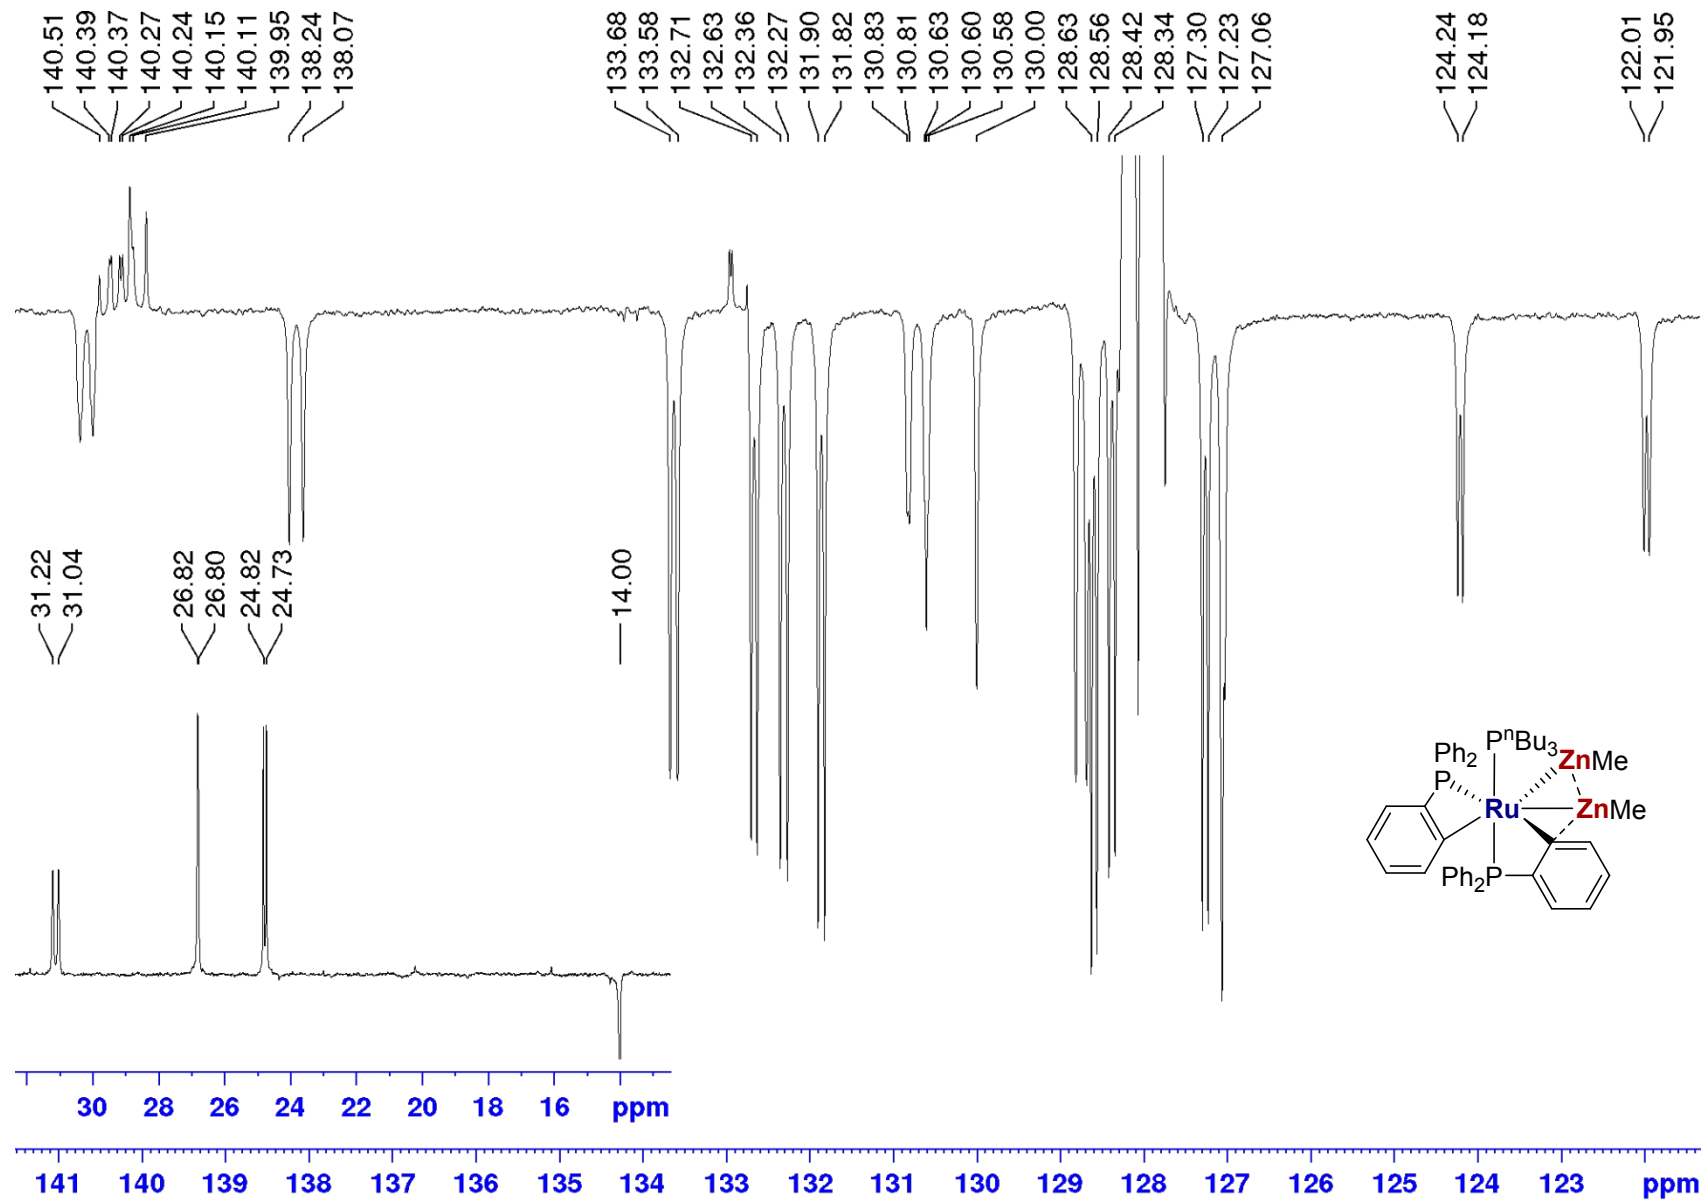

**Figure S11.** Aromatic and low frequency regions of the  $^{13}\text{C}\{^1\text{H}\}$  (PENDANT) NMR spectrum (126 MHz,  $\text{C}_6\text{D}_6$ , 298 K) of  $[\text{Ru}(\text{P}^n\text{Bu}_3)(\text{C}_6\text{H}_4\text{PPh}_2)_2(\text{ZnMe})_2]$  (6).

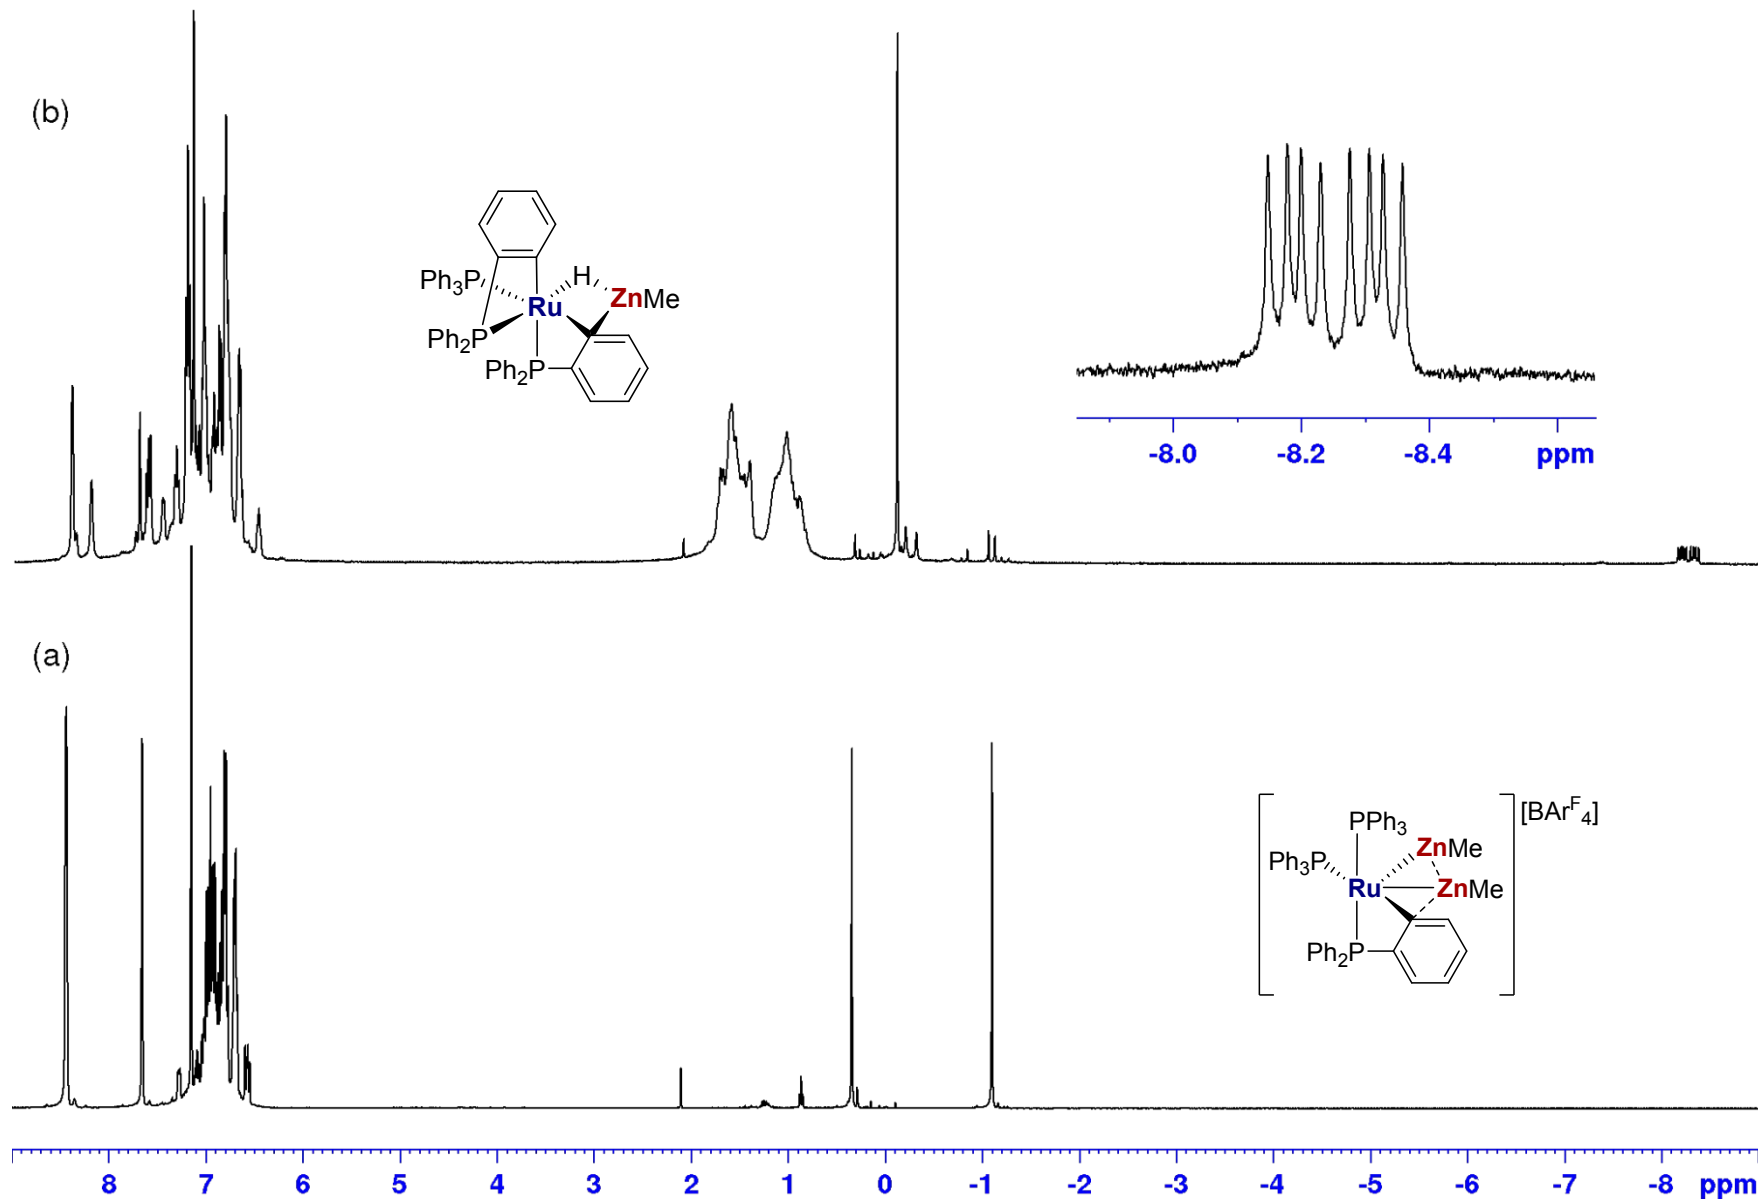

**Figure S12.** The  $^1\text{H}$  NMR spectrum (400 MHz,  $\text{C}_6\text{D}_6$ , 298 K) of (a) isolated  $[\text{Ru}(\text{PPh}_3)_2(\text{C}_6\text{H}_4\text{PPh}_2)(\text{ZnMe})_2][\text{BAR}^{\text{F}}_4]$  (**3**) and (b) recorded 15 min after room temperature addition of  $\text{PCy}_3$  (2 equiv) to **3** showing formation of  $[\text{Ru}(\text{PPh}_3)(\text{C}_6\text{H}_4\text{PPh}_2)_2\text{H}(\text{ZnMe})]$  (**1**). The diagnostic hydride signal of **1** is in the inset.

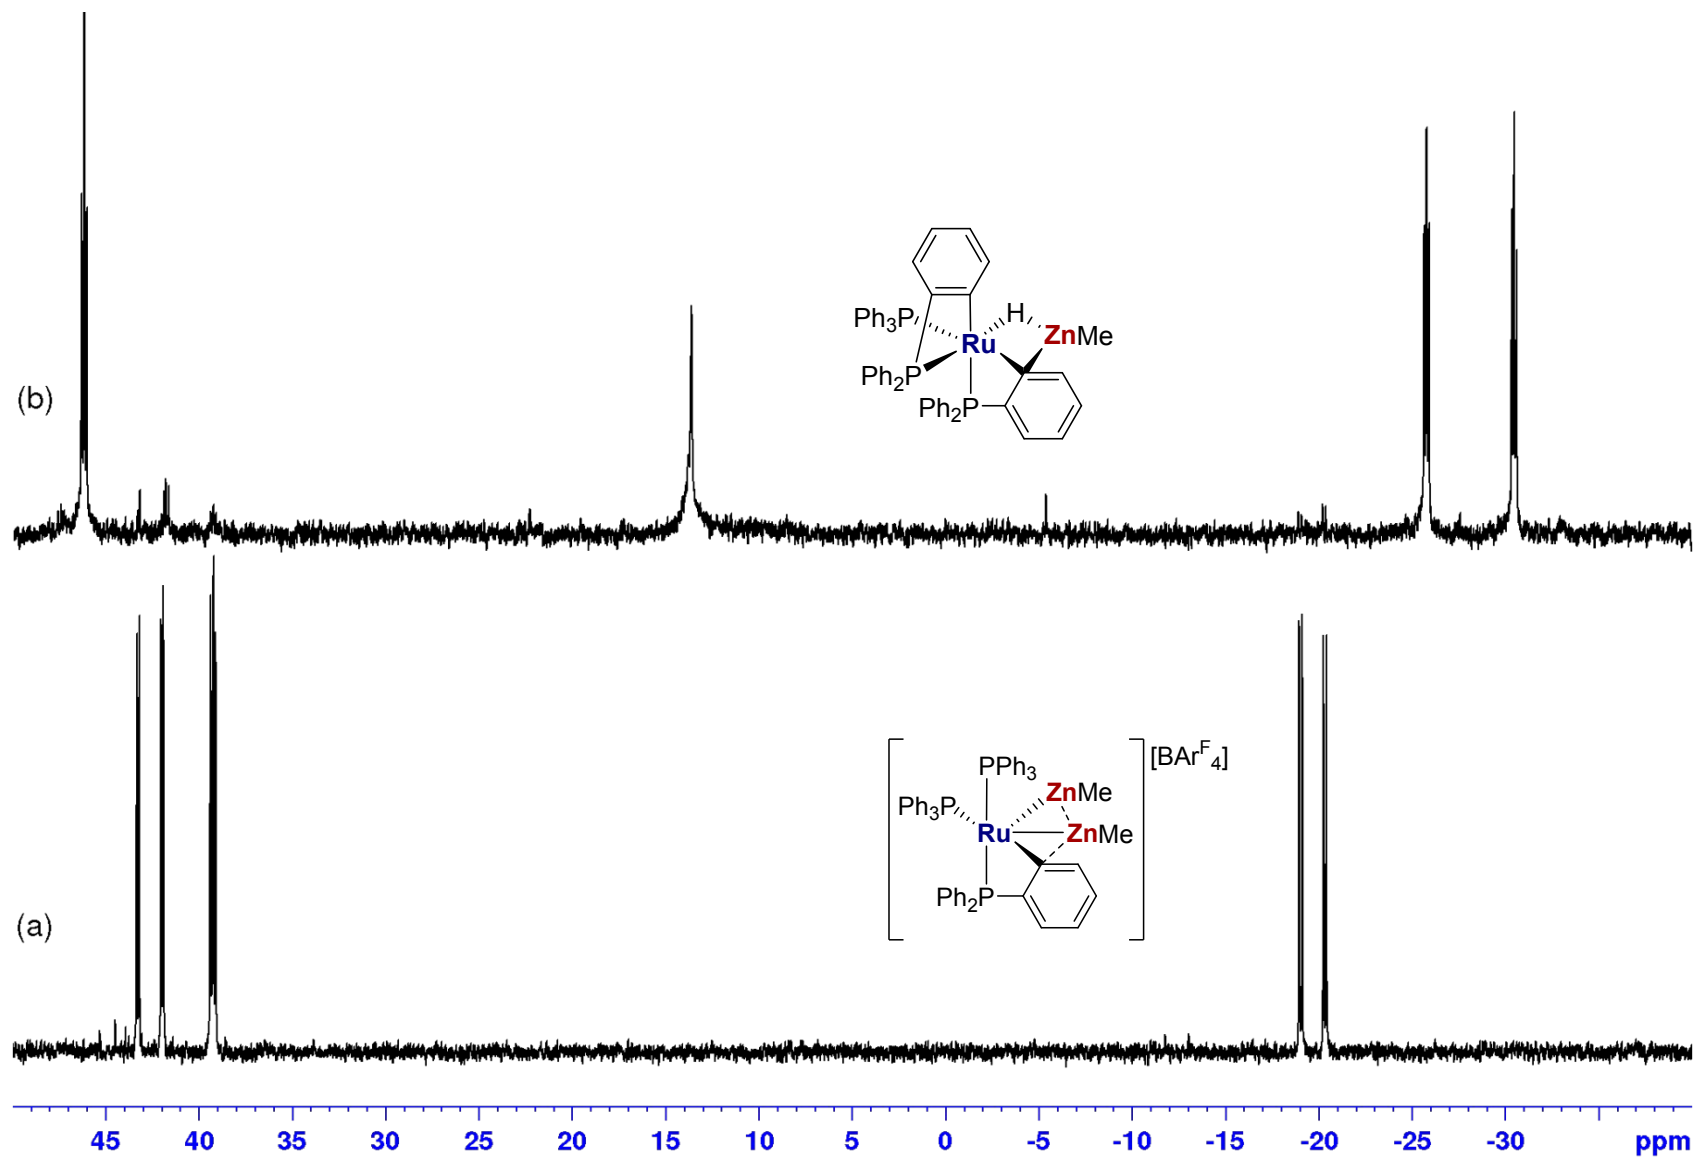

**Figure S13.** The  $^{31}\text{P}\{^1\text{H}\}$  NMR spectrum (162 MHz,  $\text{C}_6\text{D}_6$ , 298 K) of (a) isolated  $[\text{Ru}(\text{PPh}_3)_2(\text{C}_6\text{H}_4\text{PPh}_2)(\text{ZnMe})_2][\text{BAr}^{\text{F}}_4]$  (**3**) and (b) 15 min after room temperature addition of  $\text{PCy}_3$  (2 equiv) to **3** showing formation of  $[\text{Ru}(\text{PPh}_3)(\text{C}_6\text{H}_4\text{PPh}_2)_2\text{H}(\text{ZnMe})]$  (**1**).

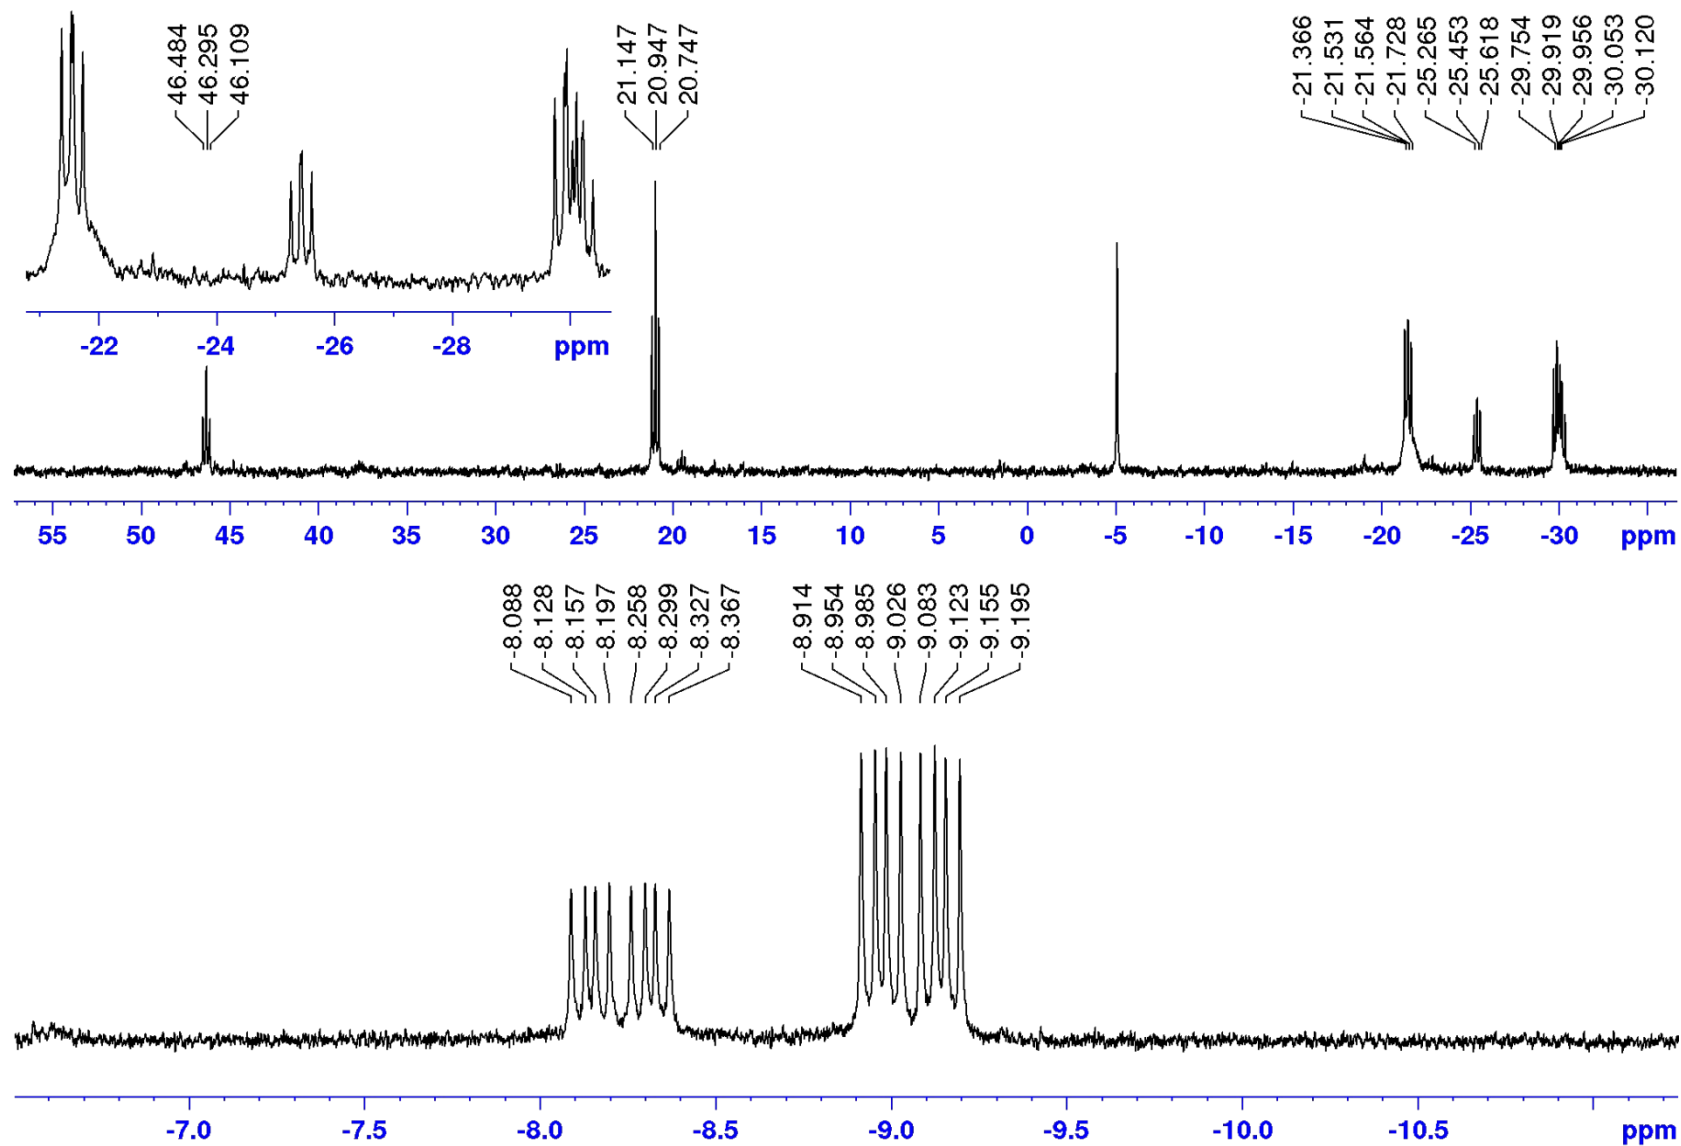

**Figure S14.** (Bottom) Room temperature (298 K)  $^1\text{H}$  NMR (300 MHz) and (top)  $^{31}\text{P}\{^1\text{H}\}$  NMR (121 MHz) recorded 15 min after addition of  $\text{P}^n\text{Bu}_3$  (2 equiv) to a  $\text{C}_6\text{D}_6$  solution of  $[\text{Ru}(\text{PPh}_3)_2(\text{C}_6\text{H}_4\text{PPh}_2)(\text{ZnMe})_2][\text{BAr}^{\text{F}}_4]$  (**3**).



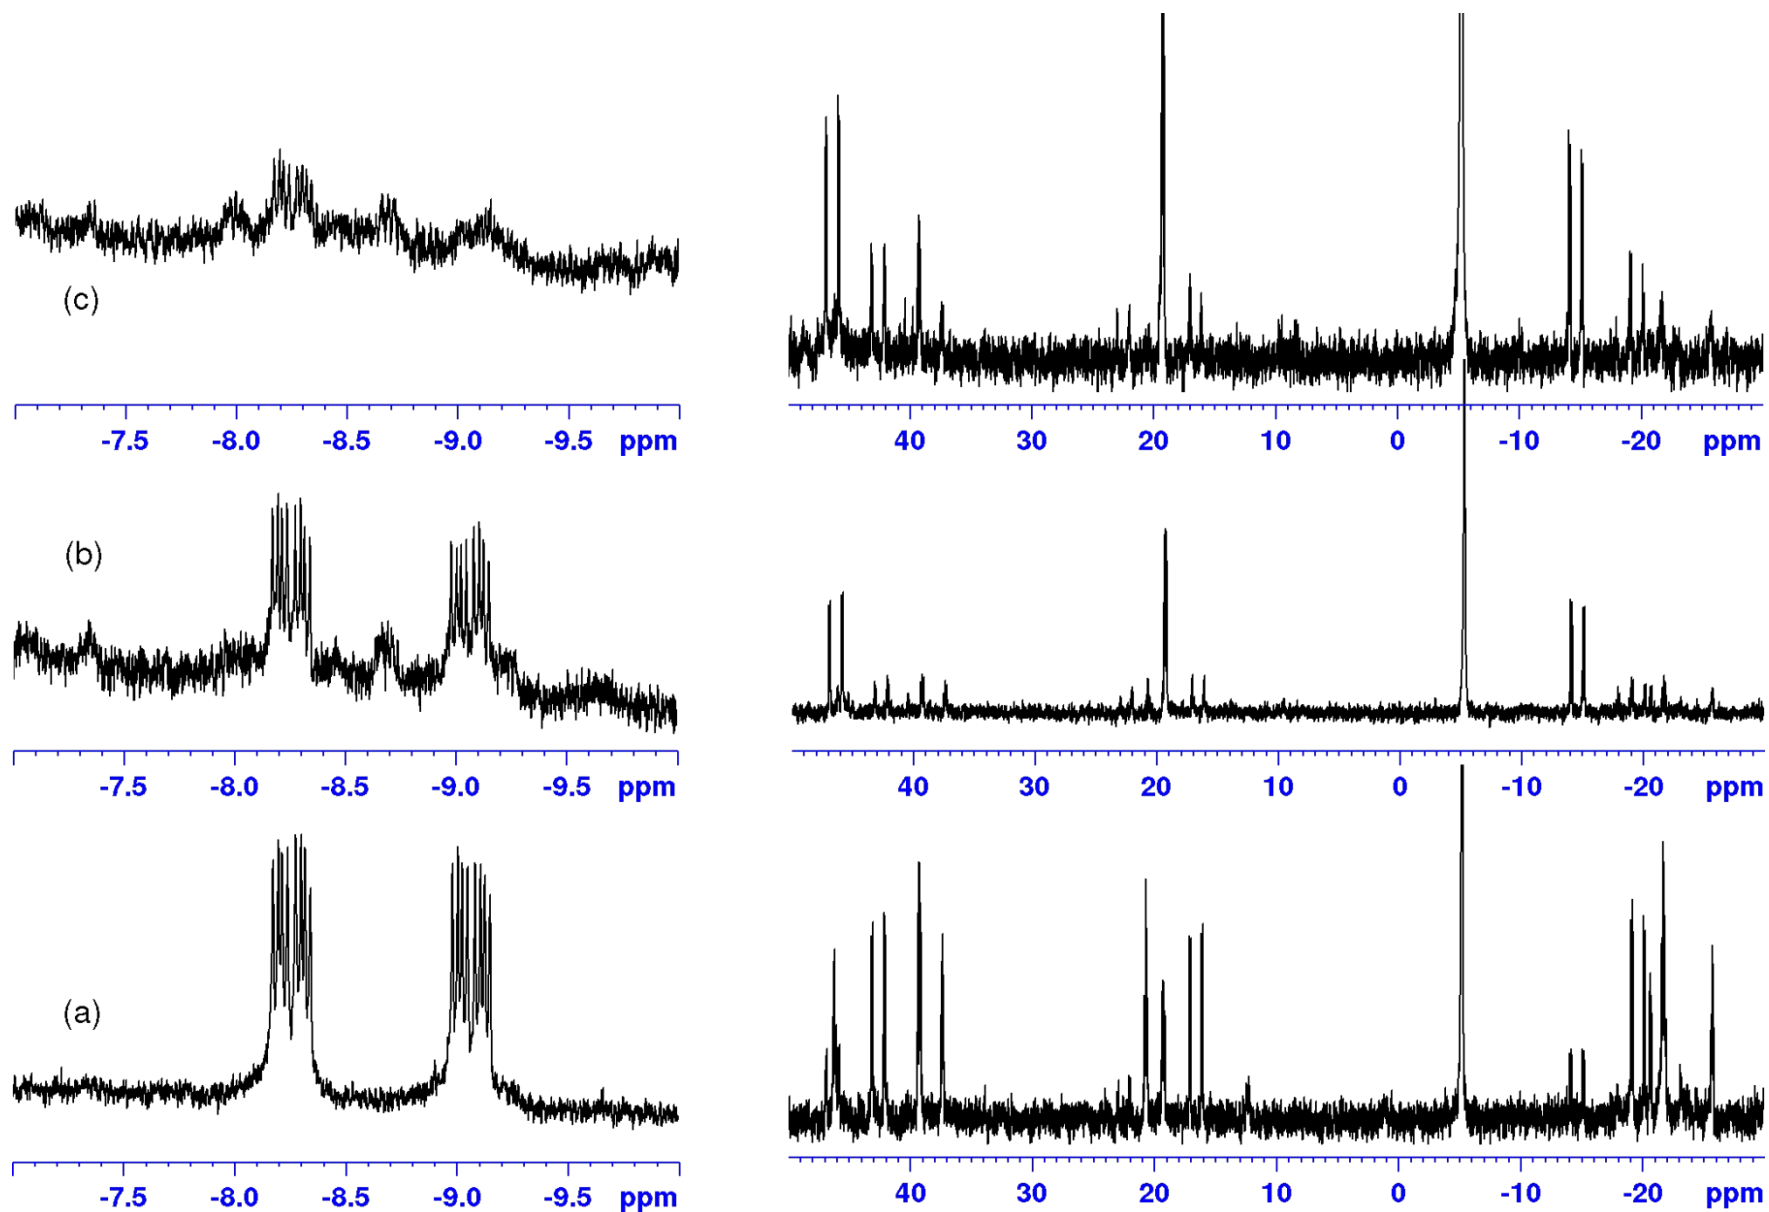

**Figure S15.** (Left) Hydride region of the  $^1\text{H}$  NMR (400 MHz) and (right)  $^{31}\text{P}\{^1\text{H}\}$  NMR (162 MHz) spectra (298 K) recorded (a) 15 min, (b) 6 h and (c) 25 h after addition of  $\text{P}^n\text{Bu}_3$  (1 equiv) to a  $\text{C}_6\text{D}_6$  solution of  $[\text{Ru}(\text{PPh}_3)_2(\text{C}_6\text{H}_4\text{PPh}_2)(\text{ZnMe})_2][\text{BAr}^{\text{F}}_4]$  (**3**).

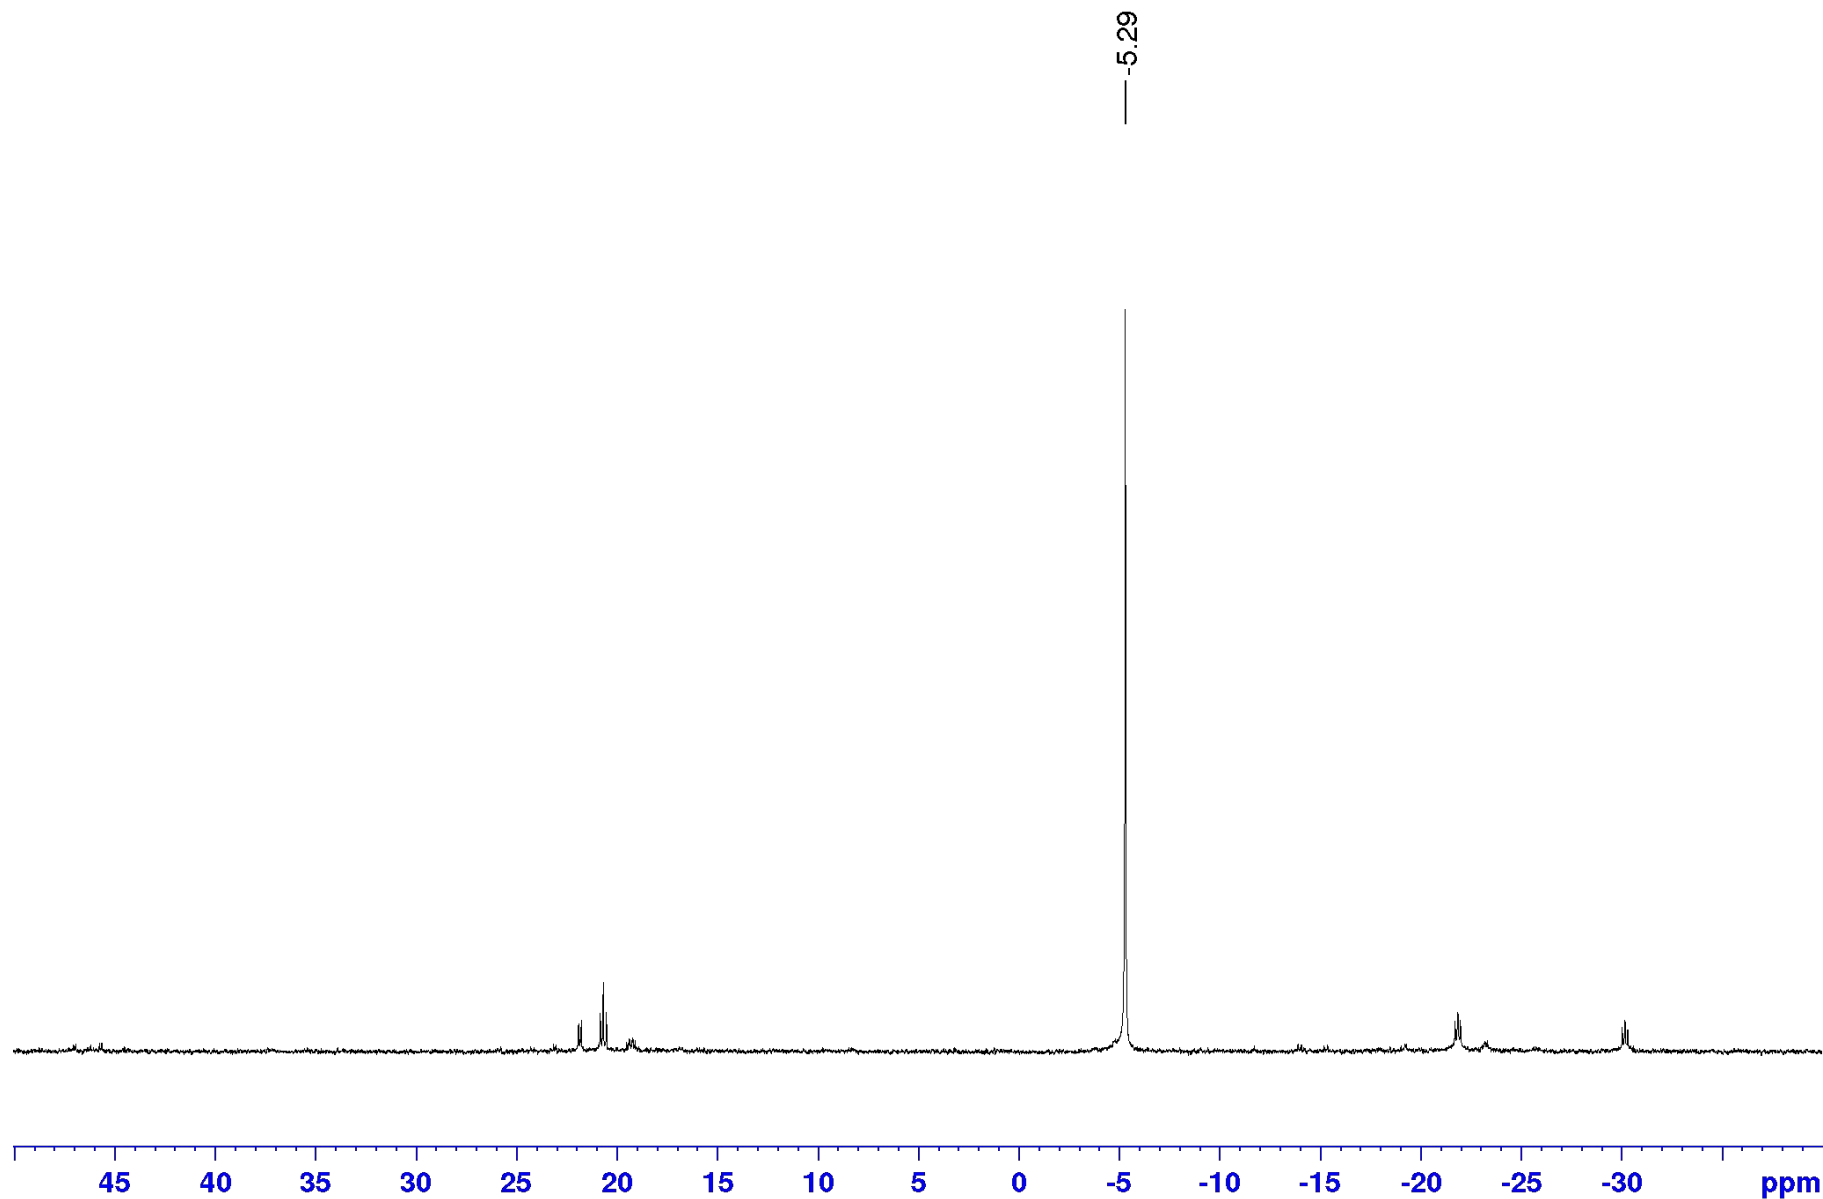

**Figure S16.**  $^{31}\text{P}\{^1\text{H}\}$  NMR (121 MHz, 298 K,  $\text{C}_6\text{D}_6$ ) spectrum recorded 20 h after treatment of  $[\text{Ru}(\text{PPh}_3)_2(\text{C}_6\text{H}_4\text{PPh}_2)(\text{ZnMe})_2][\text{BAr}^{\text{F}}_4]$  (**3**) with 2 equiv  $\text{P}^n\text{Bu}_3$ .

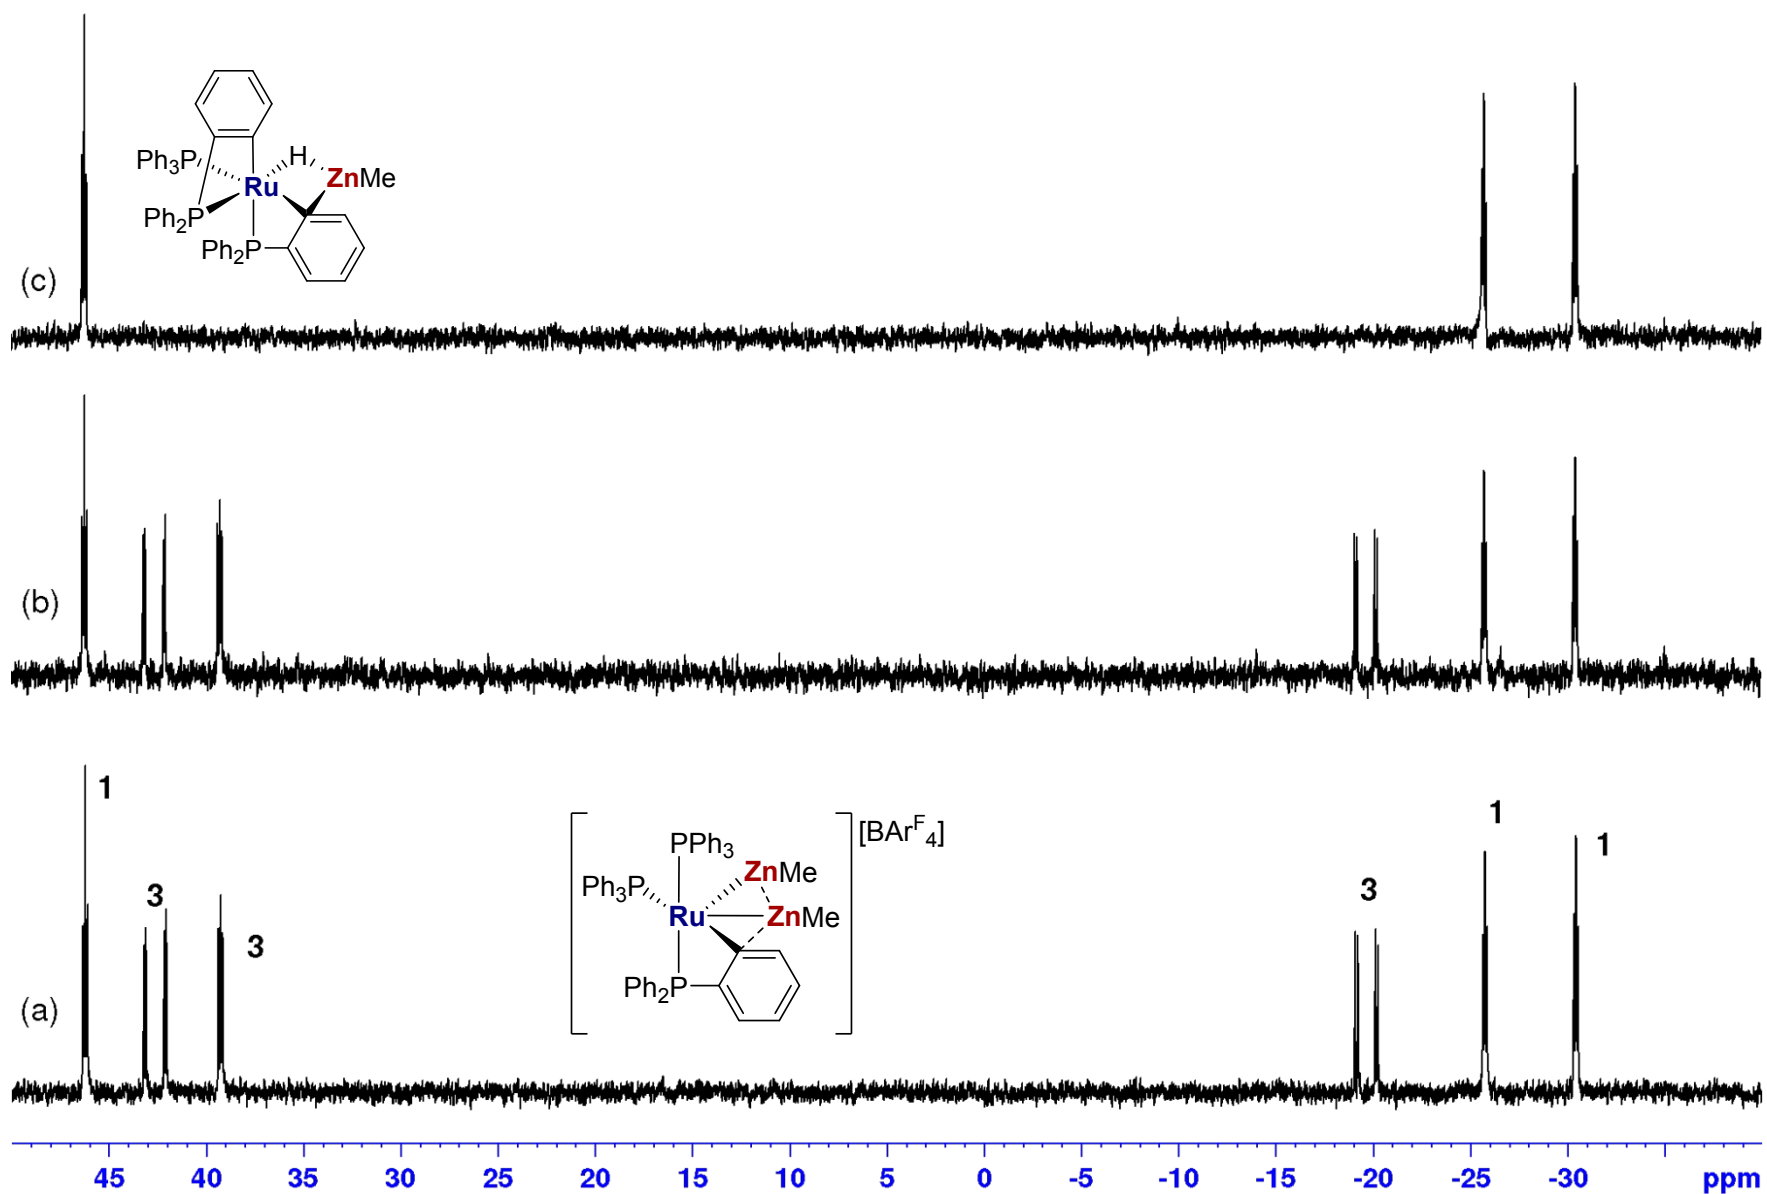

**Figure S17.**  $^{31}\text{P}\{^1\text{H}\}$  NMR spectra (202 MHz,  $\text{C}_6\text{D}_6$ , 298 K) showing the reaction of  $[\text{Ru}(\text{PPh}_3)_2(\text{C}_6\text{H}_4\text{PPh}_2)(\text{ZnMe})_2][\text{BAr}^{\text{F}}_4]$  (**3**) with IMes at (a) 30 min and (b) 24 h after addition of 1 equiv IMes, and (c) 10 min after further addition of a second equivalent of the NHC.

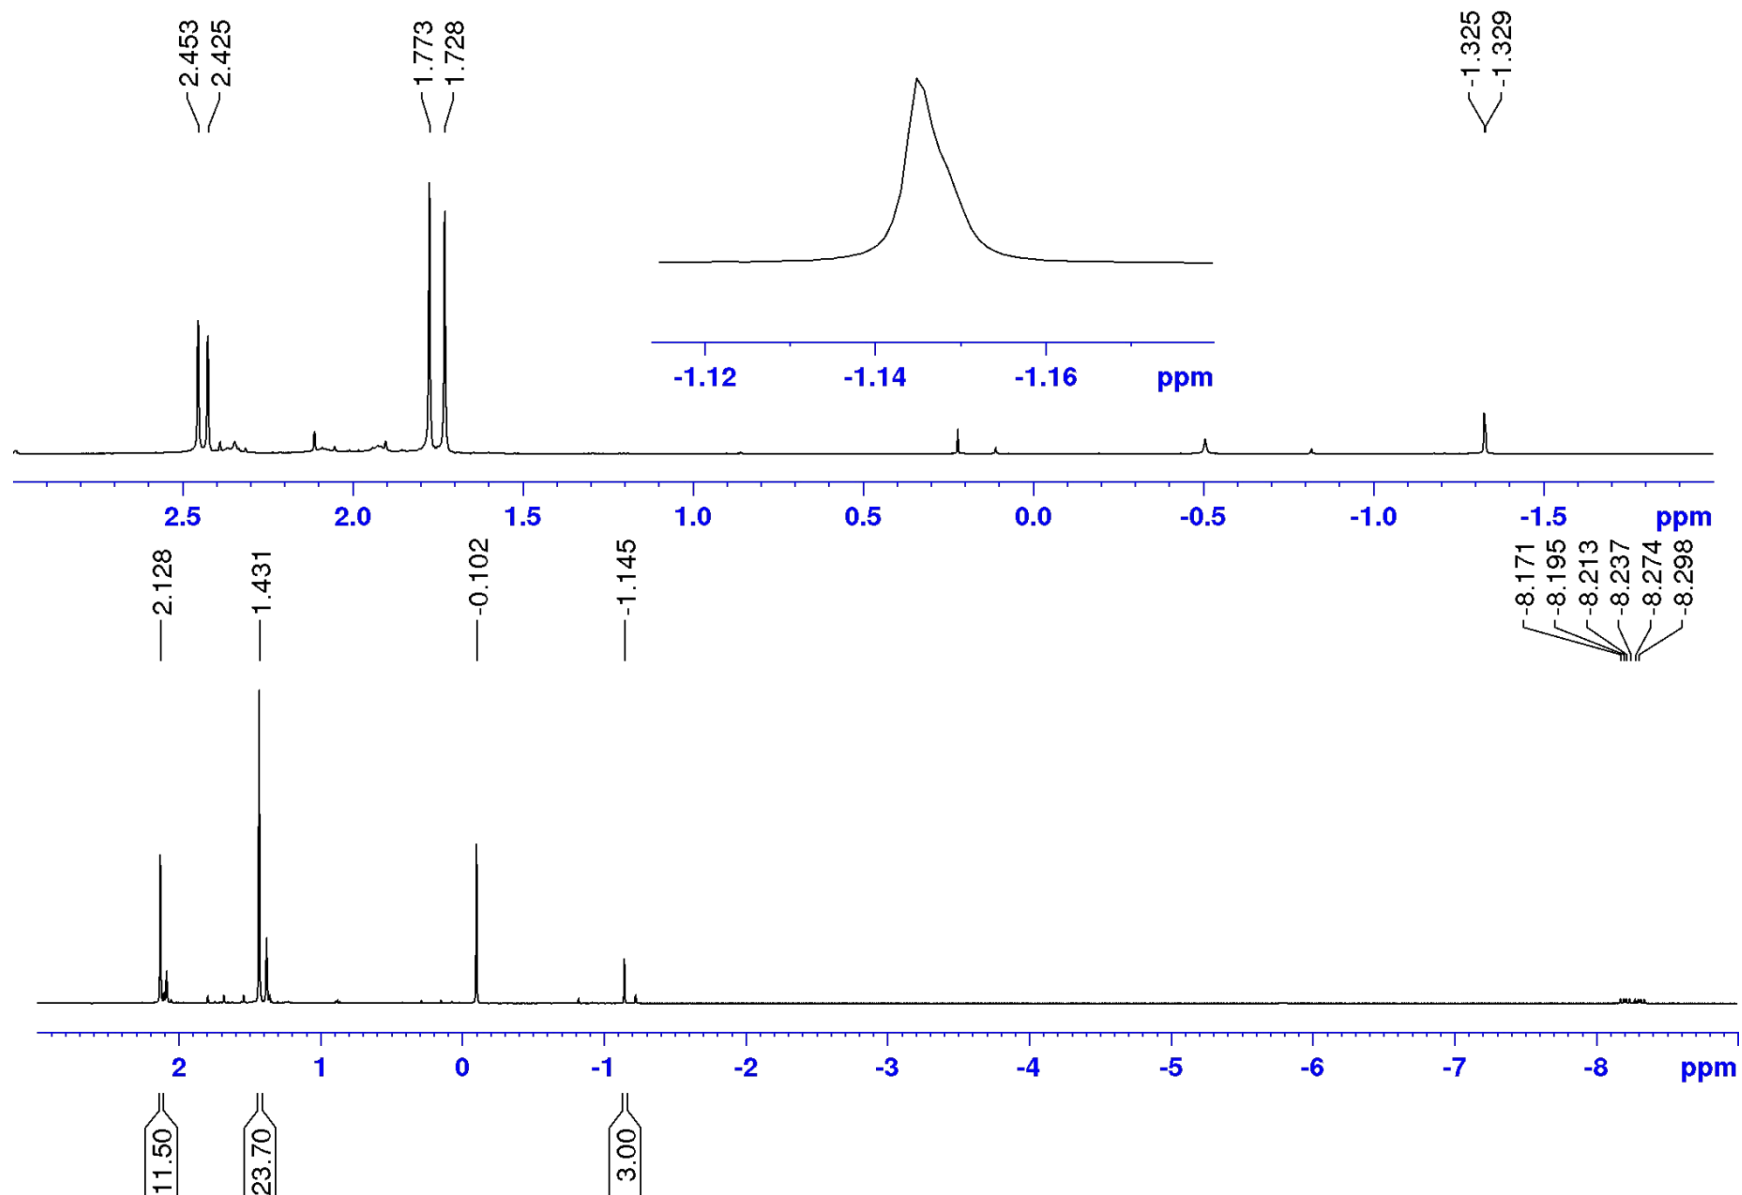

**Figure S18.** (Bottom) Low frequency of the  $^1\text{H}$  NMR spectrum (400 MHz,  $\text{C}_6\text{D}_6$ , 298 K) of the reaction of  $[\text{Ru}(\text{PPh}_3)_2(\text{C}_6\text{H}_4\text{PPh}_2)(\text{ZnMe})_2][\text{BAr}^{\text{F}}_4]$  (**3**) with 2 equiv IMes and (top) methyl region of after removal of the  $\text{C}_6\text{D}_6$  and dissolution of the residue in  $\text{CD}_2\text{Cl}_2$  to confirm formation of  $[(\text{IMes})_2\text{ZnMe}]^{+2}$ .

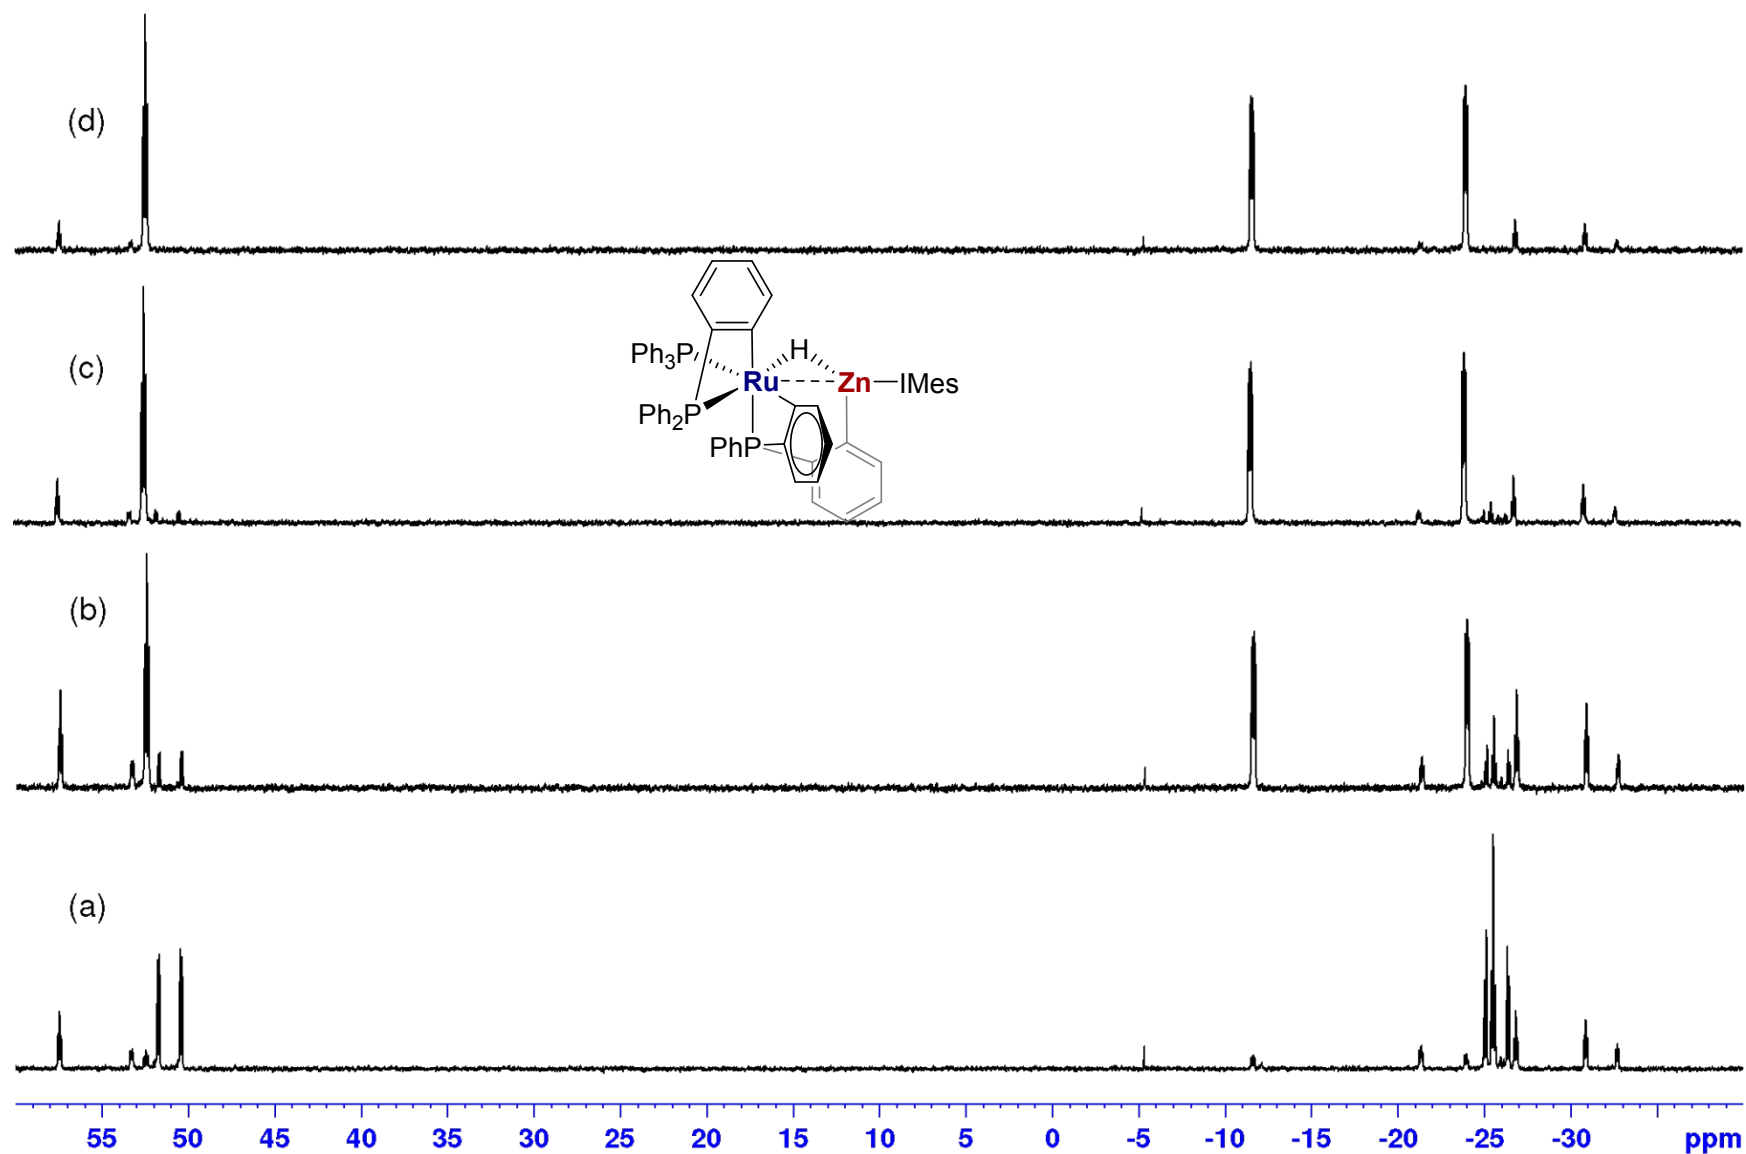

**Figure S19.**  $^{31}\text{P}\{^1\text{H}\}$  NMR spectra (202 MHz,  $\text{C}_6\text{D}_6$ , 298 K) of the room temperature reaction of  $[\text{Ru}(\text{PPh}_3)(\text{C}_6\text{H}_4\text{PPh}_2)_2(\text{ZnMe})_2]$  (**2**) with IMes (2 equiv) to give  $[\text{Ru}(\text{PPh}_3)(\text{C}_6\text{H}_4\text{PPh}_2)(\text{PPh}(\text{C}_6\text{H}_4)_2\text{Zn}(\text{IMes}))\text{H}]$  (**7**) after (a) 15 min, (b) 1 h 15 min, (c) 2 h 45 min and (d) 24 h. See Figures S20 and S21 for more details.

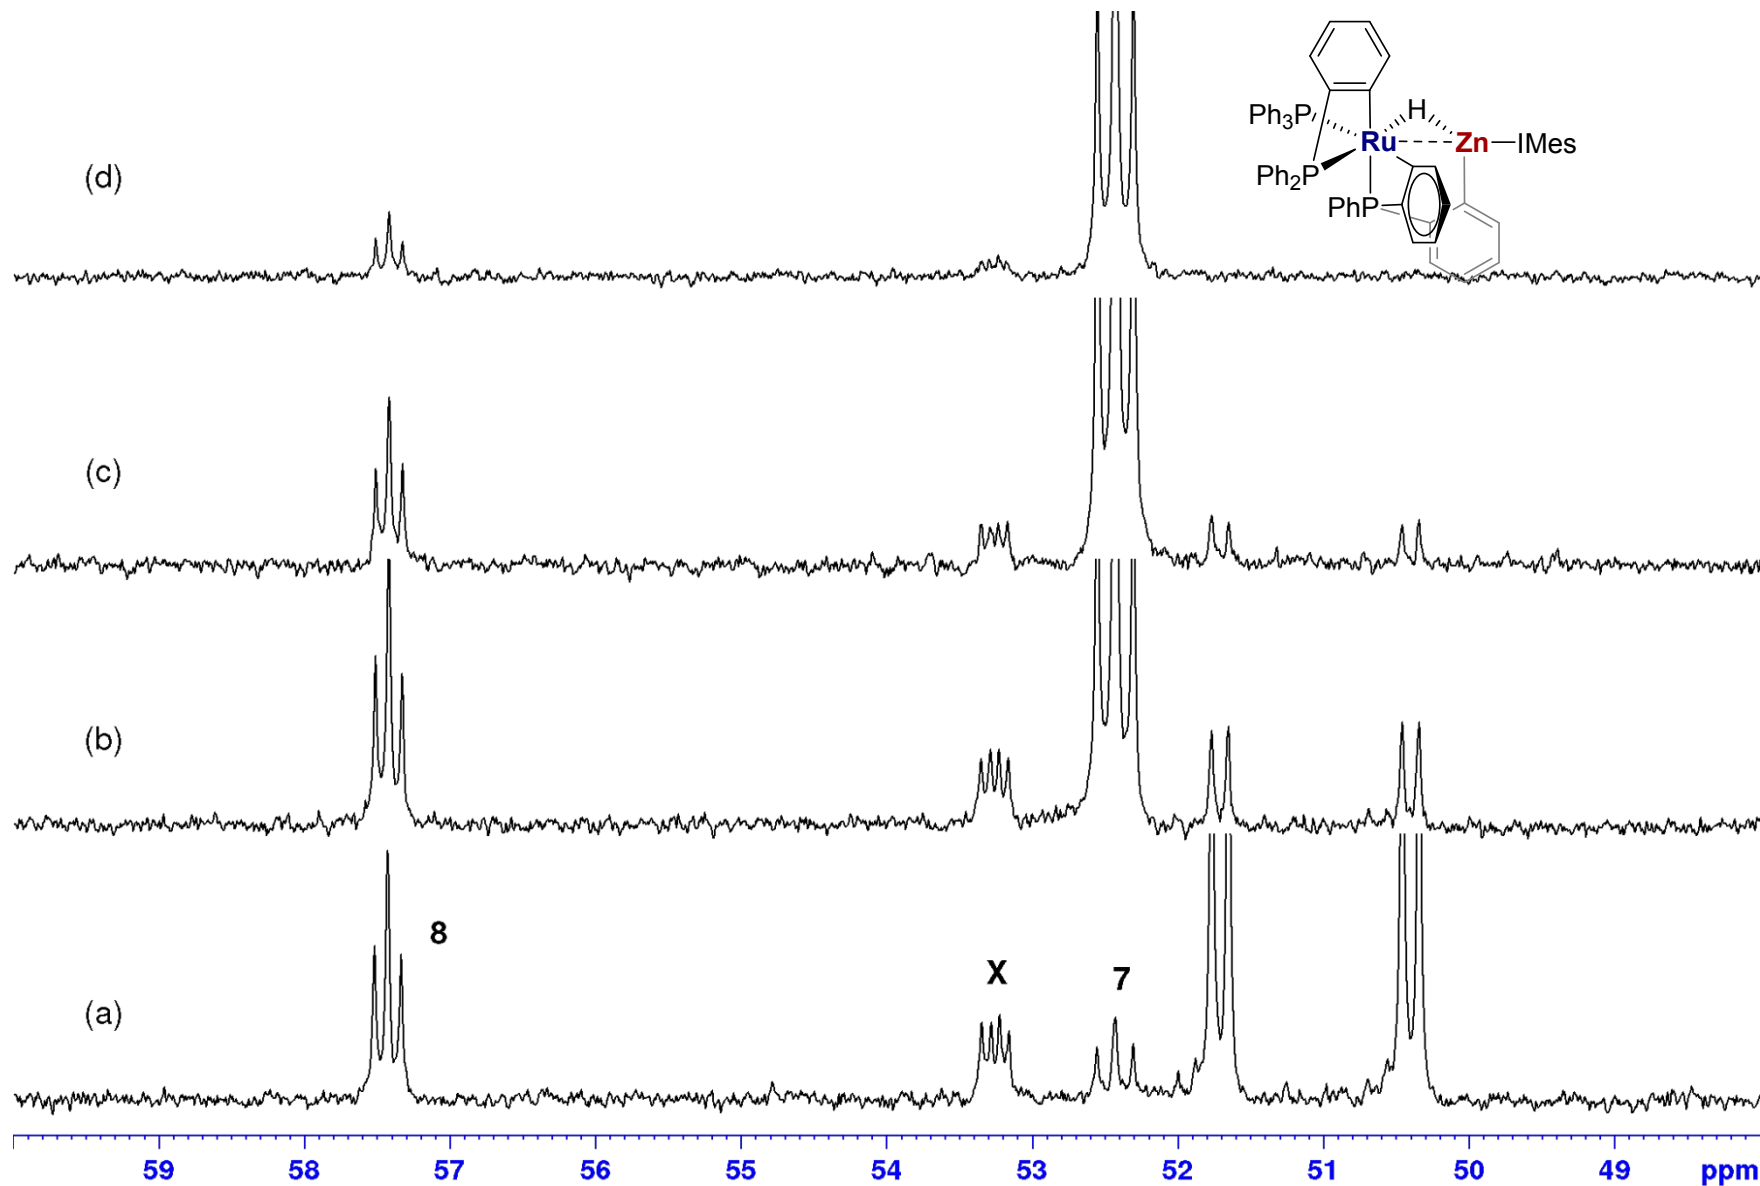

**Figure S20.** High frequency region of  $^{31}\text{P}\{^1\text{H}\}$  NMR spectra from Figure S19 again shown after (a) 15 min, (b) 1 h 15 min, (c) 2 h 45 min and (d) 24 h highlighting the appearance of signals for  $[\text{Ru}(\text{PPh}_3)(\text{C}_6\text{H}_4\text{PPh}_2)(\text{PPh}(\text{C}_6\text{H}_4)_2\text{Zn}(\text{IMes}))\text{H}]$  (7) and minor isomer **8**, as well as unknown intermediate **X**.

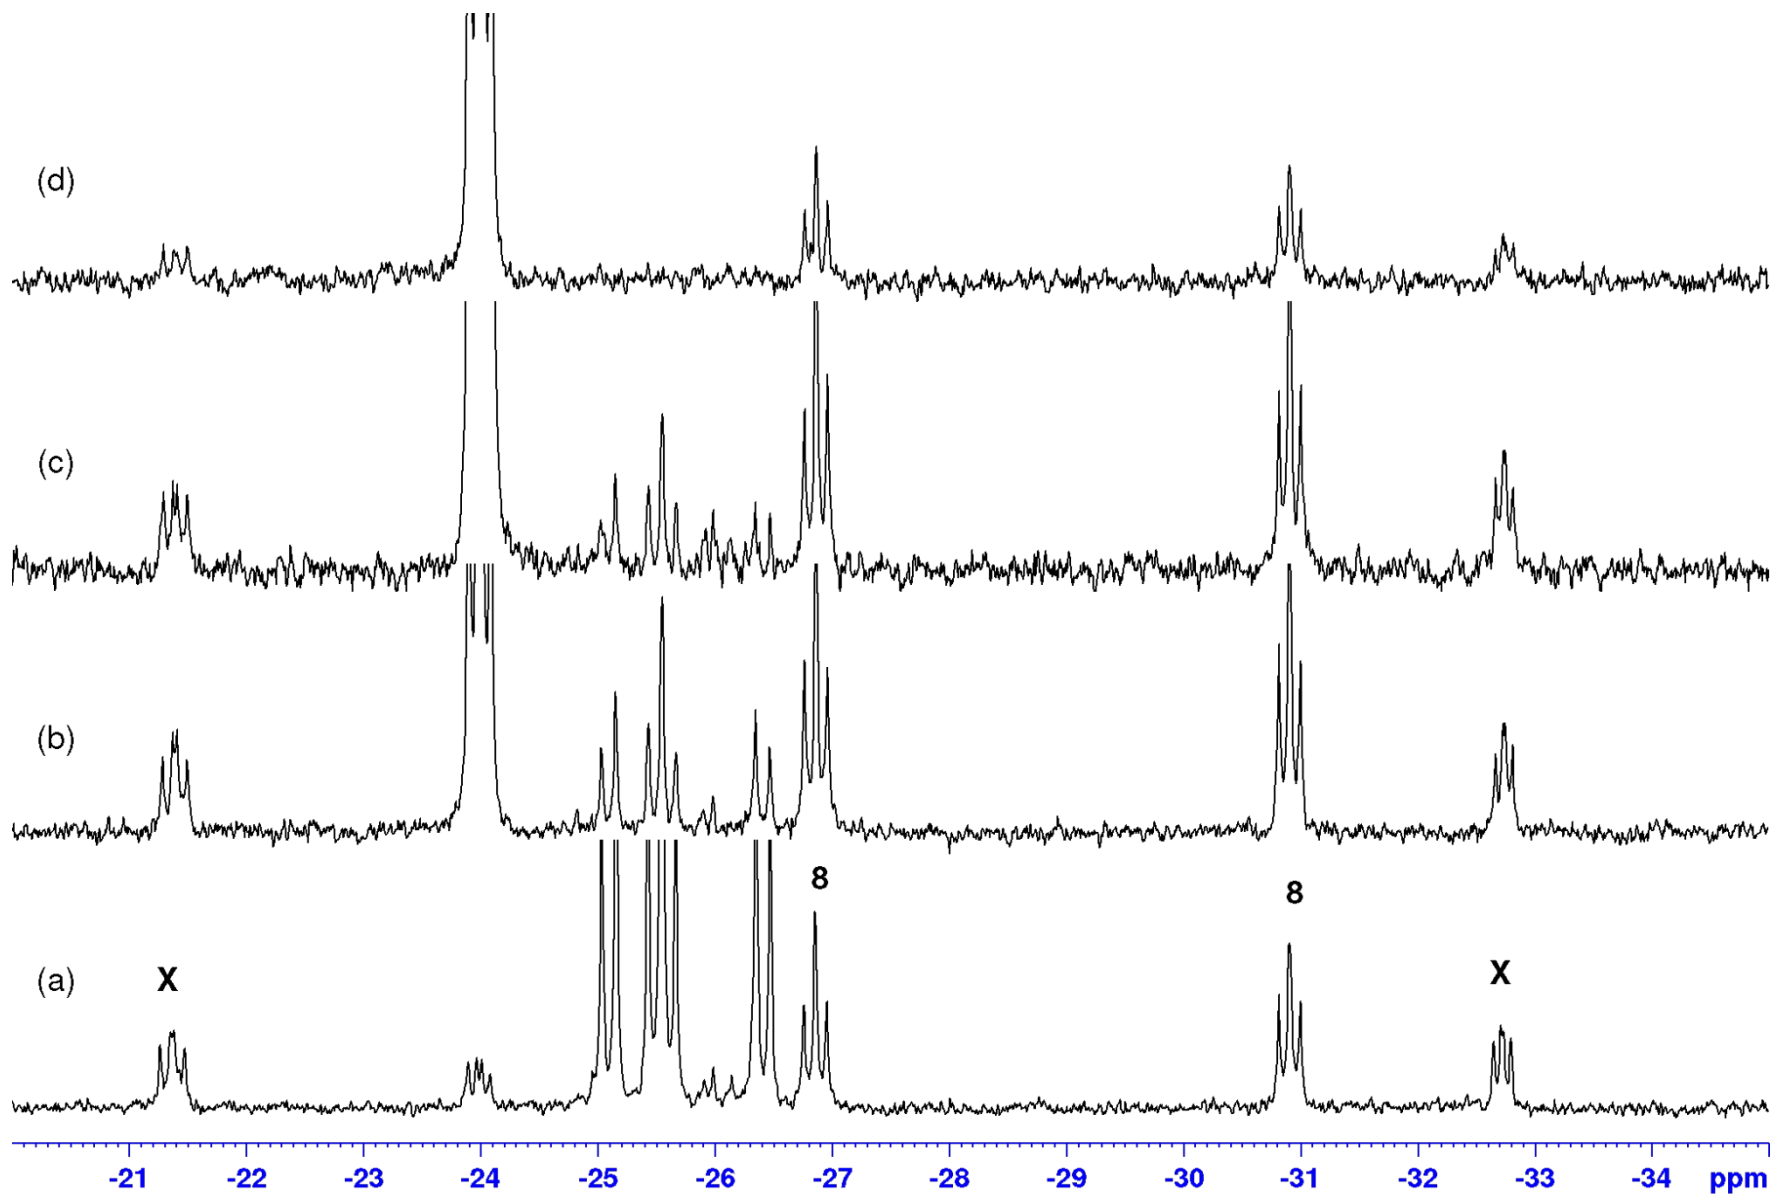

**Figure S21.** Low frequency region of  $^{31}\text{P}\{^1\text{H}\}$  NMR spectra from Figure S19 again shown after (a) 15 min, (b) 1 h 15 min, (c) 2 h 45 min and (d) 24 h highlighting the appearance of signals for **8**, and the unknown intermediate **X**.

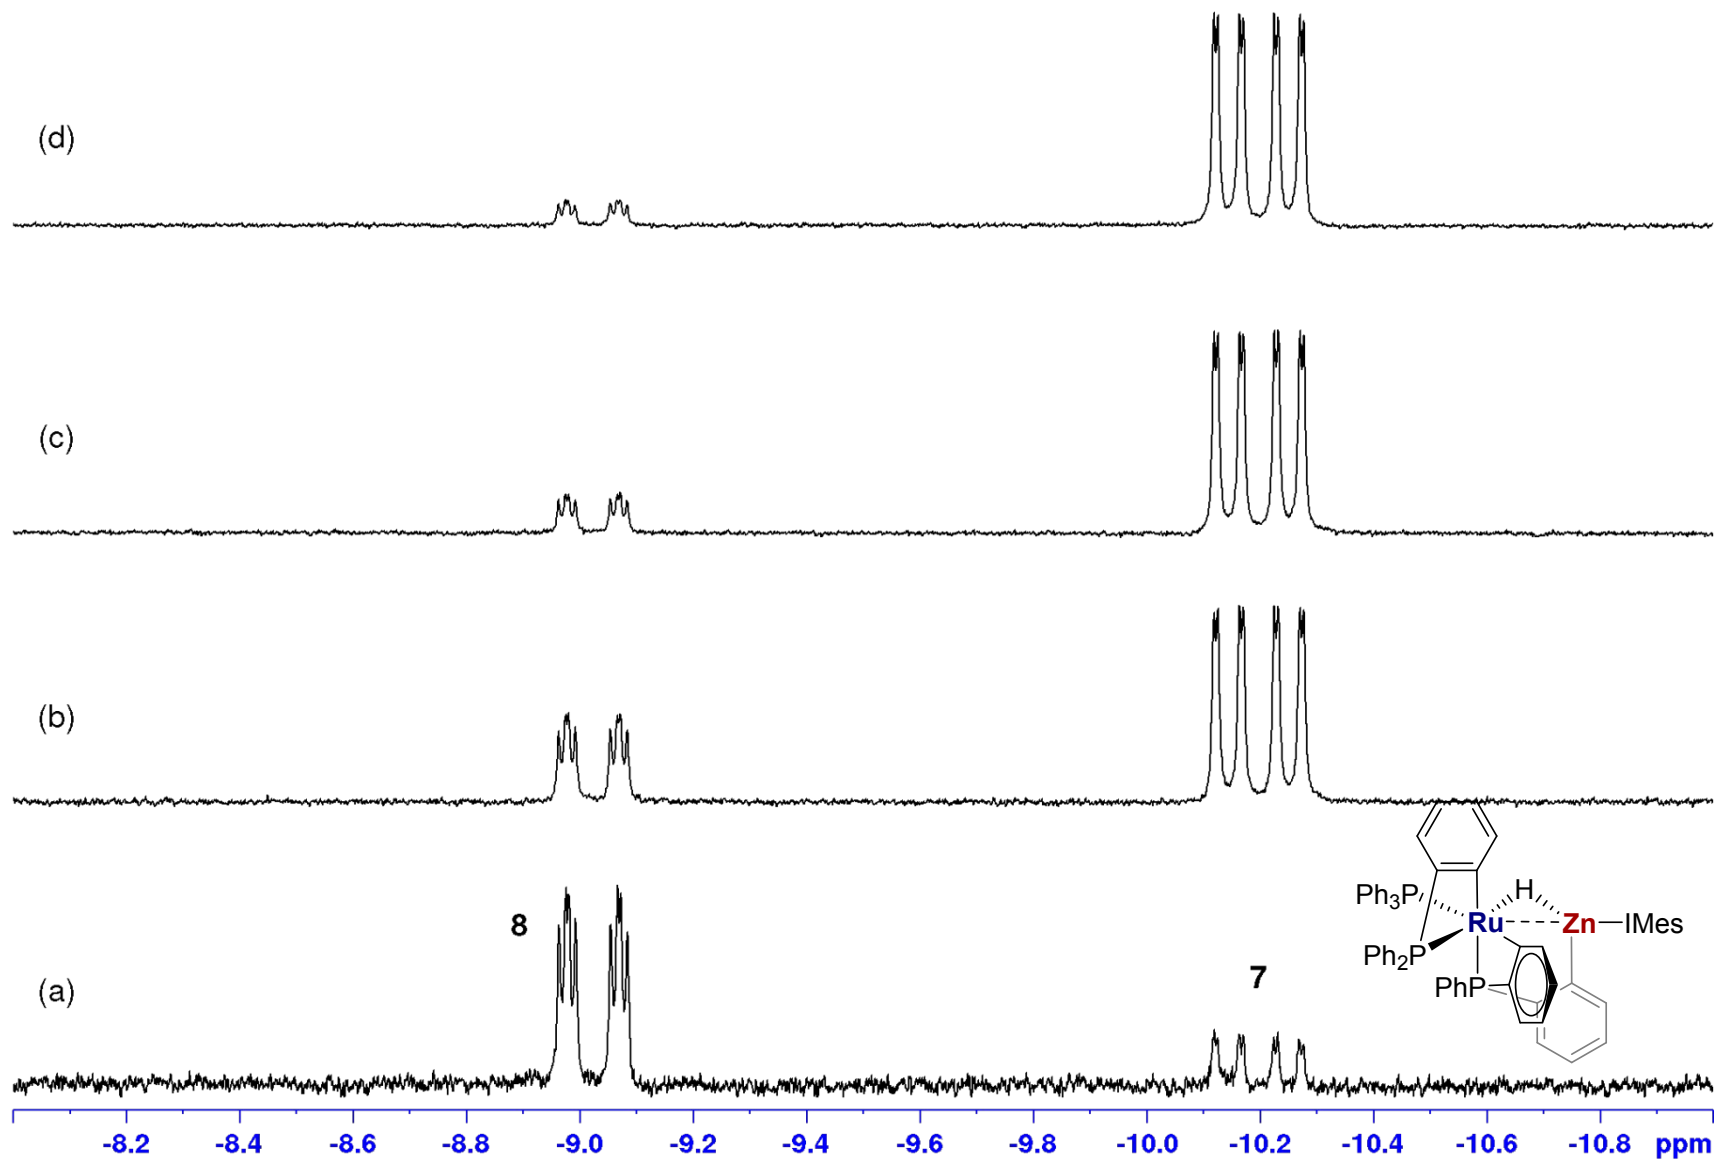

**Figure S22.** Hydride region of  $^1\text{H}$  NMR spectra (500 MHz,  $\text{C}_6\text{D}_6$ , 298 K) of the room temperature reaction of  $[\text{Ru}(\text{PPh}_3)(\text{C}_6\text{H}_4\text{PPh}_2)_2(\text{ZnMe})_2]$  (**2**) with 2 equiv IMes after (a) 15 min, (b) 1 h 15 min, (c) 2 h 45 min and (d) 24 h showing the variation of  $[\text{Ru}(\text{PPh}_3)(\text{C}_6\text{H}_4\text{PPh}_2)(\text{PPh}(\text{C}_6\text{H}_4)_2\text{Zn}(\text{IMes}))\text{H}]$  (**7**) and **8**.



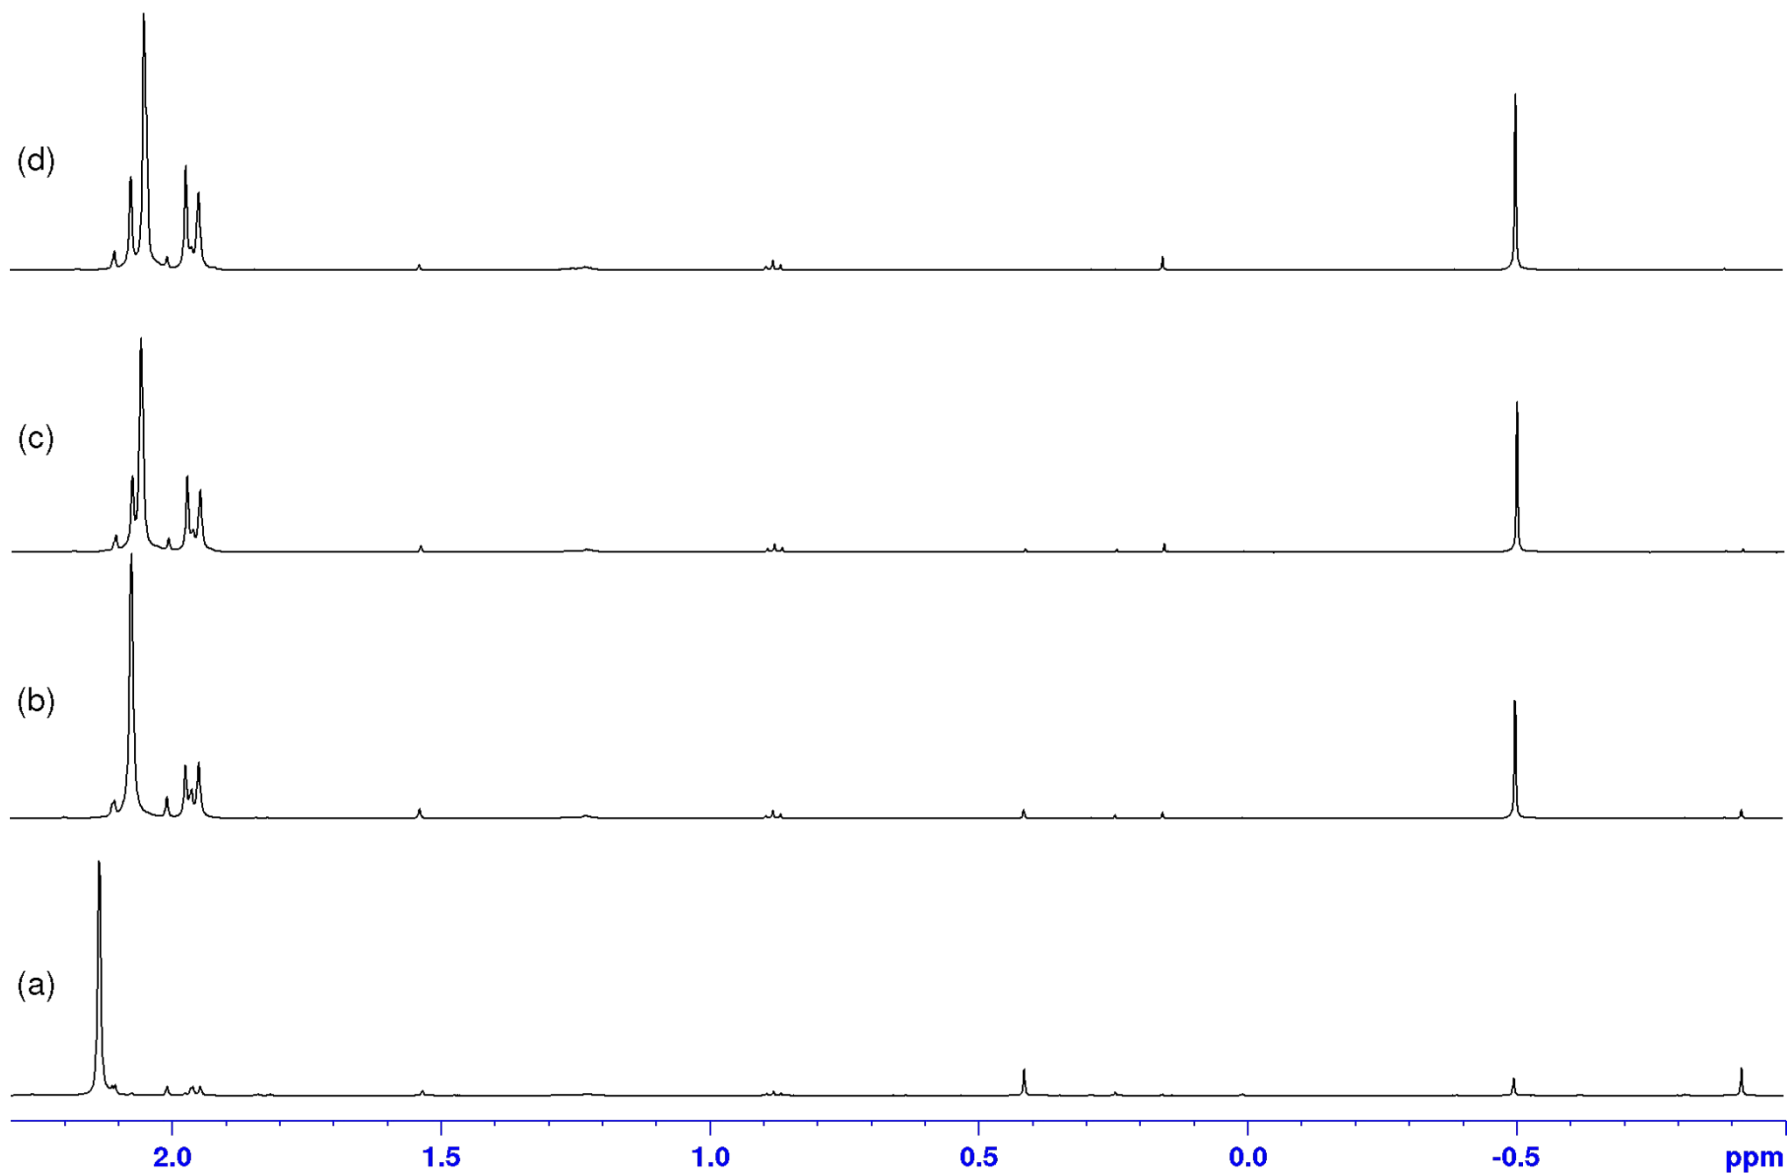

**Figure S23.**  $^1\text{H}$  NMR spectra (500 MHz,  $\text{C}_6\text{D}_6$ , 298 K) of the room temperature reaction of  $[\text{Ru}(\text{PPh}_3)(\text{C}_6\text{H}_4\text{PPh}_2)_2(\text{ZnMe}_2)]$  (**2**) with IMes (2 equiv) after (a) 15 min, (b) 1 h 15 min, (c) 2 h 45 min and (d) 24 h showing the formation of  $(\text{IMes})\text{ZnMe}_2$  at ca.  $\delta$  -0.5.<sup>3</sup>

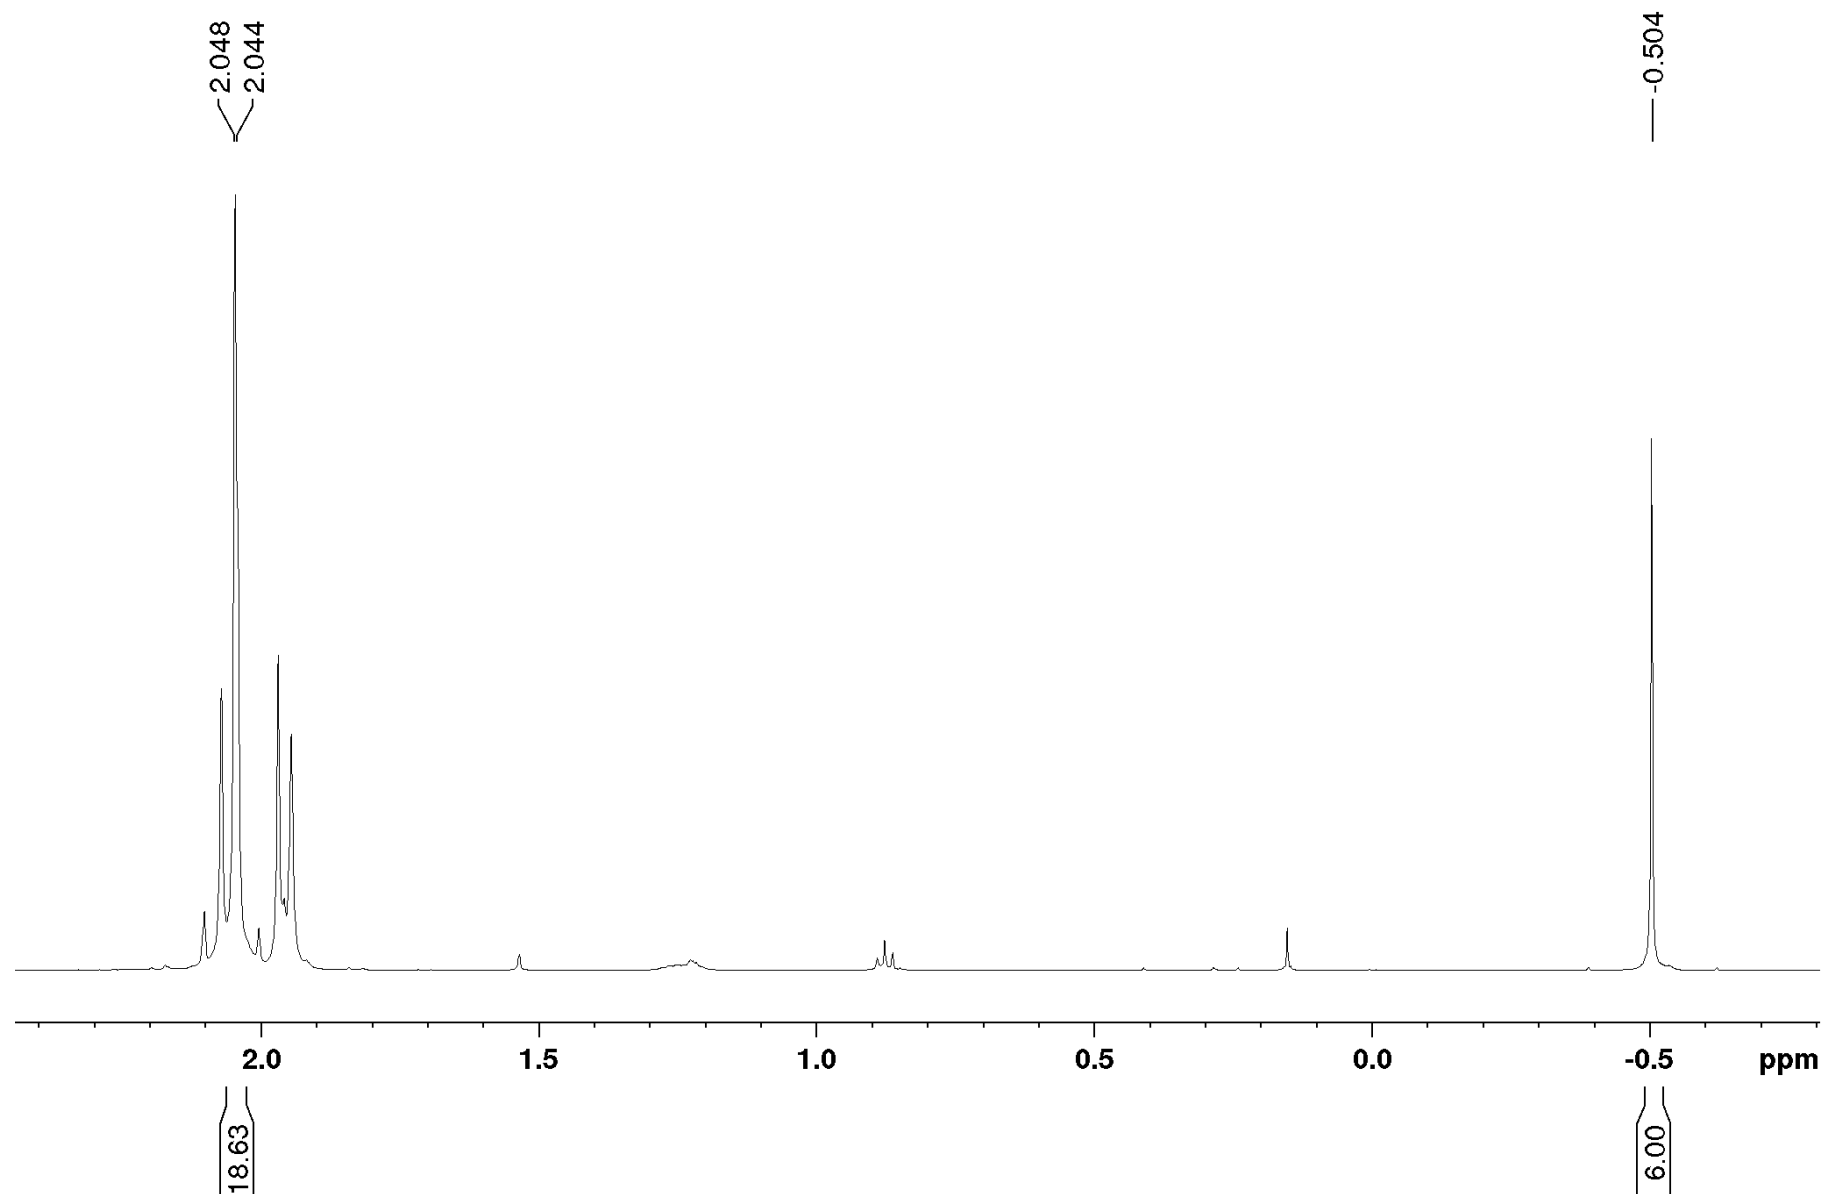

**Figure S24.** <sup>1</sup>H NMR spectrum (500 MHz, C<sub>6</sub>D<sub>6</sub>, 298 K) recorded 24 h into the room temperature reaction of [Ru(PPh<sub>3</sub>)(C<sub>6</sub>H<sub>4</sub>PPh<sub>2</sub>)<sub>2</sub>(ZnMe<sub>2</sub>)<sub>2</sub>] (**2**) with IMes (2 equiv) highlighting the methyl resonances assigned to (IMes)ZnMe<sub>2</sub>.<sup>3</sup>

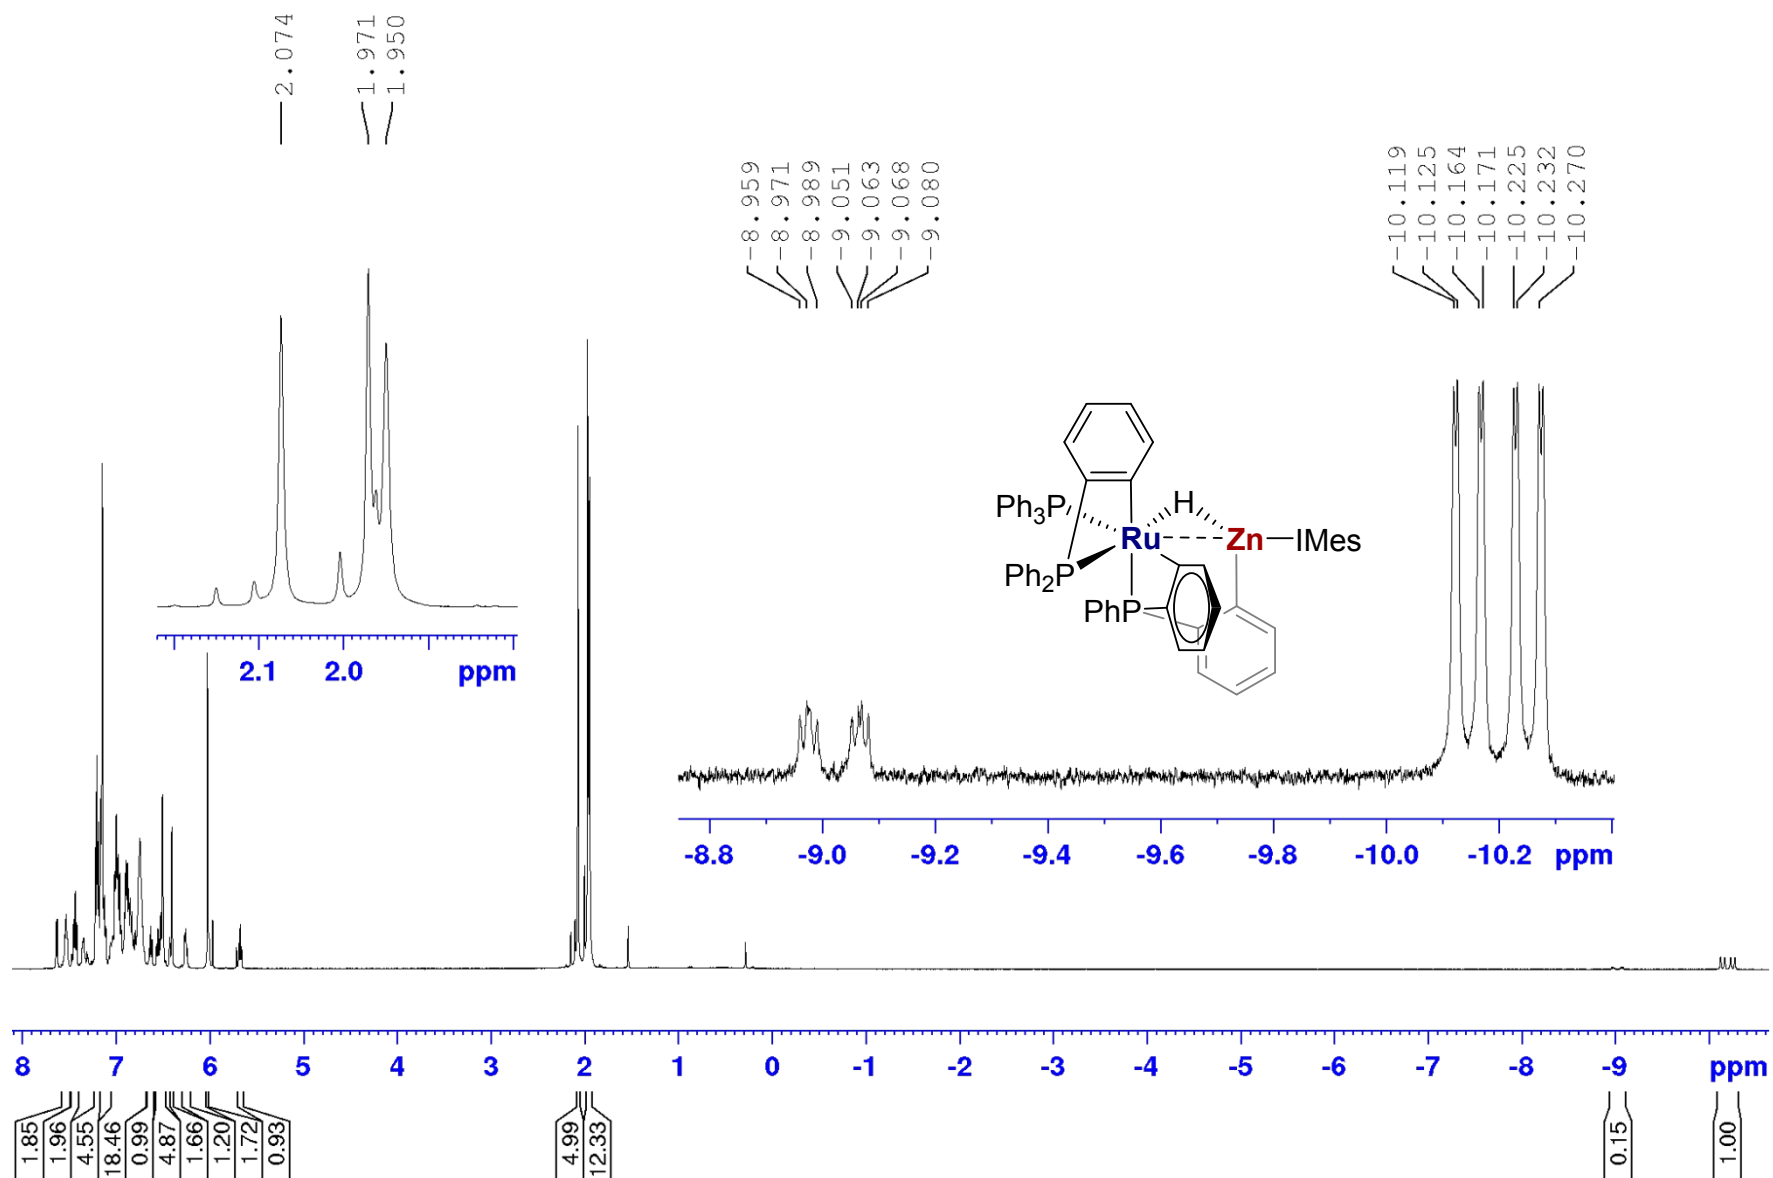

**Figure S25.**  $^1H$  NMR spectrum (500 MHz,  $C_6D_6$ , 298 K) of  $[Ru(PPh_3)(C_6H_4PPh_2)(PPh(C_6H_4)_2Zn(IMes))H]$  (7), with inset of Ru-H-Zn (highlighting the presence of 7 and minor isomer 8) and IMes regions. NB aromatic signals fail to integrate due to partial overlap with residual  $C_6D_5H$ .

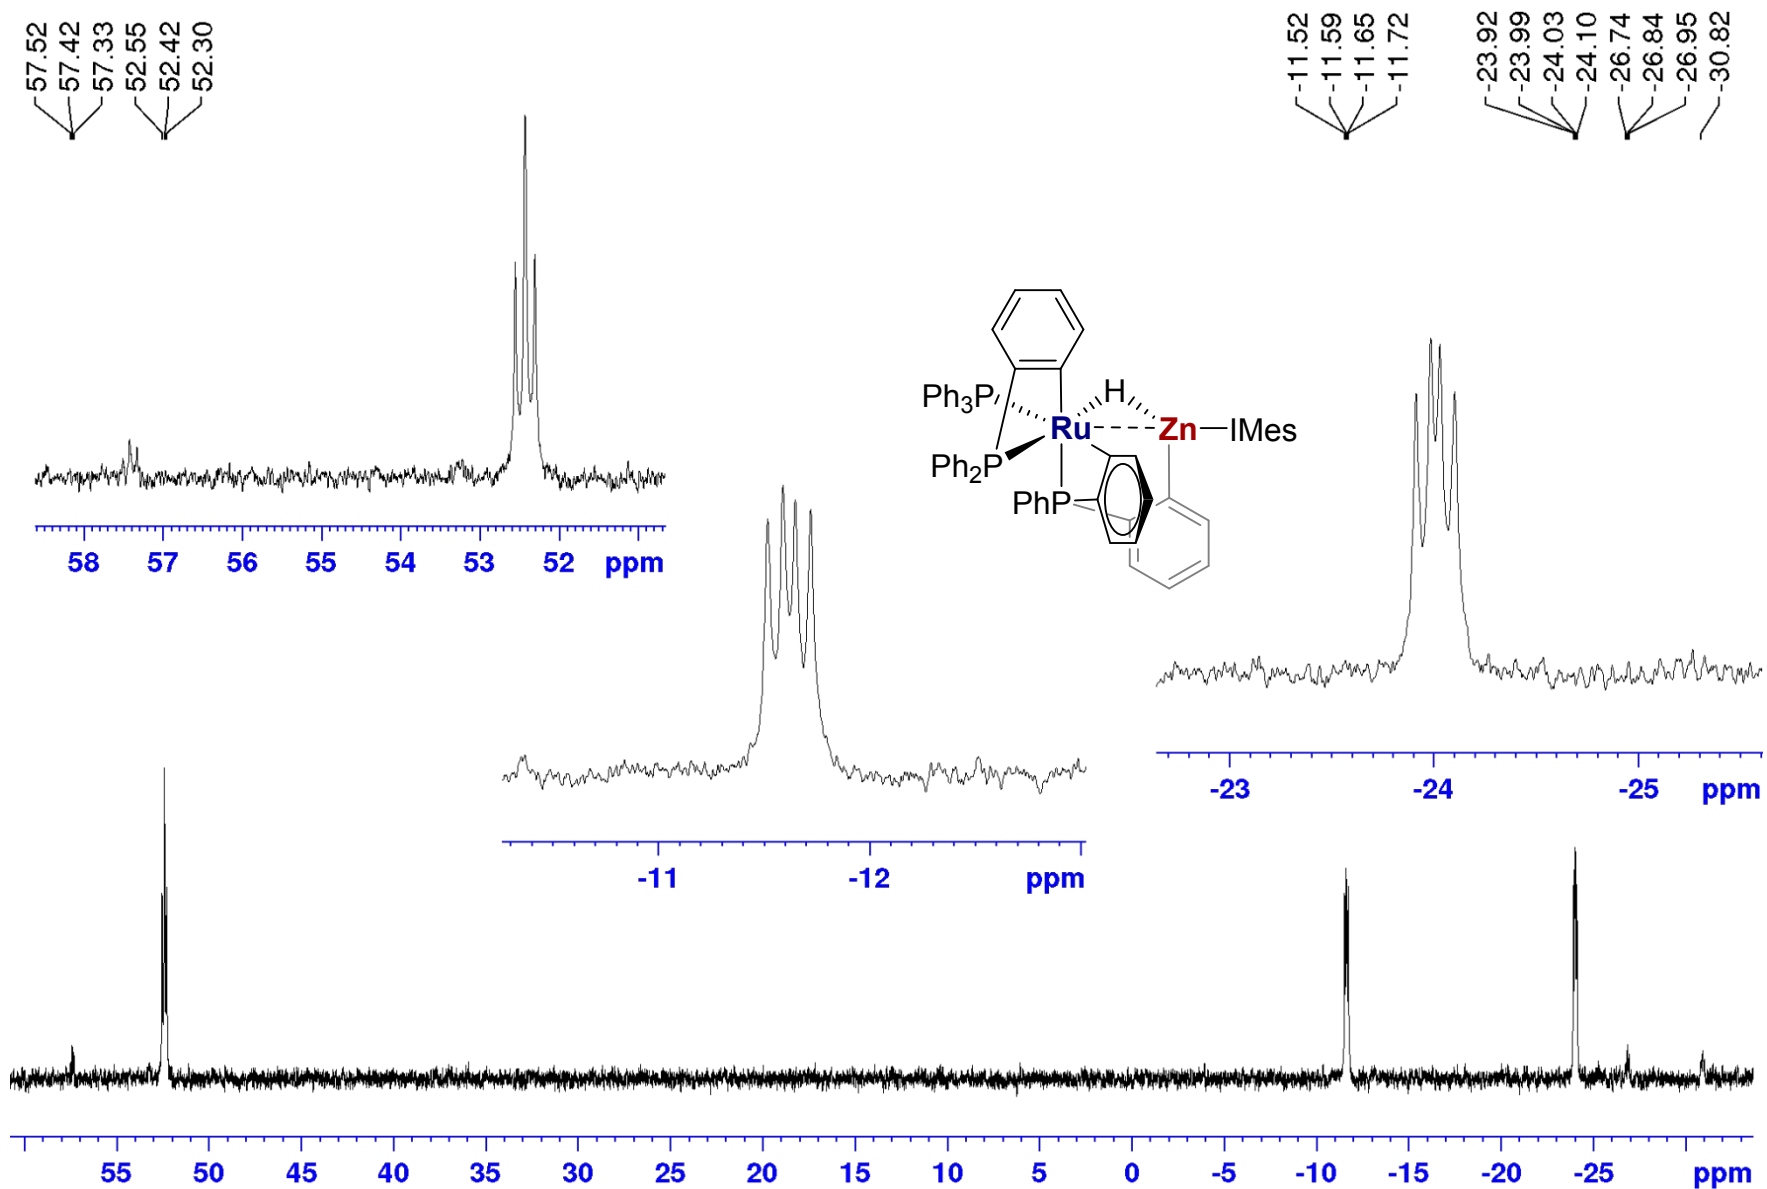

**Figure S26.**  $^{31}\text{P}\{^1\text{H}\}$  NMR spectrum (202 MHz,  $\text{C}_6\text{D}_6$ , 298 K) of  $[\text{Ru}(\text{PPh}_3)(\text{C}_6\text{H}_4\text{PPh}_2)(\text{PPh}(\text{C}_6\text{H}_4)_2\text{Zn}(\text{IMes}))\text{H}]$  (7), showing both 7 and minor isomer 8.

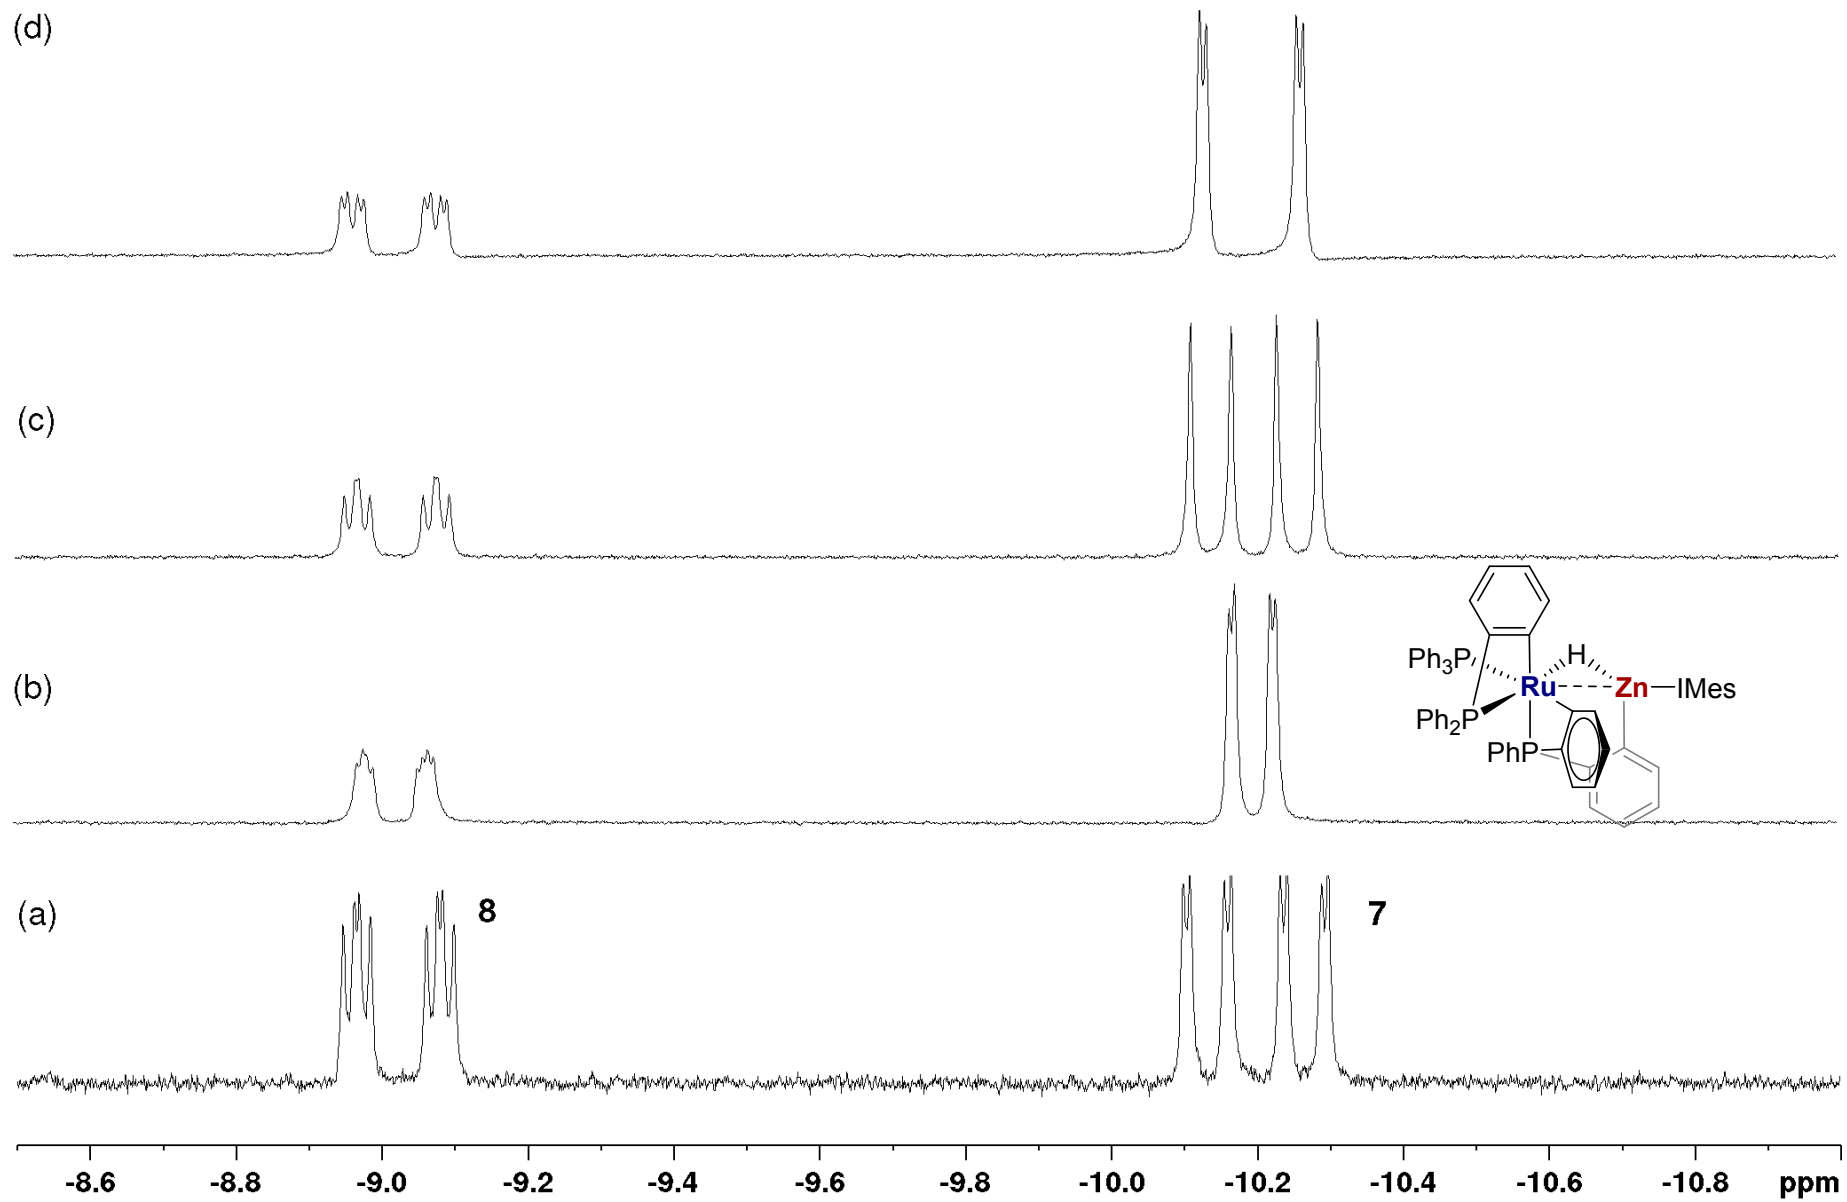

**Figure S27.** Selective  $^{31}\text{P}$  decoupling at (b)  $\delta$  52, (c)  $\delta$  -12 and (d)  $\delta$  -24 showing the impact on the hydride signal (400 MHz,  $\text{C}_6\text{D}_6$ , 298 K) of 7 (a).

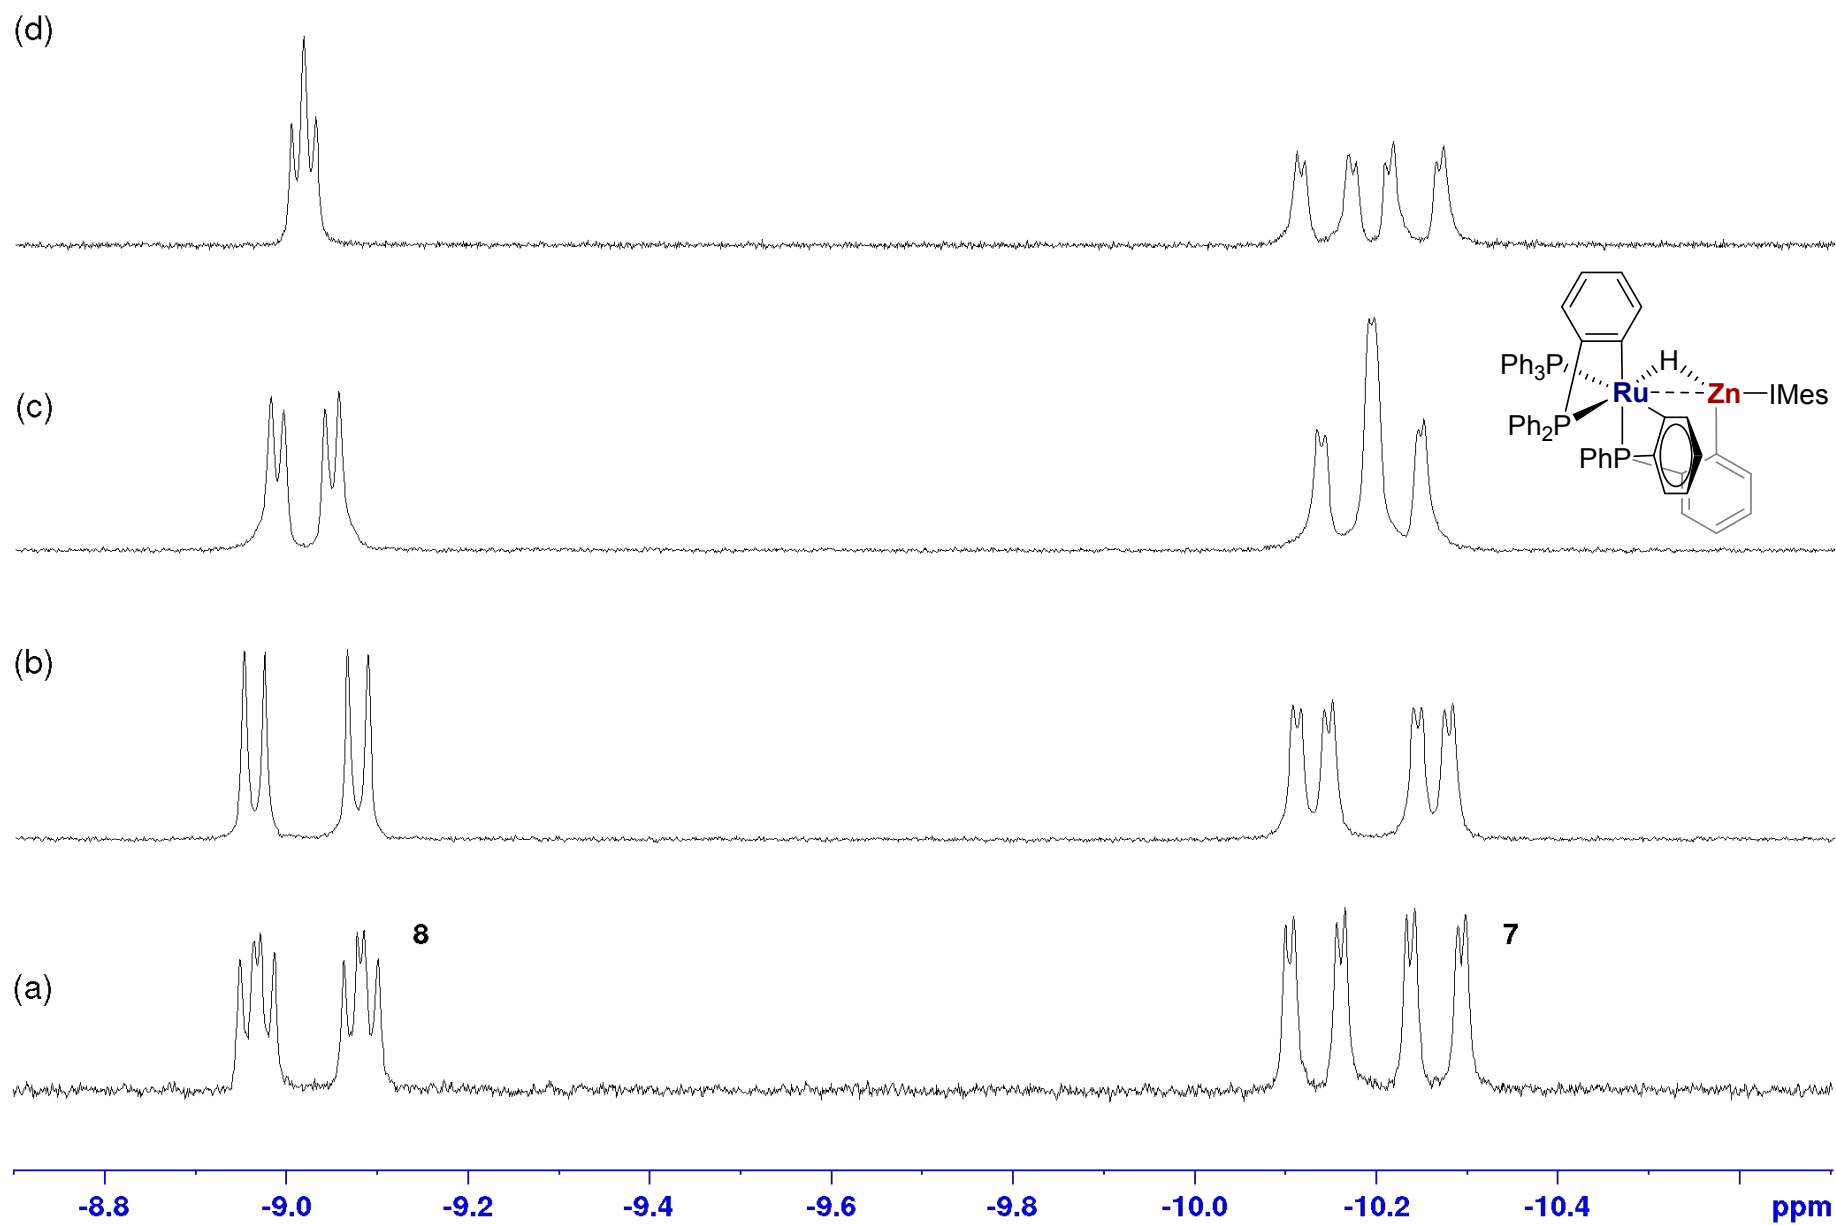

**Figure S28.** Selective  $^{31}\text{P}$  decoupling at (b)  $\delta$  57, (c)  $\delta$  -27 and (d)  $\delta$  -31 showing the impact on the hydride signal (400 MHz,  $\text{C}_6\text{D}_6$ , 298 K) of **8** (a).

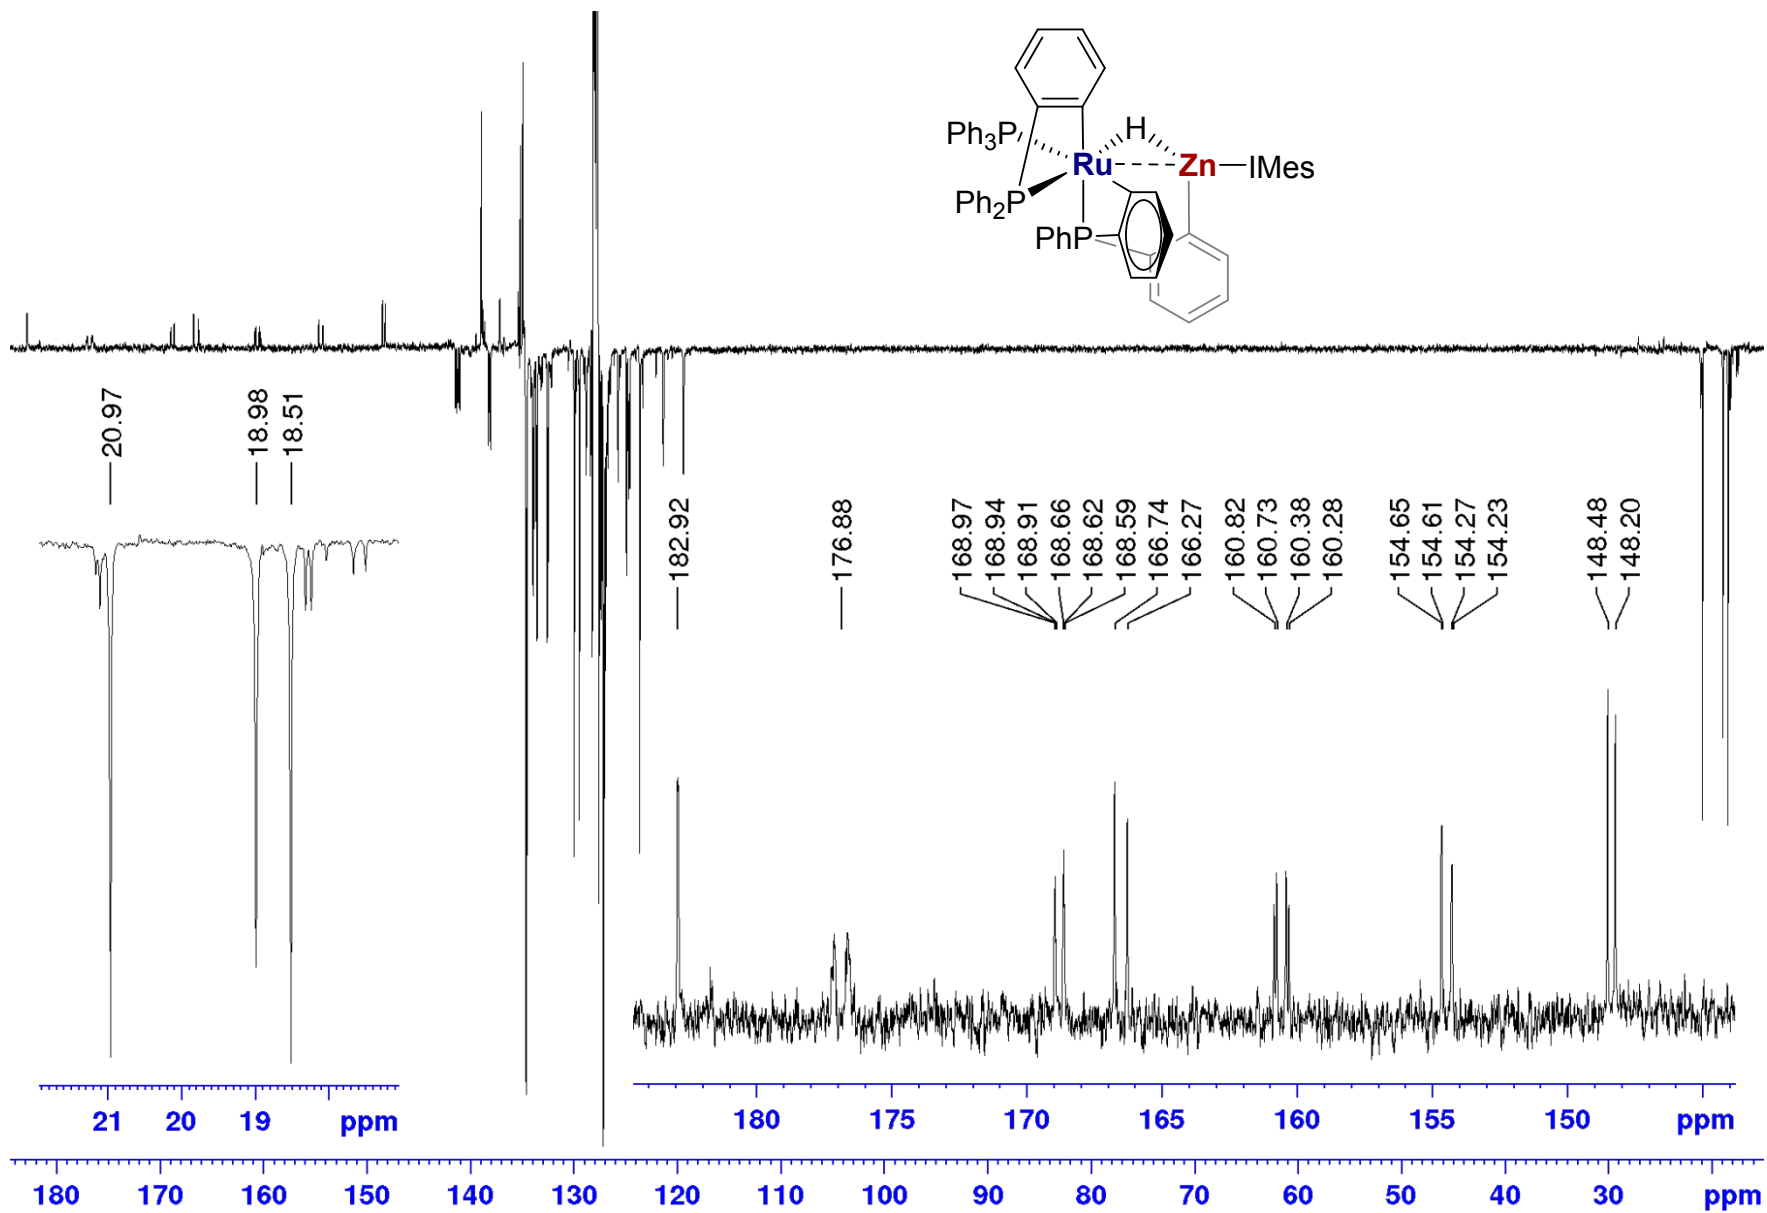

**Figure S29.**  $^{13}\text{C}\{^1\text{H}\}$  (PENDANT) NMR spectrum (126 MHz,  $\text{C}_6\text{D}_6$ , 298 K) of  $[\text{Ru}(\text{PPh}_3)(\text{C}_6\text{H}_4\text{PPh}_2)(\text{PPh}(\text{C}_6\text{H}_4)_2\text{Zn}(\text{IMes}))\text{H}]$  (7), with insets of high frequency resonances.

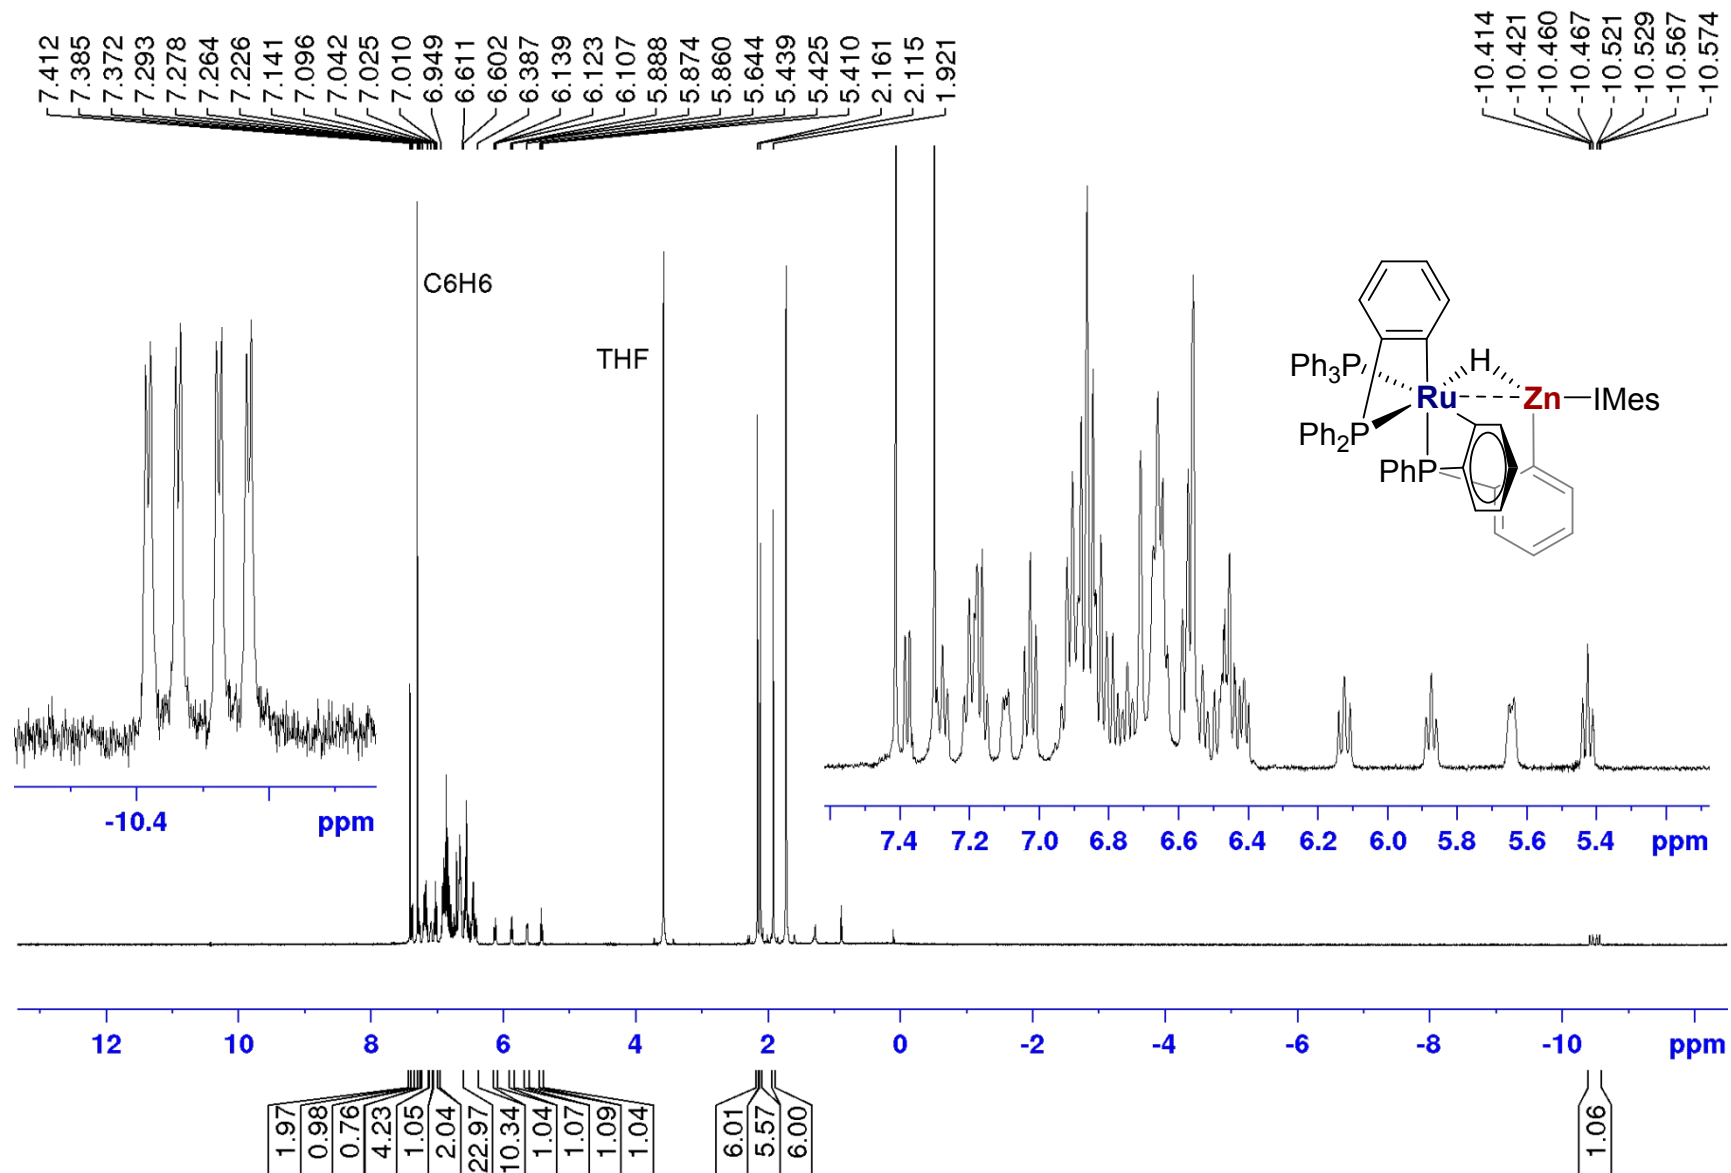

**Figure S30.**  $^1\text{H}$  NMR spectrum (500 MHz,  $\text{THF-}d_8$ , 298 K) of  $[\text{Ru}(\text{PPh}_3)(\text{C}_6\text{H}_4\text{PPh}_2)(\text{PPh}(\text{C}_6\text{H}_4)_2\text{Zn}(\text{IMes}))\text{H}]$  (7), with inset of high frequency aryl and low frequency Ru-H-Zn regions.



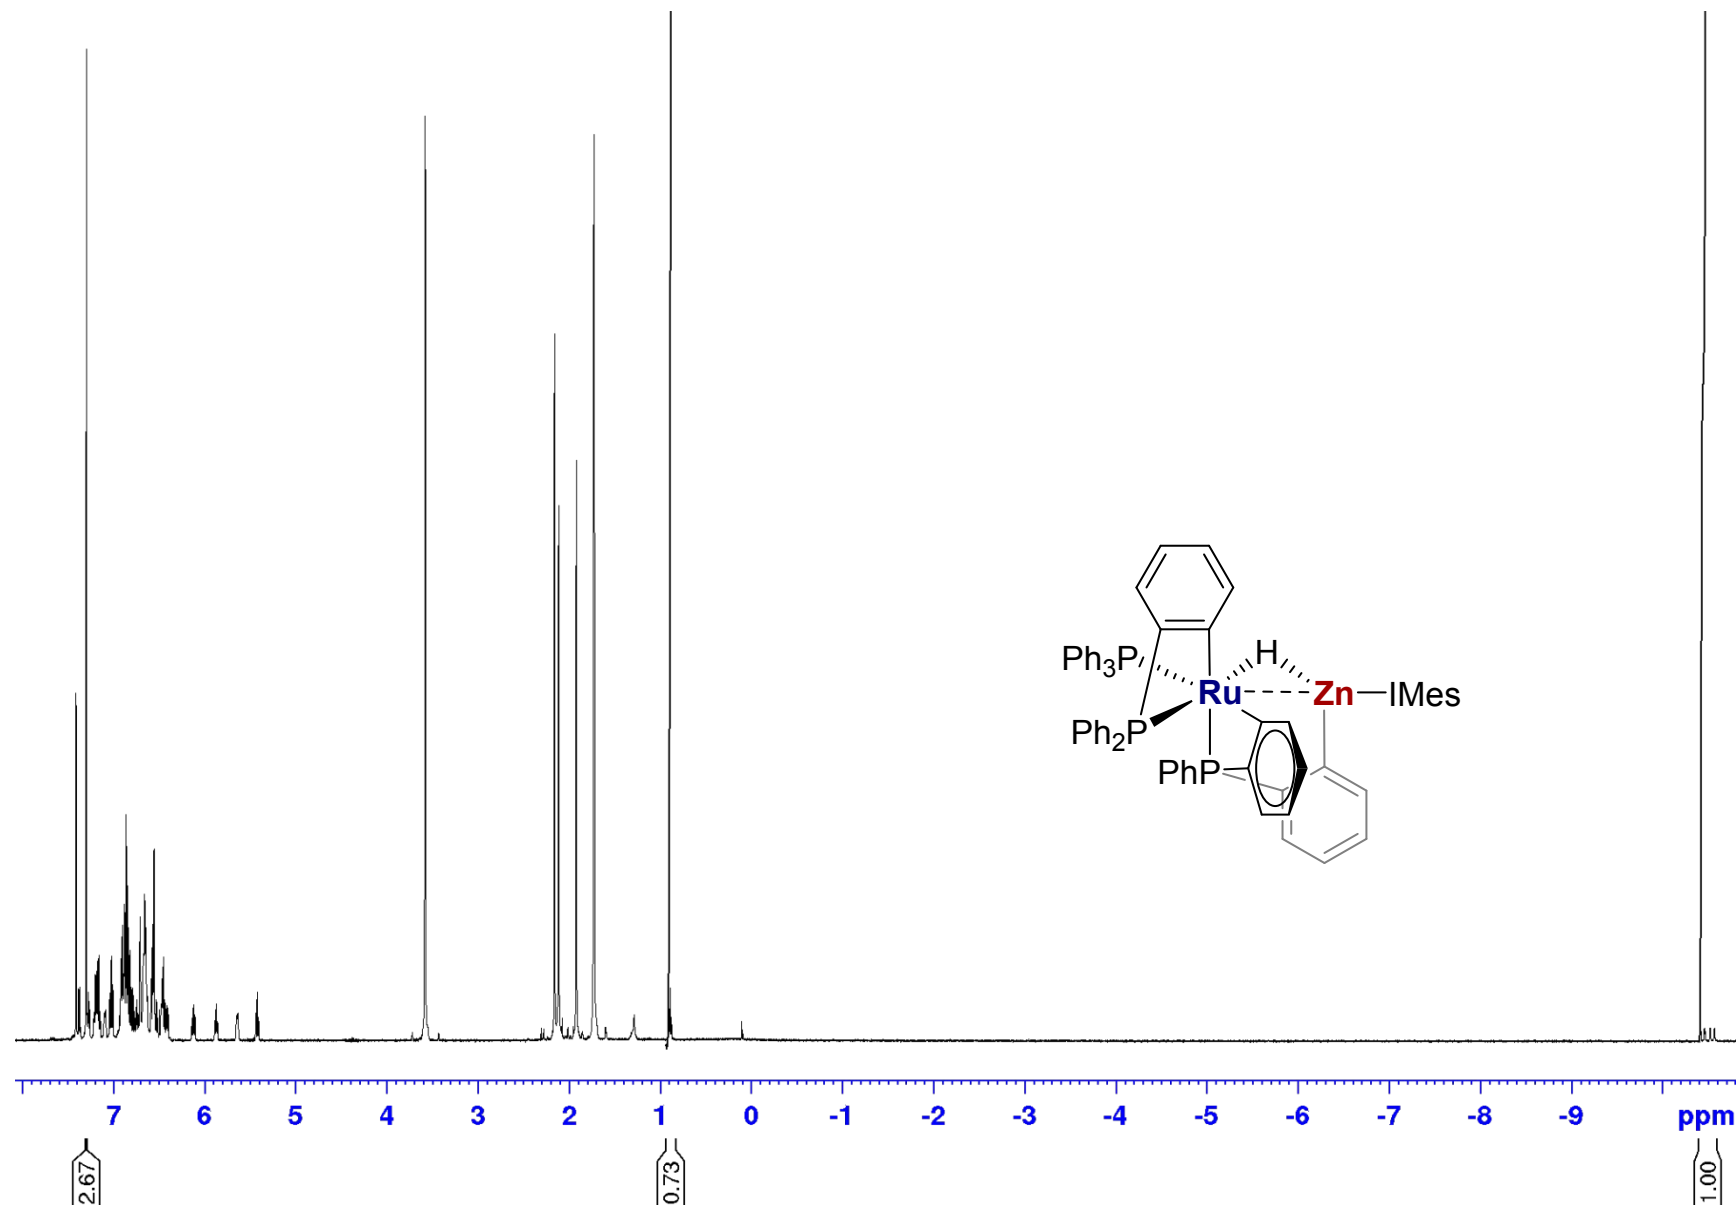

**Figure S31.**  $^1\text{H}$  NMR spectrum (500 MHz,  $\text{THF-}d_8$ , 298 K) of crystalline  $[\text{Ru}(\text{PPh}_3)(\text{C}_6\text{H}_4\text{PPh}_2)(\text{PPh}(\text{C}_6\text{H}_4)_2\text{Zn}(\text{IMes}))\text{H}]$  (7) used in microanalysis, showing integrations of hexane and benzene.

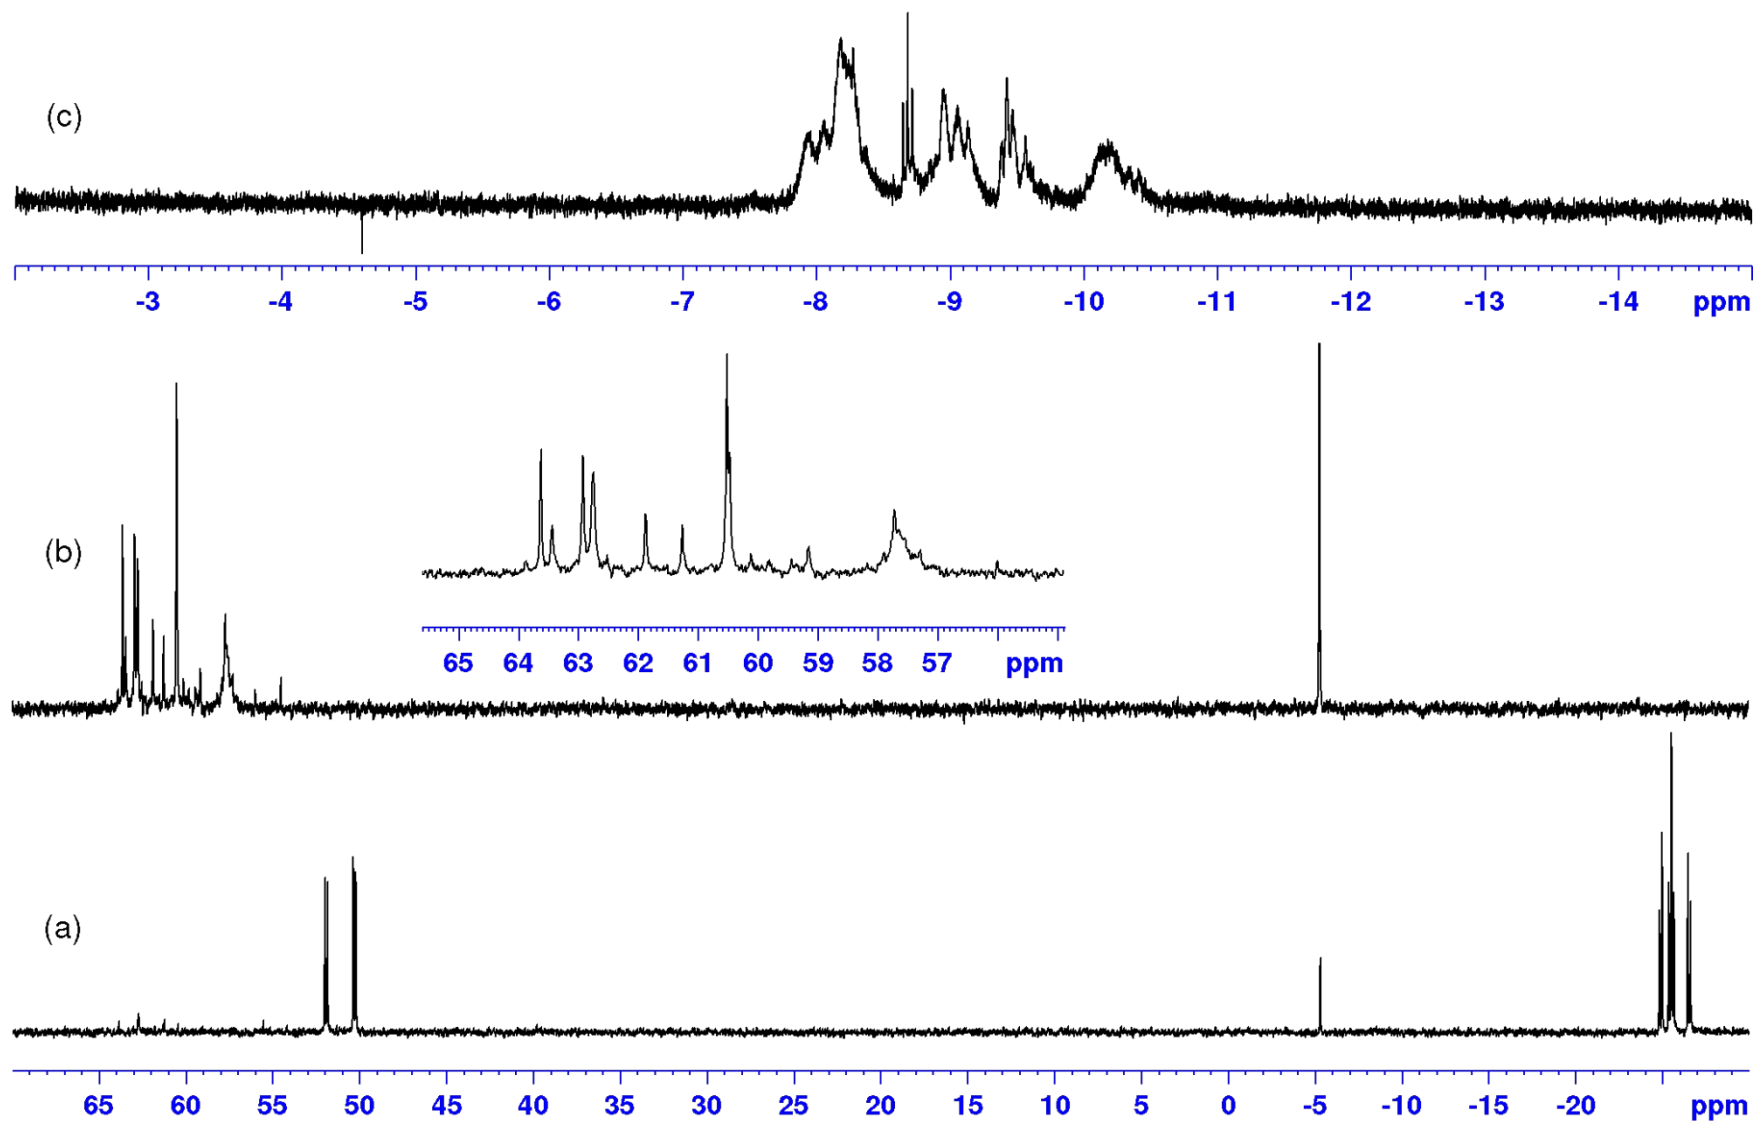

**Figure S32.**  $^{31}\text{P}\{^1\text{H}\}$  NMR spectra (162 MHz,  $\text{C}_6\text{D}_6$ , 298 K) recorded after heating  $[\text{Ru}(\text{PPh}_3)(\text{C}_6\text{H}_4\text{PPh}_2)_2(\text{ZnMe})_2]$  (**2**) at 60 °C under 1 atm  $\text{H}_2$  for (a) 10 min and (b) 2 h. The hydride region of the  $^1\text{H}$  NMR spectrum (400 MHz,  $\text{C}_6\text{D}_6$ , 298 K) measured at  $t = 2$  h is shown in (c).

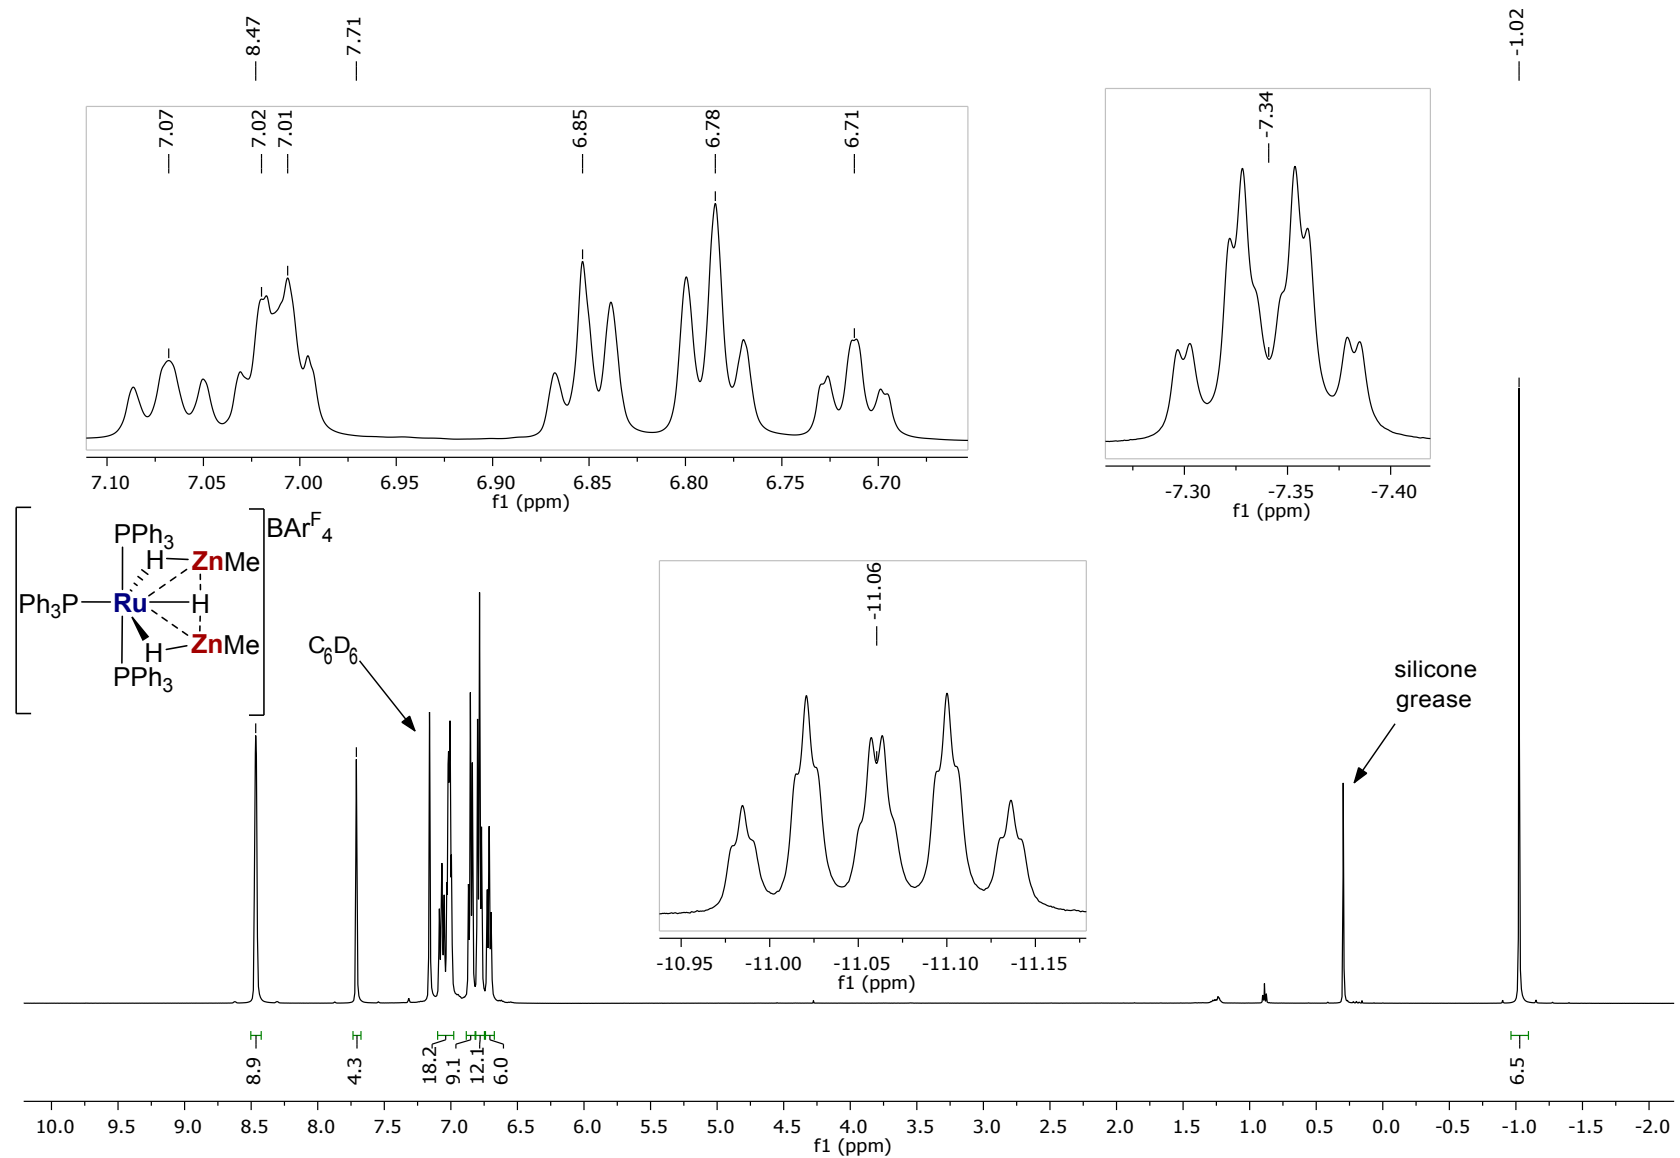

**Figure S33.**  $^1\text{H}$  NMR spectrum (500 MHz,  $\text{C}_6\text{D}_6$ , 298 K) of  $[\text{Ru}(\text{PPh}_3)_3(\text{ZnMe})_2\text{H}_3][\text{BARF}_4]$  (12).

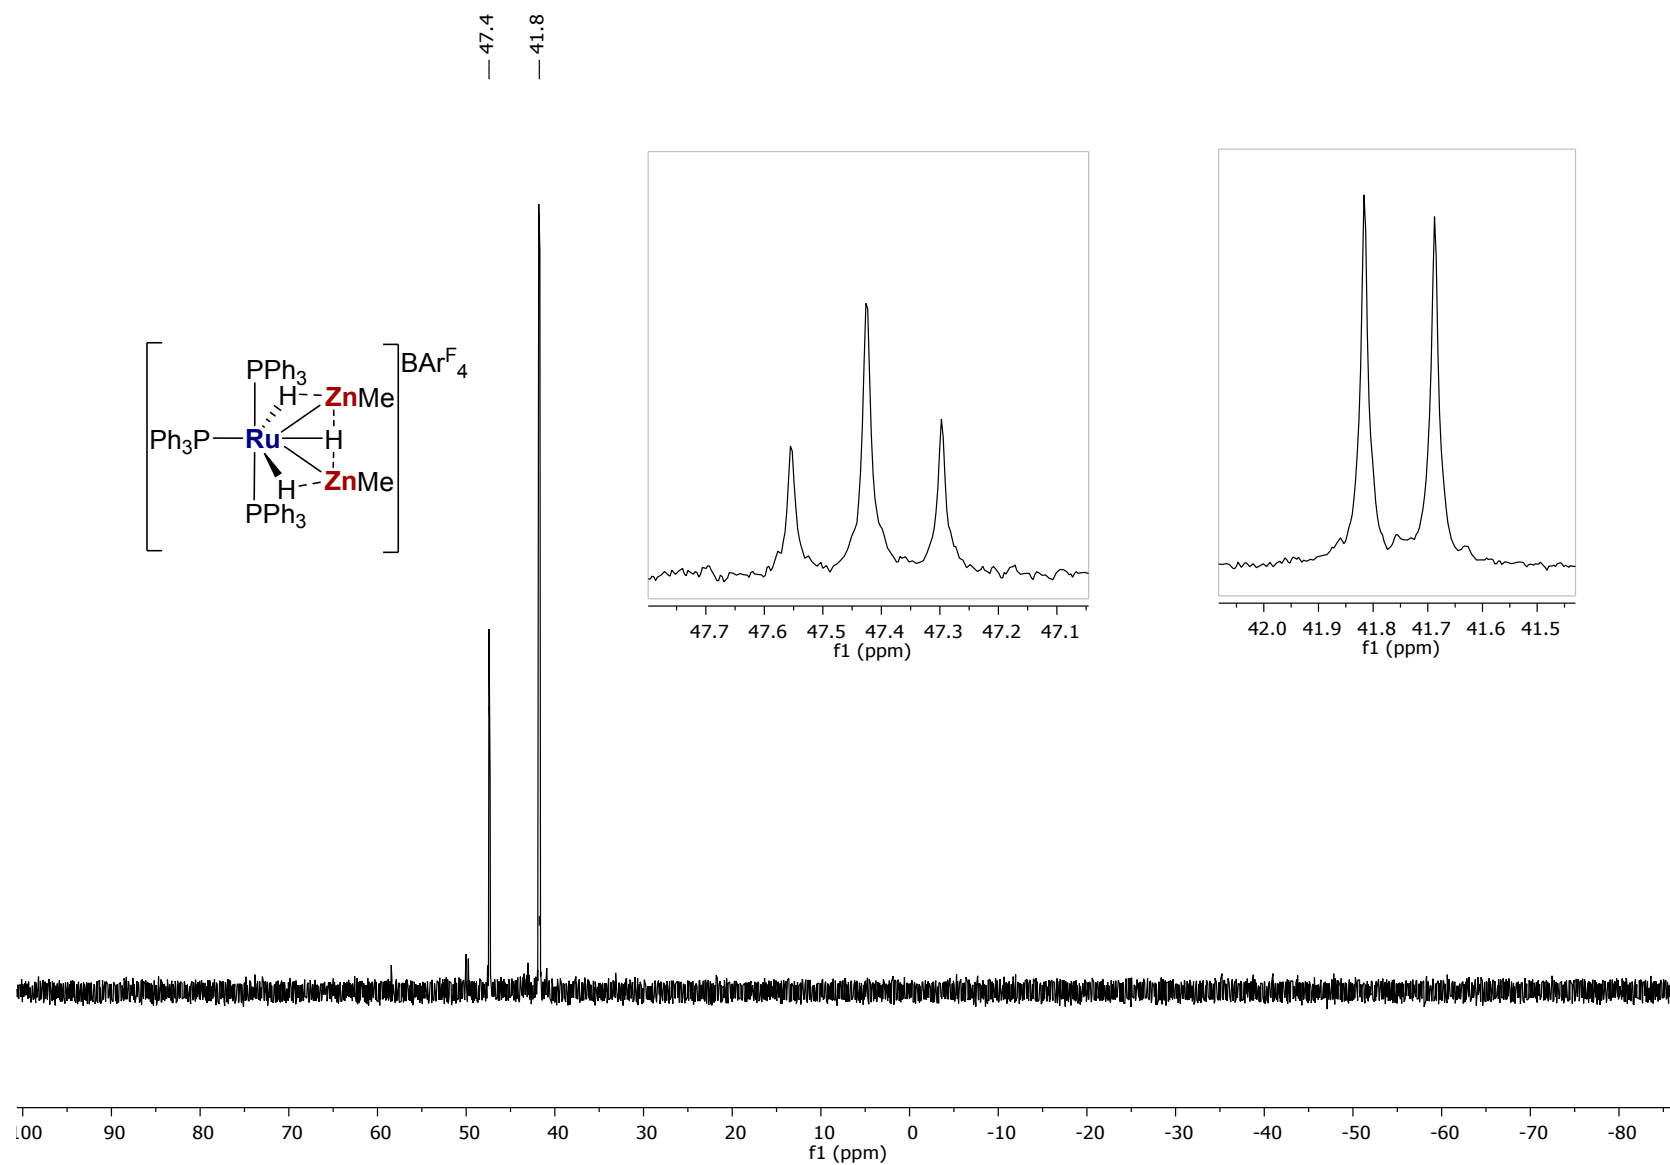

**Figure S34.**  $^{31}\text{P}\{^1\text{H}\}$  NMR spectrum (202 MHz,  $\text{C}_6\text{D}_6$ , 298 K) of  $[\text{Ru}(\text{PPh}_3)_3(\text{ZnMe})_2\text{H}_3][\text{BARF}_4]$  (**12**).

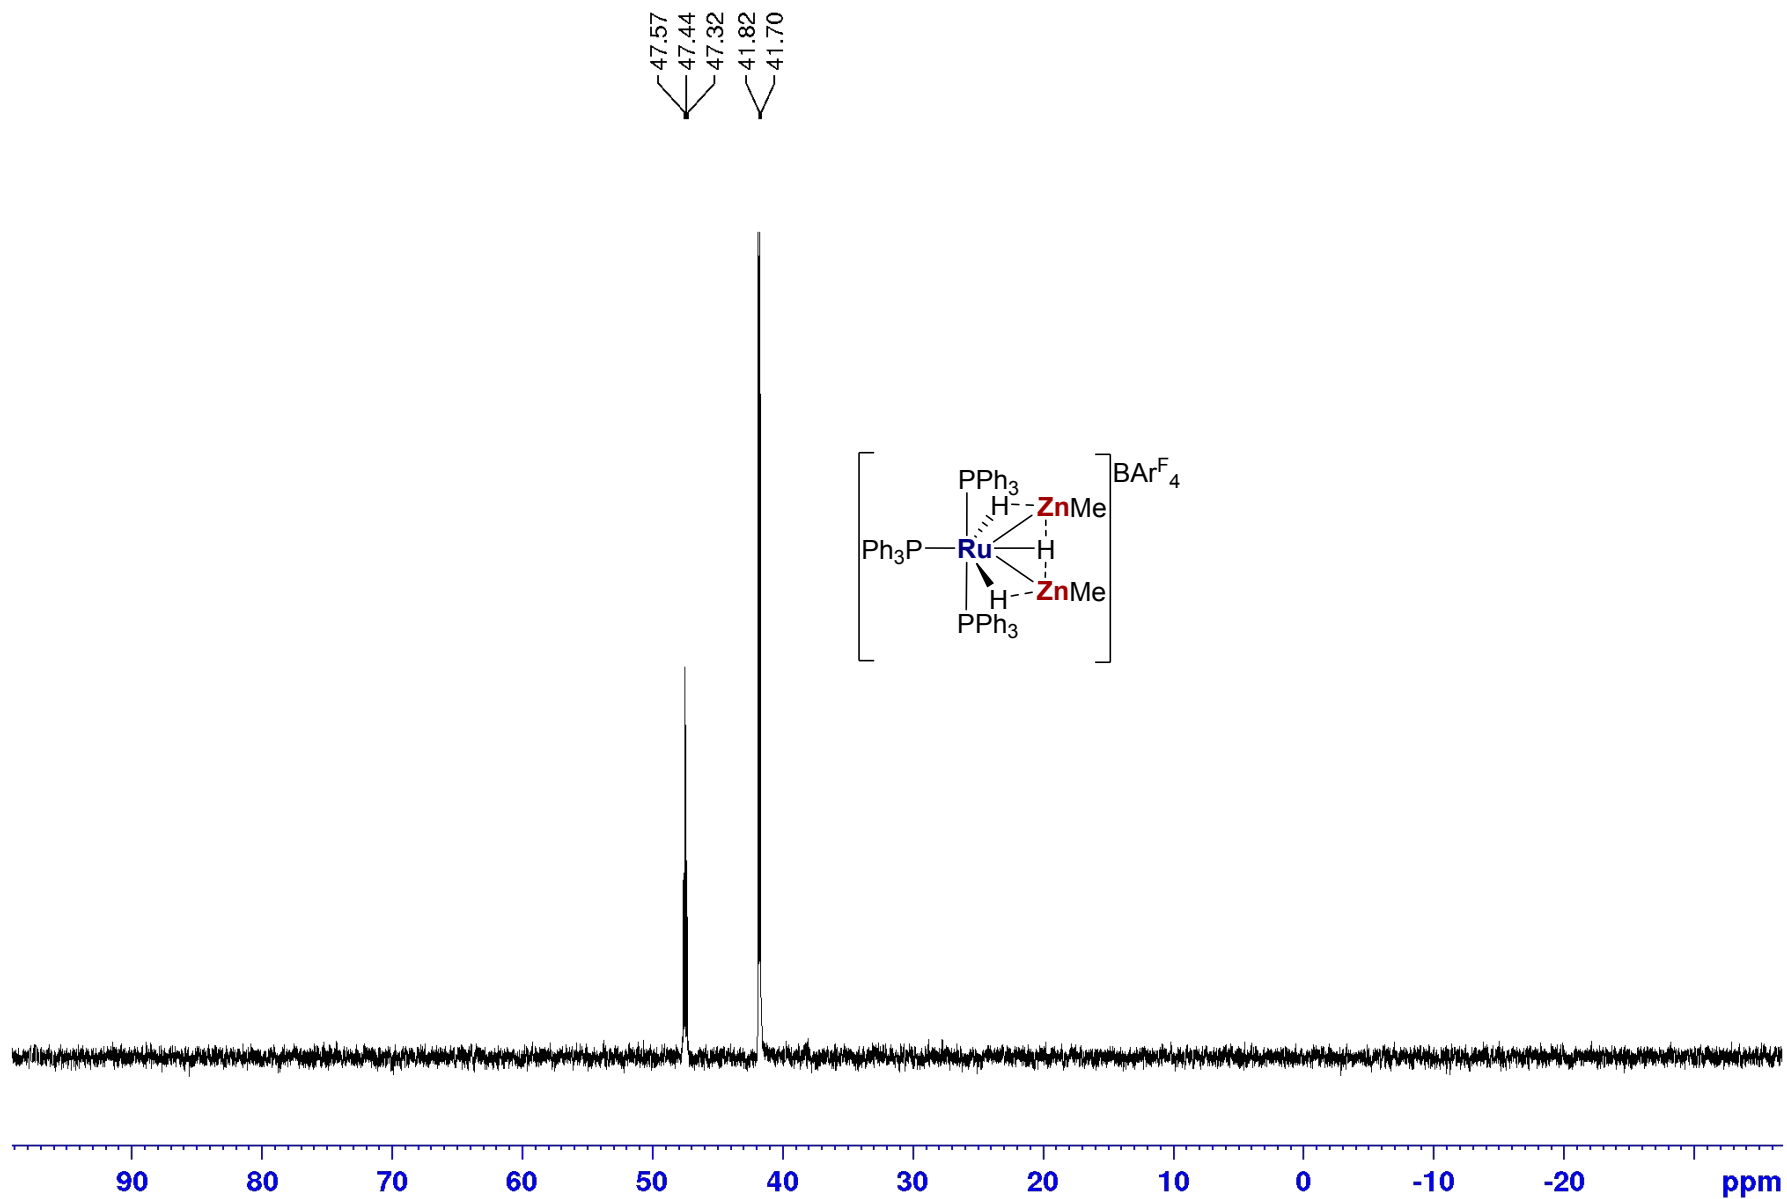

**Figure S35.**  $^{31}\text{P}\{^1\text{H}\}$  NMR spectrum (202 MHz,  $\text{C}_6\text{D}_6$ , 298 K) showing the clean formation of  $[\text{Ru}(\text{PPh}_3)_3(\text{ZnMe})_2\text{H}_3][\text{BARF}_4]$  (**12**) from stirring a powdered sample of solid **2** under 1 atm  $\text{H}_2$  for 2 h.

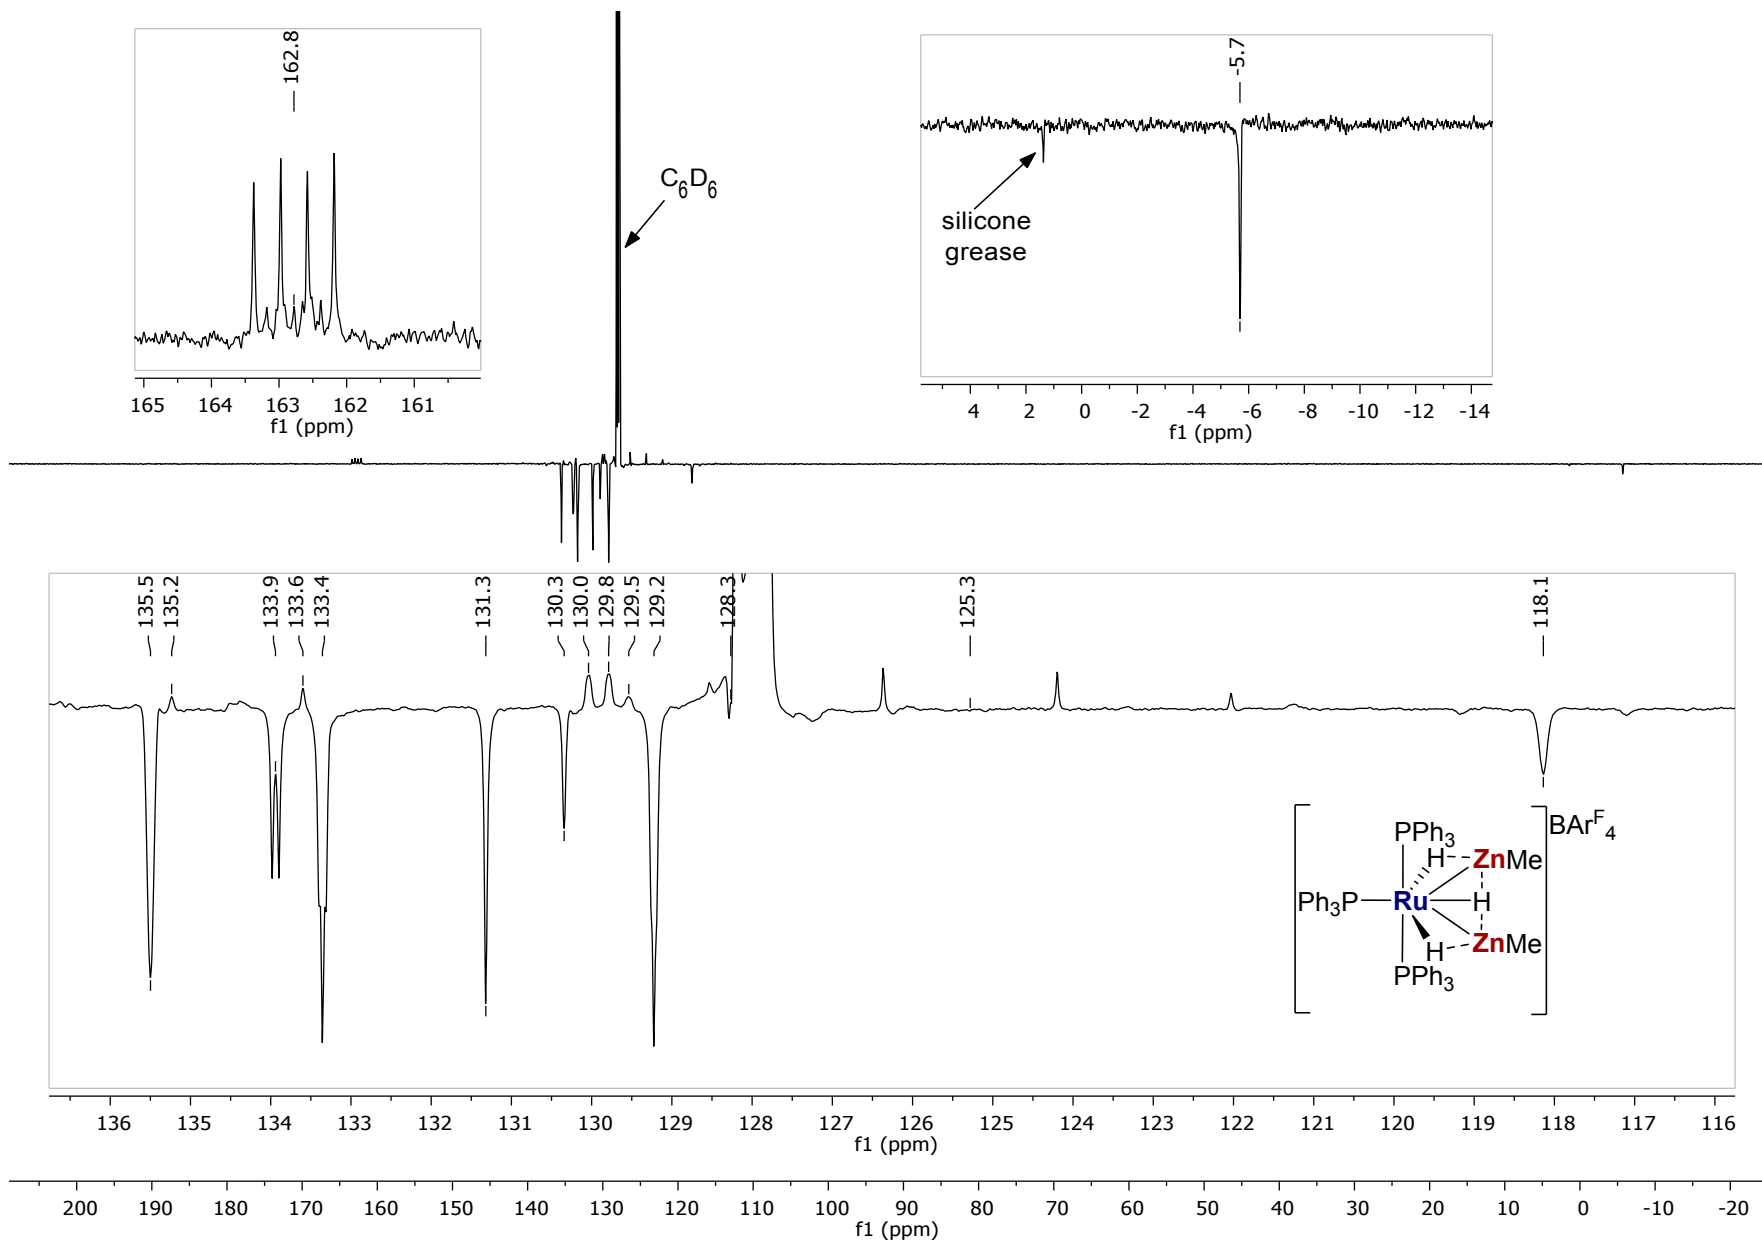

**Figure S36.**  $^{13}\text{C}\{^1\text{H}\}$  (PENDANT) NMR spectrum (126 MHz,  $\text{C}_6\text{D}_6$ , 298 K) of  $[\text{Ru}(\text{PPh}_3)_3(\text{ZnMe})_2\text{H}_3][\text{BARF}_4]$  (**12**).

**Table S1.** Crystal data and structural refinement details for **6**, **7** and **12**.

| Compound                                                            | <b>6</b>                                                           | <b>7</b>                                                            | <b>12</b>                                                                         |
|---------------------------------------------------------------------|--------------------------------------------------------------------|---------------------------------------------------------------------|-----------------------------------------------------------------------------------|
| Empirical formula                                                   | C <sub>50</sub> H <sub>61</sub> P <sub>3</sub> RuZn <sub>2</sub>   | C <sub>87</sub> H <sub>79</sub> N <sub>2</sub> P <sub>3</sub> RuZn  | C <sub>88</sub> H <sub>63</sub> BF <sub>24</sub> P <sub>3</sub> RuZn <sub>2</sub> |
| Formula weight                                                      | 986.70                                                             | 1411.87                                                             | 1911.91                                                                           |
| Crystal system                                                      | monoclinic                                                         | triclinic                                                           | triclinic                                                                         |
| Space group                                                         | <i>P</i> 2 <sub>1</sub> / <i>n</i>                                 | <i>P</i> -1                                                         | <i>P</i> -1                                                                       |
| <i>a</i> /Å                                                         | 10.3380(1)                                                         | 14.2690(4)                                                          | 15.0492(2)                                                                        |
| <i>b</i> /Å                                                         | 18.2601(1)                                                         | 14.4805(4)                                                          | 16.8374(3)                                                                        |
| <i>c</i> /Å                                                         | 24.6354(2)                                                         | 19.9802(5)                                                          | 18.9130(3)                                                                        |
| $\alpha$ /°                                                         | 90                                                                 | 71.357(3)                                                           | 63.974(2)                                                                         |
| $\beta$ /°                                                          | 97.144(1)                                                          | 75.043(2)                                                           | 69.958(2)                                                                         |
| $\gamma$ /°                                                         | 90                                                                 | 64.621(3)                                                           | 88.022(1)                                                                         |
| Volume/Å <sup>3</sup>                                               | 4614.39(6)                                                         | 3498.70(19)                                                         | 4007.32(13)                                                                       |
| <i>Z</i>                                                            | 4                                                                  | 2                                                                   | 2                                                                                 |
| $\rho_{\text{calc}}$ g cm <sup>-3</sup>                             | 1.420                                                              | 1.340                                                               | 1.585                                                                             |
| $\mu$ /mm <sup>-1</sup>                                             | 5.050                                                              | 3.181                                                               | 3.677                                                                             |
| <i>F</i> (000)                                                      | 2040.0                                                             | 1468.0                                                              | 1922.0                                                                            |
| Crystal size/mm <sup>3</sup>                                        | 0.125 × 0.110 × 0.089                                              | 0.173 × 0.102 × 0.094                                               | 0.37 × 0.199 × 0.035                                                              |
| 2 $\theta$ range for data collection/°                              | 6.042 to 146.108                                                   | 6.926 to 146.396                                                    | 5.584 to 146.01                                                                   |
| Index ranges                                                        | -12 ≤ <i>h</i> ≤ 9,<br>-22 ≤ <i>k</i> ≤ 22,<br>-30 ≤ <i>l</i> ≤ 30 | -16 ≤ <i>h</i> ≤ 17,<br>-13 ≤ <i>k</i> ≤ 17,<br>-23 ≤ <i>l</i> ≤ 24 | -18 ≤ <i>h</i> ≤ 17,<br>-20 ≤ <i>k</i> ≤ 20,<br>-23 ≤ <i>l</i> ≤ 18               |
| Reflections collected, <i>R</i> <sub>int</sub>                      | 62536                                                              | 45723                                                               | 57572                                                                             |
| Independent reflections                                             | 9194, 0.0771                                                       | 13926, 0.0370                                                       | 15938, 0.0390                                                                     |
| Data/restraints/parameters                                          | 9194/30/600                                                        | 13926/0/857                                                         | 15938/156/1167                                                                    |
| Goodness-of-fit on <i>F</i> <sup>2</sup>                            | 1.041                                                              | 1.031                                                               | 1.036                                                                             |
| Final <i>R</i> 1, <i>wR</i> 2 [ <i>I</i> ≥ 2 $\sigma$ ( <i>I</i> )] | 0.0347, 0.0897                                                     | 0.0283, 0.0684                                                      | 0.0326, 0.0856                                                                    |
| Final <i>R</i> 1, <i>wR</i> 2 [all data]                            | 0.0385, 0.0933                                                     | 0.0316, 0.0707                                                      | 0.0346, 0.0879                                                                    |
| Largest diff. peak/hole / e Å <sup>-3</sup>                         | 0.74/-0.78                                                         | 0.45/-0.84                                                          | 0.66/-0.96                                                                        |

**Table S2.** Selected bond lengths (Å) and angles (°) in **6**, **7** and **12**.

|                      | <b>6</b>                          | <b>7</b>                                    | <b>12</b>                                 |
|----------------------|-----------------------------------|---------------------------------------------|-------------------------------------------|
| Ru-Zn                | 2.4835(4), 2.5109(4)              | 2.6541(3)                                   | 2.5188(3), 2.5387(3)                      |
| Ru-PR <sub>3</sub>   | 2.3411(5)                         | 2.3190(4)                                   | 2.3784(5), 2.4090(5),<br>2.3770(5)        |
| Ru-PPh <sub>2</sub>  | 2.3451(5), 2.3743(6)              | 2.3763(4), 2.3798(4)                        | -                                         |
| Ru-C <sub>aryl</sub> | 2.155(2), 2.110(2)                | 2.0970(17), 2.143(16)                       | -                                         |
| Zn...Zn              | 2.5837(5)                         | -                                           | -                                         |
| Zn-Ru-Zn             | 62.301(11)                        | -                                           | 106.229(10)                               |
| P-Ru-P               | 162.64(2), 98.82(2),<br>96.68(2), | 103.677(15),<br>101.106(15),<br>102.660(15) | 164.804(17),<br>99.051(16),<br>95.598(16) |



## S-2 Computational Studies

**Computational Details.** DFT calculations were run with Gaussian 16 (Revision C.01).<sup>4</sup> Ru, Zn and P centers were described with the Stuttgart RECPs and associated basis sets<sup>5</sup> and 6-31G\*\* basis sets were used for all other atoms.<sup>6,7</sup> A set of d-orbital polarization functions was also added to P ( $\zeta^d=0.387$ ).<sup>8</sup> Electronic structure analyses were performed on structures using the heavy atom positions derived from the crystallographic studies with H atom positions optimized with the BP86 functional.<sup>9,10</sup> Details of functional testing on the fully optimised structure of **2** are provided in the Supporting Information. Quantum theory of atoms in molecules (QTAIM)<sup>11</sup> used the AIMALL program.<sup>12</sup> NCI calculations were based on the promolecular densities and used NCIPLOT<sup>13</sup> with visualization via VMD.<sup>14</sup> Natural orbitals for chemical valence (NOCV) analyses<sup>15</sup> were run using the Amsterdam Modeling Suite (AMS) package.<sup>16</sup> Computed geometries are displayed with ChemCraft<sup>17</sup> all geometries are supplied as a separate XYZ file.

### S-2.1 Functional Testing on the Geometry of **2**.

The structure of **2** was fully optimized using a range of functionals, including GGA functionals (PBE,<sup>18</sup> BP86,<sup>9,10</sup> BLYP,<sup>19</sup> B97D,<sup>20</sup> TPSS<sup>21</sup>), hybrid GGA functionals (PBE0,<sup>22</sup> B3LYP,<sup>23</sup>  $\omega$ B97XD<sup>24</sup>) and a Minnesota functional (M06<sup>25</sup>). The resulting minima were characterized via analytical frequency calculations (all positive eigenvalues). Key selected distances are compared with experiment in Table S3. In general, good agreement is seen for the Ru–Zn, Ru–C and Zn $\oplus$ Zn distances. However, the Zn1 $\oplus$ C1 distance is over-estimated by between 0.06 and 0.20 Å while the over-estimation of the Ru-P distances is typical for late TM–P bonds. RMS displacement values on the heavy atom positions suggest a similar performance across all functionals with the B97D, B97D3 and w-B97xD functionals performing less well than the others by this measure.

Given these discrepancies the electronic structure studies were performed using the experimental heavy atom positions from the X-ray structures with only the H atoms positions being optimized.

**Table S3.** Results of the functional screening conducted on **2**. Key interatomic distances in Å.

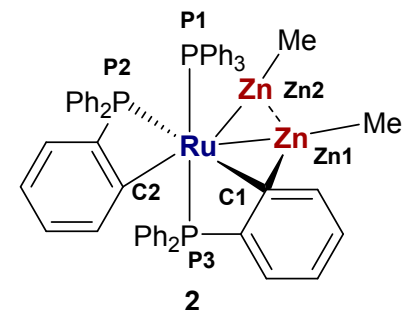

| Distance/Å                            | X-Ray     | BP86 | BLYP | B3LYP | PBE  | PBE0 | B97D | B97D3 | M06  | TPSS | $\omega$ B97XD |
|---------------------------------------|-----------|------|------|-------|------|------|------|-------|------|------|----------------|
| <b>Ru–Zn1</b>                         | 2.5103(4) | 2.53 | 2.58 | 2.56  | 2.53 | 2.51 | 2.56 | 2.54  | 2.53 | 2.52 | 2.51           |
| <b>Ru–Zn2</b>                         | 2.5012(4) | 2.52 | 2.57 | 2.54  | 2.52 | 2.51 | 2.54 | 2.52  | 2.52 | 2.51 | 2.50           |
| <b>Zn1⊗Zn2</b>                        | 2.5898(5) | 2.61 | 2.61 | 2.61  | 2.62 | 2.63 | 2.64 | 2.61  | 2.61 | 2.60 | 2.61           |
| <b>Zn1⊗C1</b>                         | 2.353(2)  | 2.46 | 2.53 | 2.48  | 2.45 | 2.41 | 2.48 | 2.55  | 2.45 | 2.42 | 2.45           |
| <b>Ru–C1</b>                          | 2.173(2)  | 2.15 | 2.17 | 2.16  | 2.15 | 2.14 | 2.15 | 2.14  | 2.15 | 2.15 | 2.16           |
| <b>Ru–C2</b>                          | 2.127(3)  | 2.14 | 2.16 | 2.14  | 2.13 | 2.12 | 2.12 | 2.13  | 2.13 | 2.14 | 2.12           |
| <b>Ru–P1</b>                          | 2.3496(7) | 2.42 | 2.47 | 2.44  | 2.41 | 2.39 | 2.39 | 2.38  | 2.40 | 2.41 | 2.38           |
| <b>Ru–P2</b>                          | 2.3805(7) | 2.45 | 2.53 | 2.49  | 2.44 | 2.42 | 2.42 | 2.42  | 2.44 | 2.45 | 2.40           |
| <b>Ru–P3</b>                          | 2.3457(7) | 2.40 | 2.46 | 2.44  | 2.39 | 2.38 | 2.35 | 2.35  | 2.40 | 2.39 | 2.39           |
| <b>RMS Displacement/Å<sup>a</sup></b> | -         | 0.40 | 0.40 | 0.39  | 0.39 | 0.38 | 0.51 | 0.48  | 0.36 | 0.38 | 0.45           |

<sup>a</sup> heavy atom positions only.

## S2-2 Electronic Structure Analyses

**Complex 7.** Electronic structure analyses of **7** focussing on key interactions around the Ru–Zn vector are shown in Figure S37.

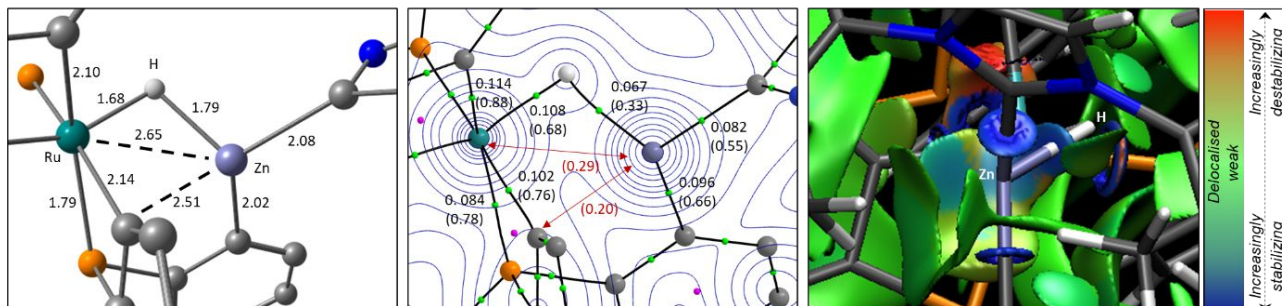

**Figure S37.** Electronic Structure Analyses of **7**. Left: computed structure with selected distances in Å. Center: QTAIM molecular graphs with bond critical bonds (BCPs) in green and ring critical points (RCPs) in pink are included. Electron density,  $\rho(r)$ , contour plots are shown along with selected BCP (au) and delocalisation indices in parenthesis; delocalization indices between atoms not linked by a bond path are indicated in red. Right: NCI plots are displayed centered on the Zn–Ru vector. Isosurfaces are generated for  $\sigma = 0.3$  au and  $-0.07 < \rho < 0.07$  au; a key showing the color scheme employed is also provided.

**Complexes 13<sup>+</sup>, 14<sup>+</sup> and 15<sup>+</sup>.** We have previously published aspects of the electronic structure of [Ru(IPr)<sub>2</sub>(CO)(ZnEt)]<sup>+</sup>, [Ru(IPr)<sub>2</sub>(CO)(ZnEt)H<sub>2</sub>]<sup>+</sup> and [Ru(IPr)<sub>2</sub>(CO)(ZnEt)(η<sup>2</sup>-H<sub>2</sub>)H<sub>2</sub>]<sup>+</sup>,<sup>26</sup> and here we provide complete analyses of the Me analogues of these species for direct comparison with ZnMe-containing **2** and **3**. (see Figure S38 and Figures S43-S45).

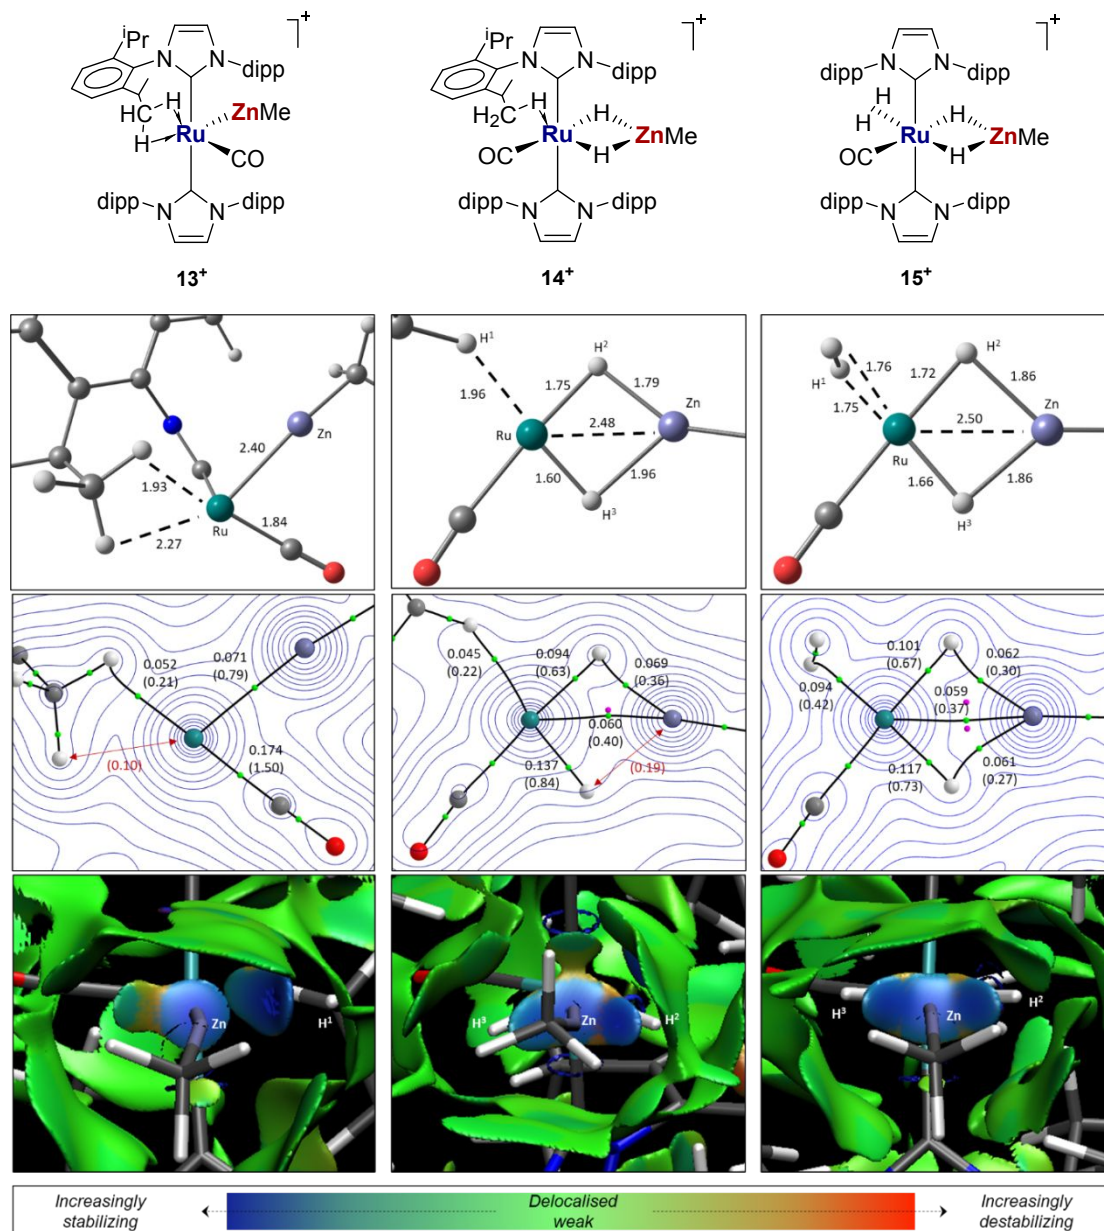

**Figure S38.** Electronic Structure Analyses of **13<sup>+</sup>**, **14<sup>+</sup>** and **15<sup>+</sup>**. Top: computed structure with selected distances in Å. Center: QTAIM molecular graphs with bond critical bonds (BCPs) in green and ring critical points (RCPs) in pink are included. Electron density,  $\rho(r)$ , contour plots are shown along with selected BCP (au) and delocalisation indices in parenthesis; delocalization indices between atoms not linked by a bond path are indicated in red. Bottom: NCI plots are displayed centered on the Zn-Ru vector. Isosurfaces are generated for  $\sigma = 0.3$  au and  $-0.07 < \rho < 0.07$  au; a key showing the color scheme employed is also provided.

## Computed QTAIM Metrics

Relevant bond critical point data associated with the computed complexes are provided in atomic units. Selected parameters are defined as:  $\rho(r)$  electron density,  $\nabla^2\rho(r)$  Laplacian of electron density,  $\varepsilon$  ellipticity,  $H(r)$  local energy density,  $\delta(A,B)$  delocalization index.

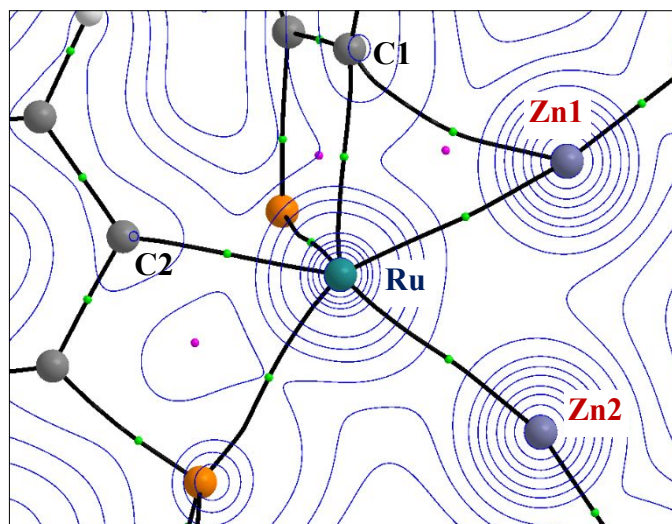

| Bond          | $\rho(r)$ | $\nabla^2\rho(r)$ | $\varepsilon$ | $H(r)$ | $\delta(A,B)$ |
|---------------|-----------|-------------------|---------------|--------|---------------|
| <b>Ru-Zn1</b> | 0.059     | 0.066             | 0.157         | -0.019 | 0.515         |
| <b>Ru-Zn2</b> | 0.061     | 0.062             | 0.048         | -0.020 | 0.675         |
| <b>Zn1-C1</b> | 0.049     | 0.086             | 2.703         | -0.010 | 0.256         |
| <b>Ru-C1</b>  | 0.098     | 0.170             | 0.083         | -0.032 | 0.759         |
| <b>Ru-C2</b>  | 0.109     | 0.185             | 0.126         | -0.040 | 0.804         |

**Figure S39.** Molecular graph and associated bond critical point data for complex 2.

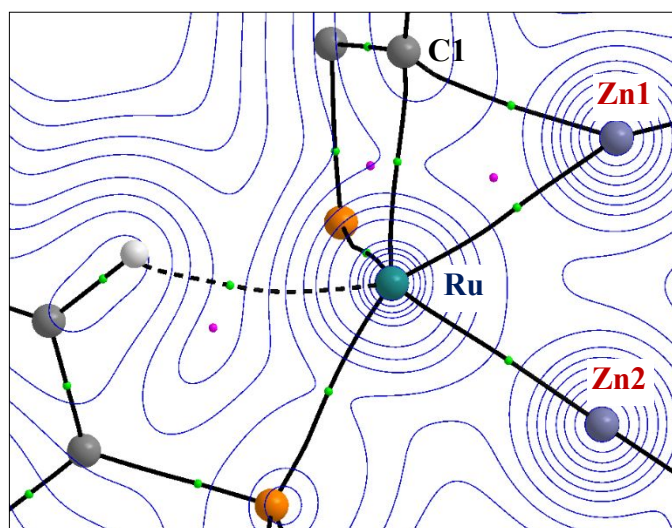

| Bond          | $\rho(r)$ | $\nabla^2\rho(r)$ | Ellipticity | H (r)  | $\delta(A,B)$ |
|---------------|-----------|-------------------|-------------|--------|---------------|
| <b>Ru–Zn1</b> | 0.054     | 0.066             | 0.563       | -0.017 | 0.461         |
| <b>Ru–Zn2</b> | 0.071     | 0.101             | 0.039       | -0.023 | 0.820         |
| <b>Ru–C1</b>  | 0.091     | 0.170             | 0.090       | -0.029 | 0.715         |
| <b>Zn1–C1</b> | 0.070     | 0.157             | 0.293       | -0.016 | 0.401         |

**Figure S40.** Molecular graph and associated bond critical point data for complex **3**.

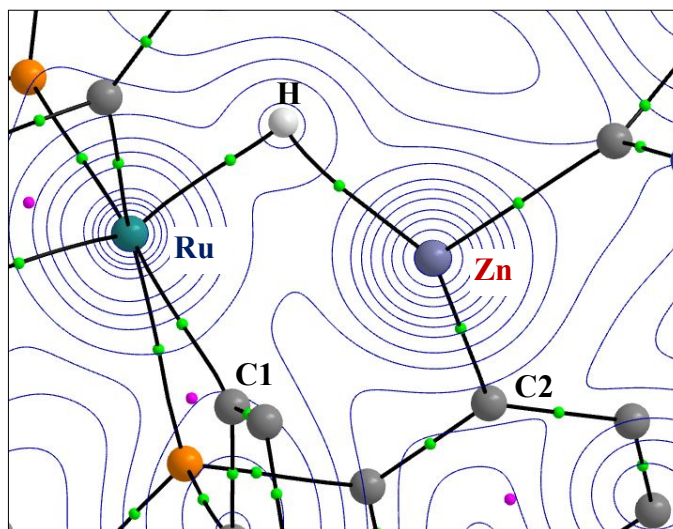

| Bond         | $\rho(r)$ | $\nabla^2\rho(r)$ | Ellipticity | H (r)  | $\delta(A,B)$ |
|--------------|-----------|-------------------|-------------|--------|---------------|
| <b>Ru-H</b>  | 0.108     | 0.183             | 0.084       | -0.042 | 0.680         |
| <b>Zn-H</b>  | 0.067     | 0.128             | 0.221       | -0.018 | 0.327         |
| <b>Ru-C1</b> | 0.102     | 0.195             | 0.113       | -0.035 | 0.759         |
| <b>Zn-C2</b> | 0.096     | 0.248             | 0.021       | -0.027 | 0.657         |

**Figure S41.** Molecular graph and associated bond critical point data for complex 7.



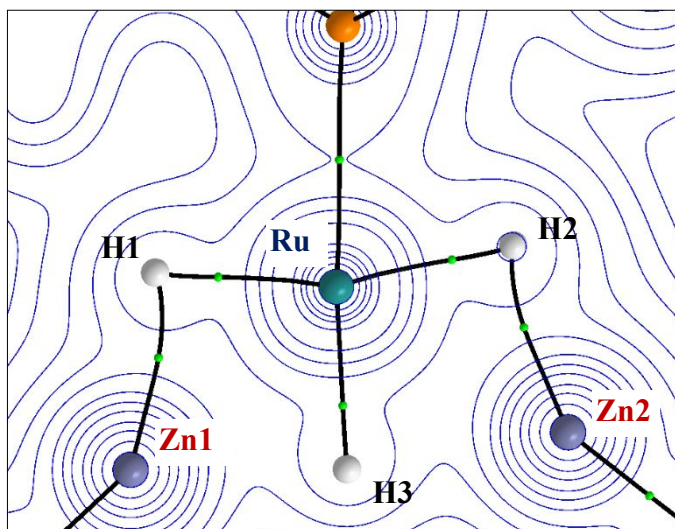

| Bond                    | $\rho(r)$ | $\nabla^2\rho(r)$ | Ellipticity | H (r)  | $\delta(A,B)$ |
|-------------------------|-----------|-------------------|-------------|--------|---------------|
| <b>Ru-H1</b>            | 0.106     | 0.184             | 0.022       | -0.041 | 0.692         |
| <b>Ru-H2</b>            | 0.106     | 0.191             | 0.033       | -0.041 | 0.678         |
| <b>Ru-H3</b>            | 0.107     | 0.199             | 0.145       | -0.042 | 0.698         |
| <b>H1-Zn1</b>           | 0.064     | 0.108             | 0.531       | -0.017 | 0.313         |
| <b>H2-Zn2</b>           | 0.068     | 0.117             | 0.439       | -0.018 | 0.320         |
| <b>H-Zn<sup>a</sup></b> | 0.113     | 0.189             | 0.000       | -0.040 | 0.890         |

**Figure S42.** Molecular graph and associated bond critical point data for complex 12.<sup>a</sup> H-Zn bond in ZnMeH.



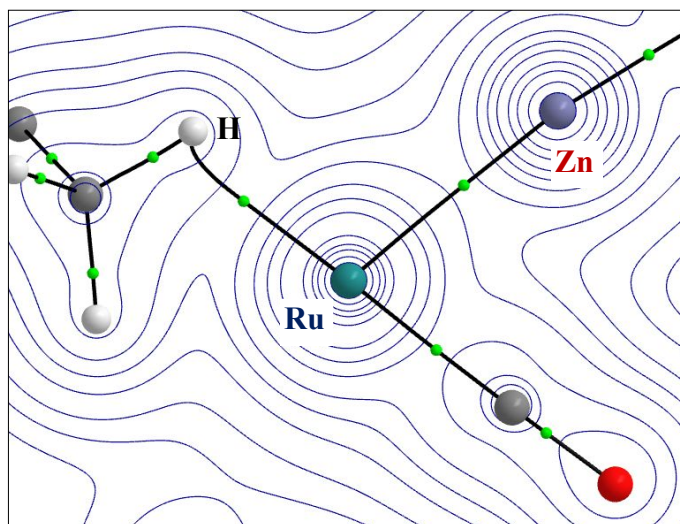

| Bond         | $\rho(r)$ | $\nabla^2\rho(r)$ | Ellipticity | H (r)  | $\delta(A,B)$ |
|--------------|-----------|-------------------|-------------|--------|---------------|
| <b>Ru-H</b>  | 0.052     | +0.238            | 0.823       | -0.004 | 0.214         |
| <b>Ru-Zn</b> | 0.071     | +0.110            | 0.005       | +0.023 | 0.792         |

**Figure S43.** Molecular graph and associated bond critical point data for complex 13<sup>+</sup>.

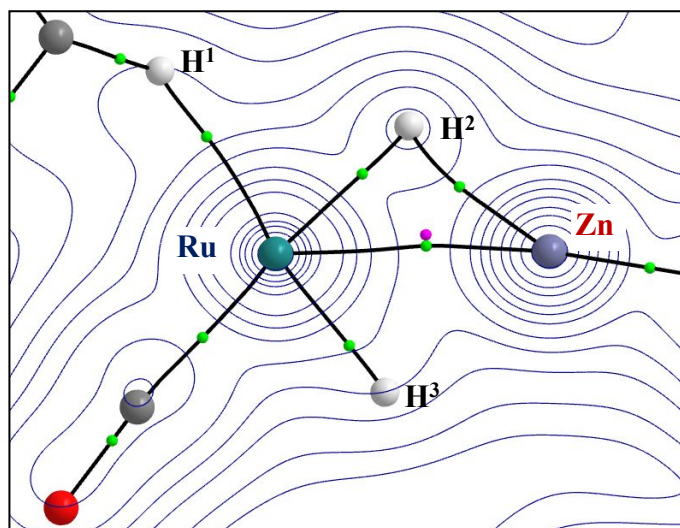

| Bond                    | $\rho(r)$ | $\nabla^2\rho(r)$ | Ellipticity | H (r)  | $\delta(A,B)$ |
|-------------------------|-----------|-------------------|-------------|--------|---------------|
| <b>Ru-H<sup>1</sup></b> | 0.045     | 0.156             | 0.207       | -0.007 | 0.220         |
| <b>Ru-H<sup>2</sup></b> | 0.094     | 0.192             | 0.153       | -0.033 | 0.631         |
| <b>Ru-H<sup>3</sup></b> | 0.137     | 0.138             | 0.018       | -0.067 | 0.848         |
| <b>H<sup>2</sup>-Zn</b> | 0.069     | 0.122             | 0.397       | -0.019 | 0.355         |
| <b>Ru-Zn</b>            | 0.060     | 0.098             | 3.710       | -0.018 | 0.398         |

**Figure S44.** Molecular graph and associated bond critical point data for complex **14<sup>+</sup>**.

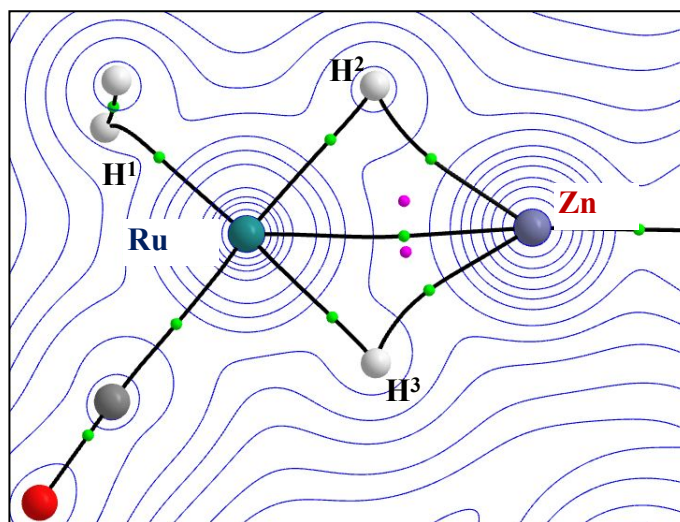

| Bond                    | $\rho(r)$ | $\nabla^2\rho(r)$ | Ellipticity | H (r)  | $\delta(A,B)$ |
|-------------------------|-----------|-------------------|-------------|--------|---------------|
| <b>Ru-H<sup>1</sup></b> | 0.094     | 0.361             | 5.704       | -0.026 | 0.420         |
| <b>Ru-H<sup>2</sup></b> | 0.101     | 0.184             | 0.110       | -0.038 | 0.669         |
| <b>Ru-H<sup>3</sup></b> | 0.117     | 0.179             | 0.066       | -0.050 | 0.733         |
| <b>H<sup>2</sup>-Zn</b> | 0.062     | 0.105             | 0.668       | -0.016 | 0.302         |
| <b>H<sup>3</sup>-Zn</b> | 0.061     | 0.108             | 0.996       | -0.015 | 0.268         |
| <b>Ru-Zn</b>            | 0.059     | 0.092             | 4.812       | -0.017 | 0.369         |

**Figure S45.** Molecular graph and associated bond critical point data for complex **15<sup>+</sup>**.

### ETS-NOCV analyses.

The ETS-NOCV method was employed to assess the interaction between the different  $\{\text{ZnMe}\}^+$  fragments and the remaining Ru-based fragments within complexes **2**, **3** and **12**. The results of energy decomposition analysis for each fragmentation pattern are displayed in Table S4. The major deformation density channel of each structure is shown in Figures S46-48, along with its interaction energy,  $\Delta E_{\text{Orb}}$  and charge transfer,  $\Delta q$ . All the figures used the same isovalue (0.0025) for the contour plots so that they could be compared to one another. Electron flow is shown from red to blue (most H atoms and some phenyl rings were omitted for clarity).

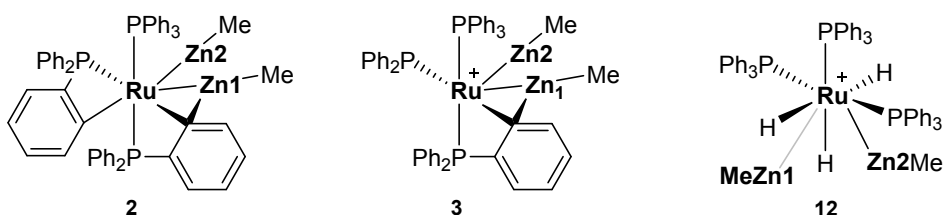

|                           | <b>2</b>             |                      | <b>3</b>             |                      | <b>12</b>            |                      |
|---------------------------|----------------------|----------------------|----------------------|----------------------|----------------------|----------------------|
|                           | $\{\text{Zn1Me}\}^+$ | $\{\text{Zn2Me}\}^+$ | $\{\text{Zn1Me}\}^+$ | $\{\text{Zn2Me}\}^+$ | $\{\text{Zn1Me}\}^+$ | $\{\text{Zn2Me}\}^+$ |
| $\Delta E_{\text{Pauli}}$ | 146.3                | 150.9                | 142.8                | 127.00               | 125.0                | 122.3                |
| $\Delta V_{\text{elec}}$  | -197.9               | -200.6               | -127.6               | -116.9               | -121.2               | -122.6               |
| $\Delta E_{\text{oi}}$    | -131.2               | -141.0               | -120.2               | -122.8               | -111.6               | -109.7               |
| $\Delta E_{\text{tot}}$   | -182.8               | -190.8               | -104.9               | -112.7               | -107.9               | -110.1               |

**Table S4.** Energy decomposition analysis of the two different fragmentation patterns of **2**, **3** and **13**. Energies in kcal/mol correspond to the Pauli repulsion,  $\Delta E_{\text{Pauli}}$ , electrostatic interaction,  $\Delta V_{\text{elec}}$ , orbital interaction,  $\Delta E_{\text{oi}}$ , and total bonding energy,  $\Delta E_{\text{tot}}$ .

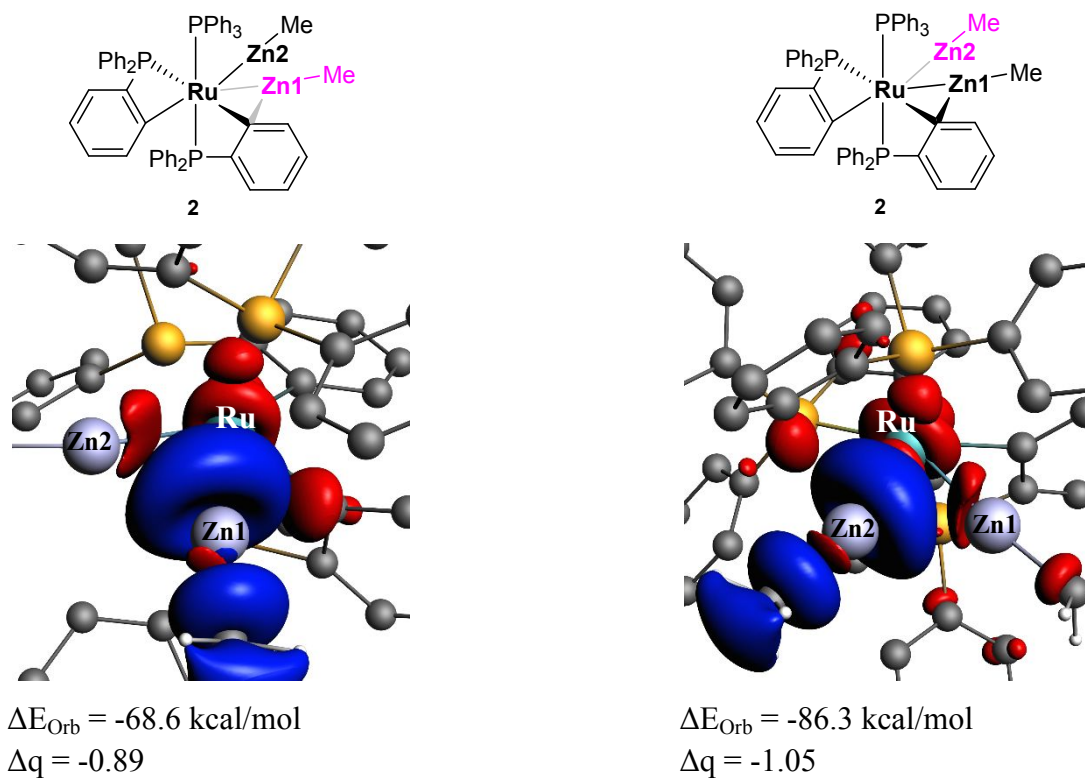

**Figure S46.** Main ETS-NOCV deformation density channel plot of **2** and associative metrics.

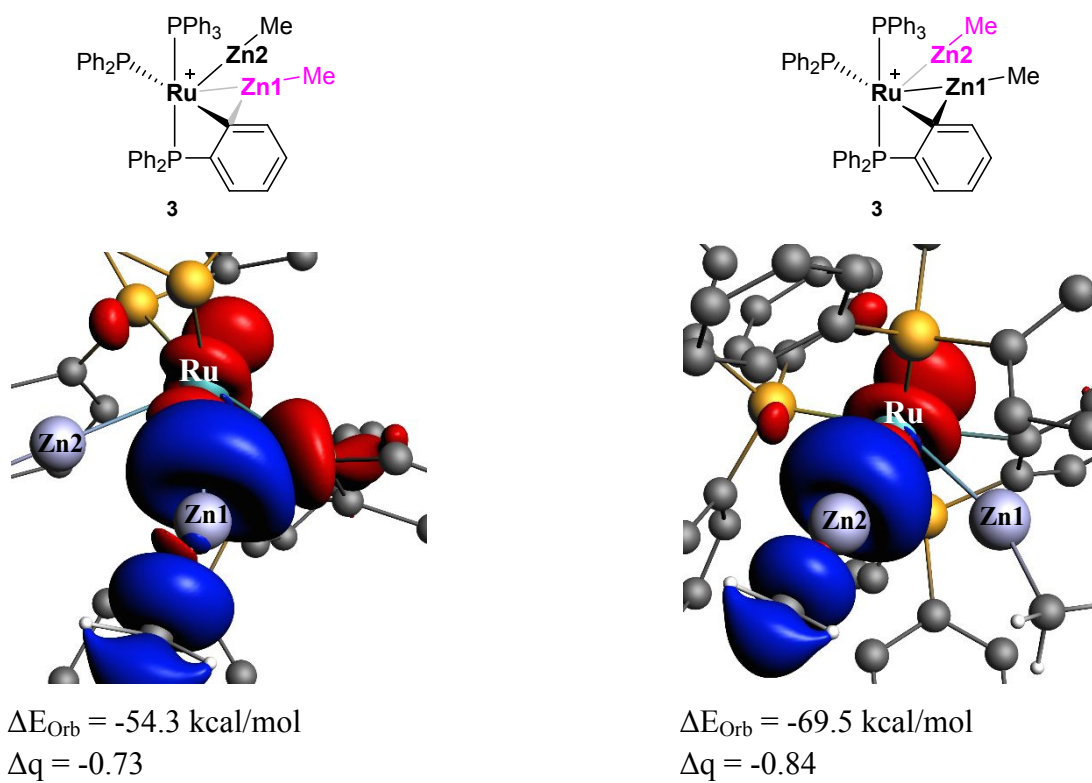

**Figure S47.** Main ETS-NOCV deformation density channel plot of **3** and associative metrics.

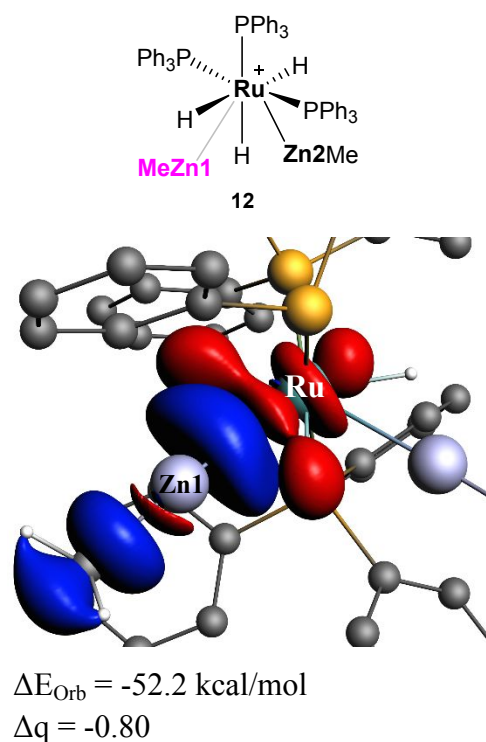

**Figure S48.** Main ETS-NOCV deformation density channel plot of **12** and associative metrics. Results with the  $\{\text{Zn2Me}\}^+$  fragment were almost identical and are not shown.

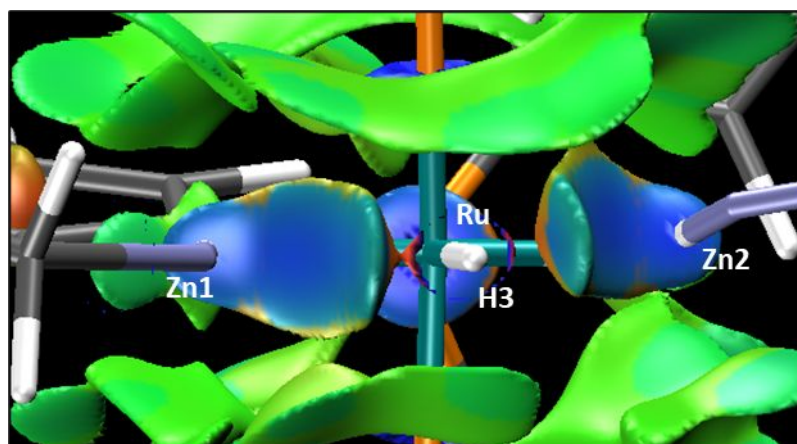

**Figure S49.** NCI plot of species **12** viewed down the Zn1-H1 vector. Isosurfaces are generated for  $\sigma = 0.3 \text{ au}$  and  $-0.07 < \rho < 0.07 \text{ au}$ ; a key showing the color scheme employed is also provided.

**S-3 Computed Structures (A) and Energies (atomic units).**

**2 (H atoms optimized)**

BP86 energy = -2732.69433041

|    |          |          |          |
|----|----------|----------|----------|
| Ru | 0.07022  | -0.38304 | 0.17535  |
| Zn | 0.06566  | -0.42625 | -2.32542 |
| Zn | 0.20524  | -2.61979 | -0.95586 |
| P  | 2.36721  | -0.81782 | 0.41097  |
| P  | 0.28279  | 1.97995  | -0.01925 |
| P  | -2.27374 | -0.46803 | 0.14666  |
| C  | 0.22224  | 0.10405  | -4.23403 |
| H  | -0.08357 | 1.15313  | -4.40234 |
| H  | -0.43396 | -0.53441 | -4.85370 |
| H  | 1.25282  | -0.01433 | -4.61585 |
| C  | 0.51193  | -4.47119 | -1.52522 |
| H  | 1.59226  | -4.63254 | -1.68519 |
| H  | -0.00868 | -4.70057 | -2.47194 |
| H  | 0.16612  | -5.18081 | -0.75429 |
| C  | 0.47526  | -2.17301 | 1.33786  |
| C  | -0.22081 | -3.13939 | 2.06752  |
| H  | -1.30112 | -3.25971 | 1.94936  |
| C  | 0.44334  | -3.97125 | 2.97675  |
| H  | -0.13207 | -4.72134 | 3.53282  |
| C  | 1.81007  | -3.85457 | 3.19632  |
| H  | 2.30769  | -4.50265 | 3.92667  |
| C  | 2.54159  | -2.91406 | 2.48645  |
| H  | 3.61783  | -2.79548 | 2.66207  |
| C  | 1.87572  | -2.12108 | 1.55545  |
| C  | 3.35108  | -1.65664 | -0.90236 |
| C  | 4.06224  | -2.81063 | -0.62083 |
| H  | 4.07815  | -3.22081 | 0.39270  |
| C  | 4.73403  | -3.47914 | -1.63922 |
| H  | 5.28076  | -4.39969 | -1.40478 |
| C  | 4.69300  | -3.00904 | -2.93109 |
| H  | 5.20843  | -3.55316 | -3.73058 |
| C  | 4.01141  | -1.85516 | -3.20839 |
| H  | 3.97399  | -1.46226 | -4.23061 |
| C  | 3.34068  | -1.18039 | -2.19536 |
| H  | 2.78213  | -0.27030 | -2.44070 |
| C  | 3.57893  | 0.30213  | 1.19340  |
| C  | 3.63457  | 0.42849  | 2.58604  |
| H  | 3.01325  | -0.20990 | 3.21776  |
| C  | 4.46056  | 1.38315  | 3.15954  |
| H  | 4.49176  | 1.48027  | 4.25055  |
| C  | 5.23344  | 2.20382  | 2.36677  |
| H  | 5.88153  | 2.95876  | 2.82679  |
| C  | 5.19847  | 2.07189  | 0.99365  |
| H  | 5.81785  | 2.71721  | 0.36141  |
| C  | 4.37841  | 1.12199  | 0.39858  |
| H  | 4.35557  | 1.03205  | -0.69202 |
| C  | 0.30753  | 0.61815  | 2.03660  |
| C  | 0.39848  | 0.21999  | 3.37640  |
| H  | 0.27102  | -0.83619 | 3.64746  |
| C  | 0.64252  | 1.15008  | 4.38146  |
| H  | 0.70272  | 0.81592  | 5.42548  |
| C  | 0.82109  | 2.50177  | 4.08460  |
| H  | 1.01097  | 3.22383  | 4.88650  |
| C  | 0.73558  | 2.92834  | 2.76688  |
| H  | 0.83580  | 3.99494  | 2.53127  |
| C  | 0.49228  | 1.98361  | 1.77108  |
| C  | -1.02348 | 3.22647  | -0.39933 |

|   |          |          |          |
|---|----------|----------|----------|
| C | -1.87942 | 3.67678  | 0.58902  |
| H | -1.76481 | 3.31934  | 1.61711  |
| C | -2.89103 | 4.57104  | 0.28554  |
| H | -3.55501 | 4.91678  | 1.08520  |
| C | -3.06414 | 5.00883  | -0.99267 |
| H | -3.87115 | 5.71244  | -1.22967 |
| C | -2.21642 | 4.57479  | -2.00363 |
| H | -2.34328 | 4.93573  | -3.02997 |
| C | -1.19328 | 3.69897  | -1.69678 |
| H | -0.50355 | 3.38193  | -2.48873 |
| C | 1.69419  | 2.83295  | -0.81639 |
| C | 2.08136  | 2.48505  | -2.10221 |
| H | 1.58210  | 1.65446  | -2.61593 |
| C | 3.09592  | 3.18383  | -2.76716 |
| H | 3.37827  | 2.88795  | -3.78343 |
| C | 3.71993  | 4.23441  | -2.13933 |
| H | 4.51551  | 4.78844  | -2.65108 |
| C | 3.34284  | 4.59029  | -0.86705 |
| H | 3.83770  | 5.42603  | -0.35926 |
| C | 2.32784  | 3.89814  | -0.20257 |
| H | 2.05499  | 4.19879  | 0.81204  |
| C | -3.22560 | 0.61741  | 1.30349  |
| C | -2.84477 | 0.66826  | 2.64409  |
| H | -2.00107 | 0.06678  | 2.98922  |
| C | -3.51005 | 1.48740  | 3.54090  |
| H | -3.18789 | 1.51347  | 4.58789  |
| C | -4.57626 | 2.27495  | 3.11630  |
| H | -5.10270 | 2.92374  | 3.82492  |
| C | -4.96166 | 2.22631  | 1.78490  |
| H | -5.79974 | 2.84089  | 1.43588  |
| C | -4.29824 | 1.41544  | 0.88695  |
| H | -4.61533 | 1.40706  | -0.15874 |
| C | -3.19437 | -0.13636 | -1.43000 |
| C | -2.69794 | 0.73869  | -2.36871 |
| H | -1.75432 | 1.25744  | -2.18247 |
| C | -3.39363 | 0.99910  | -3.55119 |
| H | -2.95688 | 1.69384  | -4.27731 |
| C | -4.57913 | 0.38910  | -3.80474 |
| H | -5.11709 | 0.57915  | -4.74041 |
| C | -5.12485 | -0.46314 | -2.85166 |
| H | -6.09392 | -0.94193 | -3.03318 |
| C | -4.44430 | -0.72719 | -1.67611 |
| H | -4.89048 | -1.39904 | -0.93775 |
| C | -3.00927 | -2.12414 | 0.51670  |
| C | -2.81081 | -3.13574 | -0.42230 |
| H | -2.25975 | -2.92742 | -1.34748 |
| C | -3.34222 | -4.40480 | -0.22006 |
| H | -3.17812 | -5.18776 | -0.96780 |
| C | -4.09642 | -4.65561 | 0.90911  |
| H | -4.53062 | -5.65006 | 1.06479  |
| C | -4.29604 | -3.66558 | 1.85115  |
| H | -4.89124 | -3.87017 | 2.74817  |
| C | -3.75013 | -2.39642 | 1.66332  |
| H | -3.92707 | -1.61348 | 2.40605  |

**3 (H atoms optimized)**

BP86 energy = -2733.13583983

|    |          |          |          |
|----|----------|----------|----------|
| Ru | -0.03277 | -0.26153 | 0.25189  |
| Zn | -0.00939 | -2.73906 | -0.35258 |
| Zn | -0.02886 | -0.72515 | -2.11370 |
| P  | 2.28690  | -0.72496 | 0.57264  |
| P  | 0.36892  | 1.95765  | -0.44189 |



P -2.35872 -0.36803 0.25476  
C -0.01464 -1.11693 -4.02647  
H 1.01935 -1.06905 -4.40290  
H -0.63819 -0.39406 -4.57849  
H -0.41049 -2.13054 -4.20392  
C 0.12494 -4.38111 -1.38236  
H -0.51497 -4.33834 -2.27831  
H -0.18879 -5.24023 -0.76576  
H 1.16917 -4.53081 -1.70102  
C 0.30370 -1.94616 1.61644  
C -0.41653 -2.76751 2.51084  
H -1.46704 -3.01062 2.32343  
C 0.19493 -3.26128 3.65036  
H -0.38264 -3.89324 4.33504  
C 1.52148 -2.97225 3.94783  
H 1.97517 -3.36899 4.86231  
C 2.26356 -2.19059 3.08514  
H 3.30902 -1.94610 3.30435  
C 1.66391 -1.74363 1.92043  
C 3.05108 -1.85680 -0.63040  
C 3.11391 -1.49417 -1.97291  
H 2.74046 -0.51531 -2.29497  
C 3.64754 -2.35939 -2.91322  
H 3.68474 -2.05969 -3.96564  
C 4.13542 -3.57713 -2.51750  
H 4.55629 -4.26477 -3.25948  
C 4.09531 -3.94909 -1.19075  
H 4.48592 -4.92322 -0.87843  
C 3.55532 -3.09084 -0.24188  
H 3.51782 -3.39808 0.80868  
C 3.69026 0.21287 1.25896  
C 4.91902 0.27561 0.62057  
H 5.08755 -0.25645 -0.32047  
C 5.94427 1.02626 1.18257  
H 6.91340 1.06529 0.67226  
C 5.76494 1.68546 2.35905  
H 6.58719 2.26687 2.79129  
C 4.55451 1.62536 3.00364  
H 4.39573 2.14718 3.95254  
C 3.52529 0.88597 2.44703  
H 2.56598 0.84269 2.97149  
C 1.72261 2.11596 -1.66739  
C 1.43338 1.85863 -3.00712  
H 0.39848 1.71548 -3.33676  
C 2.45369 1.76959 -3.95212  
H 2.20142 1.56591 -4.99803  
C 3.76404 1.93531 -3.56554  
H 4.57050 1.86237 -4.30286  
C 4.05664 2.21893 -2.24555  
H 5.09619 2.36775 -1.93469  
C 3.04929 2.30498 -1.29340  
H 3.31033 2.50880 -0.25261  
C -0.86120 3.22188 -0.95657  
C -1.94886 3.39758 -0.09746  
H -2.03546 2.78399 0.80466  
C -2.90718 4.34731 -0.35684  
H -3.74356 4.47389 0.33929  
C -2.81608 5.13284 -1.48295  
H -3.58319 5.88579 -1.69350  
C -1.75182 4.97696 -2.33846  
H -1.66445 5.61108 -3.22772  
C -0.76761 4.03907 -2.07946  
H 0.08602 3.95934 -2.75865

C 0.90852 2.75375 1.10530  
C 0.41520 2.20779 2.28349  
H -0.19770 1.29330 2.24062  
C 0.65987 2.79740 3.49702  
H 0.24629 2.35296 4.40915  
C 1.40523 3.95020 3.56559  
H 1.59987 4.42397 4.53383  
C 1.90483 4.50986 2.41147  
H 2.49129 5.43390 2.45691  
C 1.63291 3.93695 1.17582  
H 1.99493 4.42304 0.26374  
C -3.07218 0.47968 1.72090  
C -2.52917 0.19909 2.97467  
H -1.69508 -0.50728 3.06083  
C -3.05185 0.77784 4.11919  
H -2.62605 0.52219 5.09586  
C -4.09240 1.67472 4.02847  
H -4.50017 2.13947 4.93246  
C -4.61945 1.98646 2.79306  
H -5.44663 2.70041 2.71368  
C -4.12298 1.39009 1.64091  
H -4.56577 1.63921 0.67239  
C -3.07680 -2.05728 0.40515  
C -3.70249 -2.53451 1.55523  
H -3.81355 -1.88577 2.42915  
C -4.20746 -3.82025 1.60114  
H -4.69958 -4.17183 2.51470  
C -4.11222 -4.64938 0.50485  
H -4.52012 -5.66485 0.54277  
C -3.50951 -4.18660 -0.65076  
H -3.44300 -4.82910 -1.53483  
C -2.99511 -2.90232 -0.69915  
H -2.56219 -2.53896 -1.63954  
C -3.38482 0.21446 -1.15758  
C -4.74101 -0.09367 -1.21207  
H -5.20573 -0.67456 -0.40796  
C -5.51308 0.32381 -2.27405  
H -6.57890 0.07057 -2.29386  
C -4.95545 1.03565 -3.31478  
H -5.57554 1.35451 -4.15915  
C -3.61627 1.34439 -3.27944  
H -3.15775 1.91206 -4.09619  
C -2.83600 0.93211 -2.21657  
H -1.77409 1.18976 -2.19732

## 7 (H atoms optimized)

BP86 energy = -3349.79593122

Ru -0.59905 0.16976 -0.24351  
Zn 1.97236 0.02533 0.39694  
P -2.35600 1.67952 -0.77371  
P -0.51723 0.21442 2.13443  
P -1.61531 -1.86871 -0.67885  
N 4.49465 -1.04868 -0.94992  
N 4.58567 1.08100 -1.00196  
C -0.41557 0.98313 -2.16763  
C 0.51280 0.93710 -3.21505  
H 1.39346 0.28684 -3.15009  
C 0.31251 1.68723 -4.37772  
H 1.04589 1.62104 -5.19293  
C -0.80058 2.50167 -4.53323  
H -0.94488 3.06192 -5.46455  
C -1.72077 2.60507 -3.50677

|   |          |          |          |   |          |          |          |
|---|----------|----------|----------|---|----------|----------|----------|
| H | -2.61256 | 3.23549  | -3.61270 | H | -0.30158 | -5.66518 | -3.69917 |
| C | -1.49676 | 1.86685  | -2.34531 | C | -0.85322 | -4.04964 | -2.38750 |
| C | -2.49685 | 3.30647  | 0.03899  | H | -0.79769 | -4.67251 | -1.48940 |
| C | -2.85991 | 3.33890  | 1.38351  | C | -3.45363 | -2.03897 | -0.67651 |
| H | -2.99626 | 2.39988  | 1.93180  | C | -4.16740 | -1.38446 | 0.32313  |
| C | -3.05262 | 4.54672  | 2.04077  | H | -3.63428 | -0.73697 | 1.02708  |
| H | -3.34841 | 4.55242  | 3.09581  | C | -5.54423 | -1.53723 | 0.42729  |
| C | -2.85671 | 5.73767  | 1.36139  | H | -6.08760 | -1.01165 | 1.21980  |
| H | -3.00169 | 6.69419  | 1.87687  | C | -6.22937 | -2.33861 | -0.47617 |
| C | -2.46631 | 5.72115  | 0.02759  | H | -7.31589 | -2.45528 | -0.39569 |
| H | -2.30133 | 6.66297  | -0.50821 | C | -5.53075 | -2.97742 | -1.48301 |
| C | -2.29079 | 4.51336  | -0.63158 | H | -6.06179 | -3.60704 | -2.20692 |
| H | -1.98040 | 4.50391  | -1.68101 | C | -4.15280 | -2.83022 | -1.58882 |
| C | -4.13166 | 1.40621  | -1.22012 | H | -3.61587 | -3.35478 | -2.38493 |
| C | -5.18650 | 1.92639  | -0.47439 | C | -1.20136 | -3.21972 | 0.51925  |
| H | -4.98935 | 2.53909  | 0.41008  | C | -2.10479 | -4.22138 | 0.88069  |
| C | -6.50582 | 1.70700  | -0.86574 | H | -3.11432 | -4.23197 | 0.45836  |
| H | -7.31954 | 2.14097  | -0.27284 | C | -1.73023 | -5.21987 | 1.77427  |
| C | -6.78723 | 0.95477  | -1.98909 | H | -2.45461 | -5.99777 | 2.04364  |
| H | -7.82532 | 0.78352  | -2.29565 | C | -0.46044 | -5.23149 | 2.32947  |
| C | -5.74592 | 0.42268  | -2.72624 | H | -0.18137 | -6.01041 | 3.04864  |
| H | -5.95326 | -0.17779 | -3.61904 | C | 0.43415  | -4.24176 | 1.98596  |
| C | -4.42605 | 0.64886  | -2.34995 | H | 1.43576  | -4.21274 | 2.42806  |
| H | -3.61468 | 0.23374  | -2.95593 | C | 0.07070  | -3.25379 | 1.08260  |
| C | 0.34091  | 1.93327  | 0.53262  | H | 0.78635  | -2.46632 | 0.83296  |
| C | 0.83390  | 3.11916  | -0.01378 | C | 3.77141  | 0.05952  | -0.64294 |
| H | 1.02871  | 3.19373  | -1.09021 | C | 5.73373  | -0.72381 | -1.48200 |
| C | 1.00875  | 4.24497  | 0.80199  | H | 6.44331  | -1.48543 | -1.79249 |
| H | 1.32856  | 5.19056  | 0.35244  | C | 5.78965  | 0.61404  | -1.51217 |
| C | 0.77134  | 4.18543  | 2.16306  | H | 6.57290  | 1.29485  | -1.83514 |
| H | 0.92700  | 5.07474  | 2.78561  | C | 4.09503  | -2.40986 | -0.67849 |
| C | 0.33496  | 3.00096  | 2.74760  | C | 3.10558  | -2.99713 | -1.47657 |
| H | 0.18858  | 2.94694  | 3.83274  | C | 2.72921  | -4.29736 | -1.16677 |
| C | 0.10082  | 1.91410  | 1.92656  | H | 1.95059  | -4.77055 | -1.77600 |
| C | 2.08019  | -0.59218 | 2.31790  | C | 3.32985  | -5.01924 | -0.13896 |
| C | 3.18720  | -1.13583 | 2.98117  | C | 4.34234  | -4.41225 | 0.59443  |
| H | 4.16411  | -1.13945 | 2.48365  | H | 4.84338  | -4.97273 | 1.39294  |
| C | 3.10020  | -1.69290 | 4.25947  | C | 4.75067  | -3.10275 | 0.33414  |
| H | 3.98910  | -2.13327 | 4.72924  | C | 2.48736  | -2.28112 | -2.64953 |
| C | 1.89409  | -1.67610 | 4.93336  | H | 1.66626  | -1.62034 | -2.32158 |
| H | 1.81058  | -2.10291 | 5.93999  | H | 2.05488  | -3.00263 | -3.35962 |
| C | 0.77342  | -1.09588 | 4.33056  | H | 3.22319  | -1.65795 | -3.18486 |
| H | -0.17595 | -1.06288 | 4.87570  | C | 2.89467  | -6.43236 | 0.15988  |
| C | 0.87580  | -0.57970 | 3.04183  | H | 1.90891  | -6.43759 | 0.65992  |
| C | -1.86401 | 0.14114  | 3.36313  | H | 3.60944  | -6.94803 | 0.82165  |
| C | -2.18081 | 1.17445  | 4.23241  | H | 2.79255  | -7.02772 | -0.76374 |
| H | -1.66526 | 2.13481  | 4.15222  | C | 5.91323  | -2.52452 | 1.11701  |
| C | -3.14305 | 0.99619  | 5.22114  | H | 6.87805  | -2.77419 | 0.63660  |
| H | -3.37065 | 1.81617  | 5.91198  | H | 5.94006  | -2.94745 | 2.13375  |
| C | -3.80294 | -0.21256 | 5.33474  | H | 5.86943  | -1.42826 | 1.20381  |
| H | -4.55826 | -0.35295 | 6.11670  | C | 4.32511  | 2.48686  | -0.82147 |
| C | -3.52555 | -1.23899 | 4.45063  | C | 4.06653  | 3.26641  | -1.94409 |
| H | -4.05563 | -2.19478 | 4.52956  | C | 3.88182  | 4.63367  | -1.75704 |
| C | -2.55174 | -1.07100 | 3.47051  | H | 3.67353  | 5.26497  | -2.62896 |
| H | -2.31000 | -1.89853 | 2.79405  | C | 3.95165  | 5.20134  | -0.49350 |
| C | -1.22029 | -2.70153 | -2.27933 | C | 4.21854  | 4.39135  | 0.60291  |
| C | -1.29458 | -1.93663 | -3.44494 | H | 4.26637  | 4.83284  | 1.60452  |
| H | -1.55246 | -0.87656 | -3.37437 | C | 4.40271  | 3.01375  | 0.46487  |
| C | -1.02432 | -2.49718 | -4.68639 | C | 3.97871  | 2.67340  | -3.32567 |
| H | -1.09059 | -1.87705 | -5.58722 | H | 4.86974  | 2.08064  | -3.59456 |
| C | -0.65904 | -3.83494 | -4.78060 | H | 3.86227  | 3.46712  | -4.08000 |
| H | -0.44195 | -4.28025 | -5.75824 | H | 3.10412  | 2.00438  | -3.41050 |
| C | -0.57811 | -4.60611 | -3.62957 | C | 3.71236  | 6.68251  | -0.32017 |

|   |         |          |          |
|---|---------|----------|----------|
| H | 4.00350 | 7.02858  | 0.68476  |
| H | 2.64473 | 6.93408  | -0.45916 |
| H | 4.27723 | 7.27459  | -1.06107 |
| C | 4.61842 | 2.15207  | 1.68034  |
| H | 3.70313 | 1.59447  | 1.95051  |
| H | 4.89748 | 2.77020  | 2.54836  |
| H | 5.41479 | 1.40318  | 1.52615  |
| H | 0.75340 | -0.74081 | -0.66195 |

**12 (H atoms optimized)**

BP86 energy = -2735.57166107

|    |          |          |          |
|----|----------|----------|----------|
| Ru | 0.00816  | -0.35771 | 0.01332  |
| Zn | -0.35970 | -1.63891 | 2.15053  |
| Zn | 0.11345  | -2.08797 | -1.84169 |
| P  | -2.33935 | -0.72216 | -0.10110 |
| P  | 0.01834  | 2.05118  | 0.01154  |
| P  | 2.37213  | -0.59972 | -0.03822 |
| C  | -0.64883 | -2.78166 | 3.68261  |
| H  | -1.70760 | -2.74039 | 3.98146  |
| H  | -0.02992 | -2.44366 | 4.53078  |
| H  | -0.38215 | -3.82939 | 3.46364  |
| C  | 0.13898  | -3.43280 | -3.23503 |
| H  | -0.59222 | -4.22366 | -3.00983 |
| H  | 1.14324  | -3.87798 | -3.30800 |
| H  | -0.11884 | -2.98501 | -4.20979 |
| C  | -2.75143 | -2.27978 | -0.99659 |
| C  | -2.31630 | -3.51481 | -0.48974 |
| H  | -1.72967 | -3.55698 | 0.43528  |
| C  | -2.64016 | -4.69754 | -1.13176 |
| H  | -2.31183 | -5.65126 | -0.70498 |
| C  | -3.34858 | -4.67335 | -2.32496 |
| H  | -3.57883 | -5.60841 | -2.84595 |
| C  | -3.76904 | -3.46608 | -2.84149 |
| H  | -4.33794 | -3.43587 | -3.77687 |
| C  | -3.50384 | -2.27715 | -2.17020 |
| H  | -3.88128 | -1.33844 | -2.58282 |
| C  | -3.13489 | -0.97571 | 1.53468  |
| C  | -3.84232 | -2.12406 | 1.88873  |
| H  | -4.01619 | -2.92467 | 1.16629  |
| C  | -4.33923 | -2.25798 | 3.18709  |
| H  | -4.87928 | -3.17288 | 3.45466  |
| C  | -4.17652 | -1.25745 | 4.11737  |
| H  | -4.58018 | -1.37616 | 5.12857  |
| C  | -3.50444 | -0.10206 | 3.76574  |
| H  | -3.37378 | 0.71118  | 4.48691  |
| C  | -2.97102 | 0.02940  | 2.49103  |
| H  | -2.42174 | 0.93764  | 2.23624  |
| C  | -3.44665 | 0.47079  | -0.93688 |
| C  | -4.68395 | 0.83210  | -0.40966 |
| H  | -5.01923 | 0.41175  | 0.54308  |
| C  | -5.49930 | 1.73632  | -1.08272 |
| H  | -6.46859 | 2.01125  | -0.65323 |
| C  | -5.09099 | 2.27898  | -2.28775 |
| H  | -5.73297 | 2.99214  | -2.81576 |
| C  | -3.86731 | 1.91480  | -2.82999 |
| H  | -3.53526 | 2.33930  | -3.78300 |
| C  | -3.04367 | 1.01548  | -2.15532 |
| H  | -2.07437 | 0.74264  | -2.58081 |
| C  | -1.29442 | 2.80159  | 1.07052  |
| C  | -2.53197 | 3.15415  | 0.53613  |
| H  | -2.70932 | 3.09502  | -0.54004 |
| C  | -3.55967 | 3.58769  | 1.36377  |

|   |          |          |          |
|---|----------|----------|----------|
| H | -4.52344 | 3.85816  | 0.92115  |
| C | -3.37114 | 3.68208  | 2.73542  |
| H | -4.18673 | 4.02530  | 3.38069  |
| C | -2.13866 | 3.36179  | 3.27472  |
| H | -1.96065 | 3.46097  | 4.35109  |
| C | -1.10729 | 2.93135  | 2.44936  |
| H | -0.14077 | 2.69731  | 2.90114  |
| C | -0.20271 | 2.99112  | -1.55115 |
| C | -0.50954 | 4.35909  | -1.52020 |
| H | -0.64792 | 4.86740  | -0.56083 |
| C | -0.64882 | 5.07652  | -2.69271 |
| H | -0.89029 | 6.14385  | -2.64866 |
| C | -0.48844 | 4.45010  | -3.92092 |
| H | -0.60284 | 5.02360  | -4.84704 |
| C | -0.18917 | 3.09898  | -3.97210 |
| H | -0.06856 | 2.59421  | -4.93671 |
| C | -0.04875 | 2.37734  | -2.78996 |
| H | 0.16177  | 1.30447  | -2.83152 |
| C | 1.51228  | 2.83294  | 0.77299  |
| C | 1.99086  | 2.30441  | 1.97636  |
| H | 1.54707  | 1.39191  | 2.37860  |
| C | 3.02770  | 2.91558  | 2.65915  |
| H | 3.38122  | 2.48330  | 3.60178  |
| C | 3.60913  | 4.06791  | 2.15872  |
| H | 4.42109  | 4.56048  | 2.70387  |
| C | 3.16854  | 4.57883  | 0.94766  |
| H | 3.63541  | 5.47482  | 0.52500  |
| C | 2.12600  | 3.96162  | 0.25337  |
| H | 1.80527  | 4.38255  | -0.70244 |
| C | 2.86433  | -2.10296 | -0.99971 |
| C | 2.53743  | -3.35399 | -0.44879 |
| H | 1.98362  | -3.40909 | 0.49508  |
| C | 2.94723  | -4.52527 | -1.06471 |
| H | 2.69590  | -5.49103 | -0.61360 |
| C | 3.68048  | -4.47254 | -2.23806 |
| H | 4.00862  | -5.39886 | -2.72135 |
| C | 4.00048  | -3.25000 | -2.79649 |
| H | 4.58308  | -3.20172 | -3.72246 |
| C | 3.59698  | -2.06453 | -2.18006 |
| H | 3.88862  | -1.10769 | -2.62167 |
| C | 3.31685  | -1.00562 | 1.48865  |
| C | 2.75623  | -0.93151 | 2.75851  |
| H | 1.73177  | -0.56667 | 2.88442  |
| C | 3.47215  | -1.33458 | 3.88299  |
| H | 3.00549  | -1.28468 | 4.87217  |
| C | 4.76684  | -1.79016 | 3.74031  |
| H | 5.33475  | -2.10862 | 4.62117  |
| C | 5.35086  | -1.85449 | 2.48438  |
| H | 6.37774  | -2.21759 | 2.37212  |
| C | 4.63031  | -1.47153 | 1.36005  |
| H | 5.09268  | -1.55125 | 0.37111  |
| C | 3.35675  | 0.72513  | -0.83196 |
| C | 4.42901  | 1.36151  | -0.20535 |
| H | 4.73648  | 1.07192  | 0.80217  |
| C | 5.09938  | 2.39031  | -0.85996 |
| H | 5.93462  | 2.88791  | -0.35583 |
| C | 4.72734  | 2.78078  | -2.13176 |
| H | 5.26705  | 3.58672  | -2.64018 |
| C | 3.66202  | 2.15539  | -2.75766 |
| H | 3.35475  | 2.46094  | -3.76339 |
| C | 2.97662  | 1.13740  | -2.11062 |
| H | 2.13587  | 0.64897  | -2.61062 |
| H | -0.01767 | 0.05964  | 1.65303  |

H 0.02891 -0.26364 -1.67713  
H 0.07247 -2.03672 0.17201

**13+ (H atoms optimized)**

BP86 energy = -2795.50443825

Ru 0.14883 0.16132 -0.11452  
H -0.16952 -0.98903 -1.63060  
H 1.19120 0.24748 -2.12997  
Zn -1.53491 -0.78913 1.30667  
O 0.60977 1.49868 2.50610  
N 1.70870 -2.15195 1.32527  
N 3.12107 -0.91640 0.26719  
N -1.92423 2.51153 -0.48530  
N -2.52348 0.82644 -1.67703  
C 1.78053 -1.05399 0.49395  
C 3.86365 -1.86477 0.96476  
H 4.94877 -1.88038 0.93177  
C 2.98197 -2.64713 1.61263  
H 3.12790 -3.51089 2.25484  
C 3.74244 0.03933 -0.62225  
C 4.14002 1.27618 -0.10955  
C 4.77266 2.15515 -0.99221  
H 5.10244 3.13348 -0.62874  
C 4.99038 1.80473 -2.30452  
H 5.47915 2.51569 -2.98031  
C 4.63371 0.55920 -2.77471  
H 4.85202 0.29313 -3.81287  
C 4.02416 -0.37938 -1.93631  
C 3.71886 -1.77651 -2.44937  
H 2.84241 -2.16272 -1.89551  
C 3.40763 -1.82700 -3.94978  
H 4.31848 -1.68166 -4.55613  
H 2.67981 -1.06285 -4.26402  
H 3.00785 -2.81935 -4.22008  
C 4.89721 -2.71743 -2.16466  
H 5.81300 -2.35071 -2.66031  
H 4.68883 -3.72934 -2.55376  
H 5.11347 -2.81612 -1.09059  
C 4.02470 1.62625 1.35414  
H 3.34537 0.90241 1.83651  
C 3.46945 3.01672 1.60773  
H 4.14559 3.80664 1.23463  
H 3.34693 3.18586 2.69075  
H 2.48580 3.16374 1.13585  
C 5.42561 1.45274 2.00312  
H 6.15343 2.15234 1.55719  
H 5.81713 0.43085 1.86591  
H 5.37883 1.65749 3.08661  
C 0.51780 -2.82102 1.80623  
C -0.84635 -3.48744 3.63637  
H -1.09576 -3.46281 4.70240  
C -1.61519 -4.23862 2.78012  
H -2.46803 -4.80522 3.16933  
C -1.31303 -4.28890 1.43454  
H -1.92211 -4.90370 0.76567  
C -0.21829 -3.59578 0.91949  
C 0.25442 -2.74429 3.17926  
C 1.09359 -1.93147 4.15180  
H 1.80753 -1.31961 3.57480  
C 0.23664 -0.99008 4.98710  
H -0.34870 -0.29863 4.35970  
H 0.87394 -0.37845 5.64852

H -0.46878 -1.53919 5.63453  
C 1.89881 -2.86324 5.08374  
H 1.22418 -3.48256 5.69980  
H 2.52854 -2.27052 5.76864  
H 2.55895 -3.55005 4.52736  
C 0.19240 -3.76012 -0.53598  
H 0.69046 -2.82379 -0.83970  
C 1.19606 -4.87751 -0.67261  
H 2.09649 -4.71339 -0.05673  
H 1.52794 -4.98471 -1.72085  
H 0.76114 -5.84643 -0.36740  
C -0.99376 -3.96742 -1.48510  
H -1.48381 -4.94447 -1.32840  
H -0.64544 -3.95461 -2.53070  
H -1.75778 -3.18133 -1.37196  
C -1.53990 1.23012 -0.78324  
C -3.05154 2.89883 -1.17380  
H -3.46958 3.89622 -1.07325  
C -3.43099 1.85319 -1.91021  
H -4.24831 1.73406 -2.61512  
C -1.21659 3.44114 0.35631  
C -1.66338 3.64482 1.67349  
C -1.01581 4.62329 2.40673  
H -1.33017 4.81909 3.43706  
C 0.03496 5.37150 1.86716  
H 0.52916 6.13620 2.47464  
C 0.42440 5.15398 0.56369  
H 1.22957 5.76317 0.13613  
C -0.19409 4.20393 -0.23156  
C 0.18851 4.04088 -1.70520  
H -0.46630 3.26811 -2.14370  
C -0.06065 5.33738 -2.45924  
H -1.11032 5.66518 -2.37236  
H 0.16627 5.21780 -3.53354  
H 0.57293 6.15955 -2.08296  
C 1.62078 3.54805 -1.82730  
H 2.34002 4.26866 -1.40039  
H 1.90120 3.39769 -2.88541  
H 1.76137 2.59065 -1.29568  
C -2.83363 2.89490 2.25436  
H -3.02218 2.00881 1.61898  
C -4.07667 3.75835 2.24013  
H -4.94432 3.20987 2.64731  
H -4.34706 4.09844 1.22558  
H -3.93746 4.66237 2.85940  
C -2.57181 2.39890 3.66414  
H -1.64598 1.80547 3.73139  
H -3.40899 1.76900 4.00997  
H -2.48338 3.23182 4.38370  
C -2.68806 -0.43083 -2.37065  
C -3.83479 -1.20205 -2.11032  
C -4.04495 -2.32116 -2.92202  
H -4.93162 -2.93956 -2.74970  
C -3.17079 -2.66528 -3.92249  
H -3.36354 -3.54292 -4.54791  
C -2.04257 -1.88437 -4.15246  
H -1.35775 -2.16347 -4.95932  
C -1.78066 -0.76546 -3.39465  
C -4.81904 -0.90055 -1.00763  
H -4.40545 -0.10773 -0.35988  
C -6.17537 -0.39744 -1.59102  
H -6.06047 0.52232 -2.18704  
H -6.88767 -0.18589 -0.77583

|   |          |          |          |
|---|----------|----------|----------|
| H | -6.62601 | -1.16440 | -2.24366 |
| C | -5.05573 | -2.15018 | -0.14681 |
| H | -5.57999 | -2.94118 | -0.70902 |
| H | -5.68500 | -1.90166 | 0.72453  |
| H | -4.10915 | -2.57008 | 0.23036  |
| C | -0.52335 | 0.04269  | -3.55027 |
| H | -0.74538 | 1.09742  | -3.31348 |
| C | 0.12361  | -0.01121 | -4.94076 |
| H | 1.01119  | 0.64270  | -4.97524 |
| H | -0.57766 | 0.33560  | -5.71772 |
| H | 0.45344  | -1.02845 | -5.21051 |
| C | 0.43958  | -0.50227 | -2.46698 |
| H | 1.00490  | -1.37087 | -2.83921 |
| C | 0.41362  | 1.03855  | 1.47785  |
| C | -3.03919 | -1.07401 | 2.51432  |
| H | -3.88378 | -0.42793 | 2.22111  |
| H | -2.72676 | -0.80417 | 3.53622  |
| H | -3.36948 | -2.12251 | 2.51037  |

**14<sup>+</sup> (H atoms optimized)**

BP86 energy = -2796.70924769

|    |          |          |          |
|----|----------|----------|----------|
| Ru | 0.05345  | -0.02299 | 0.21350  |
| H  | -0.81612 | 1.27560  | -0.11540 |
| H  | 0.35470  | -0.41163 | -1.46268 |
| Zn | -1.09855 | 0.53220  | -1.91106 |
| O  | -0.22850 | 1.20175  | 2.96926  |
| N  | -2.81309 | -1.21334 | 0.81732  |
| N  | -1.74161 | -2.50145 | -0.52683 |
| N  | 2.97542  | 1.14146  | 0.64748  |
| N  | 1.71957  | 2.56551  | -0.35122 |
| C  | -0.15893 | 0.64429  | 1.97443  |
| C  | -2.47328 | 0.94679  | -3.21484 |
| H  | -3.29212 | 0.20924  | -3.18047 |
| H  | -2.05714 | 0.95841  | -4.23454 |
| H  | -2.88493 | 1.94491  | -2.99766 |
| C  | -1.61391 | -1.32130 | 0.17480  |
| C  | -3.63532 | -2.29422 | 0.54433  |
| H  | -4.62384 | -2.38319 | 0.98481  |
| C  | -2.96995 | -3.09201 | -0.28707 |
| H  | -3.23671 | -4.04870 | -0.72603 |
| C  | -3.17759 | -0.23363 | 1.82022  |
| C  | -3.88936 | 0.91289  | 1.43121  |
| C  | -4.27691 | 1.78669  | 2.43982  |
| H  | -4.82928 | 2.69529  | 2.18338  |
| C  | -3.98000 | 1.52478  | 3.76523  |
| H  | -4.29577 | 2.22989  | 4.54159  |
| C  | -3.29887 | 0.37880  | 4.11684  |
| H  | -3.08037 | 0.18498  | 5.17184  |
| C  | -2.89013 | -0.53919 | 3.15764  |
| C  | -4.26507 | 1.15968  | -0.03066 |
| H  | -3.48092 | 0.69939  | -0.65949 |
| C  | -5.59265 | 0.49444  | -0.37058 |
| H  | -5.58094 | -0.59531 | -0.20634 |
| H  | -5.85330 | 0.66502  | -1.42975 |
| H  | -6.40908 | 0.91289  | 0.24446  |
| C  | -4.34622 | 2.63614  | -0.39197 |
| H  | -5.17424 | 3.14430  | 0.13269  |
| H  | -4.54515 | 2.74711  | -1.47128 |
| H  | -3.41426 | 3.17626  | -0.16446 |
| C  | -2.18618 | -1.83092 | 3.55453  |
| H  | -1.64321 | -2.20104 | 2.66652  |
| C  | -3.20493 | -2.88976 | 3.96264  |

|   |          |          |          |
|---|----------|----------|----------|
| H | -3.78019 | -2.55898 | 4.84541  |
| H | -2.70255 | -3.83602 | 4.22983  |
| H | -3.92943 | -3.11313 | 3.16275  |
| C | -1.16298 | -1.65259 | 4.66988  |
| H | -0.44582 | -0.84568 | 4.45786  |
| H | -0.59942 | -2.58985 | 4.81937  |
| H | -1.64411 | -1.42050 | 5.63646  |
| C | -0.72108 | -3.20925 | -1.27311 |
| C | 0.31796  | -3.81681 | -0.54914 |
| C | 1.23013  | -4.58780 | -1.26628 |
| H | 2.05127  | -5.08179 | -0.73891 |
| C | 1.09696  | -4.75776 | -2.63651 |
| H | 1.81991  | -5.37804 | -3.17711 |
| C | 0.06316  | -4.16677 | -3.31189 |
| H | -0.03363 | -4.32524 | -4.39102 |
| C | -0.88901 | -3.38000 | -2.65661 |
| C | 0.45265  | -3.60560 | 0.93972  |
| H | -0.55654 | -3.42849 | 1.35082  |
| C | 1.05337  | -4.79811 | 1.69656  |
| H | 0.47836  | -5.72221 | 1.52010  |
| H | 1.04897  | -4.59905 | 2.78154  |
| H | 2.10138  | -4.98769 | 1.40951  |
| C | 1.31249  | -2.36112 | 1.21285  |
| H | 2.38559  | -2.60079 | 1.13741  |
| H | 1.12426  | -1.92962 | 2.20462  |
| H | 1.21055  | -1.59275 | 0.38149  |
| C | -2.05552 | -2.79719 | -3.43553 |
| H | -2.56591 | -2.05480 | -2.79599 |
| C | -3.06453 | -3.90083 | -3.79111 |
| H | -2.59855 | -4.66323 | -4.43929 |
| H | -3.92632 | -3.47952 | -4.33683 |
| H | -3.45501 | -4.42302 | -2.90211 |
| C | -1.59755 | -2.08787 | -4.70658 |
| H | -0.83464 | -1.31929 | -4.49825 |
| H | -2.45103 | -1.59205 | -5.19863 |
| H | -1.16844 | -2.79304 | -5.43893 |
| C | 1.70844  | 1.27324  | 0.12663  |
| C | 3.71291  | 2.30725  | 0.50577  |
| H | 4.73885  | 2.37539  | 0.85604  |
| C | 2.92962  | 3.19386  | -0.10625 |
| H | 3.10440  | 4.22580  | -0.39702 |
| C | 3.63154  | -0.08491 | 1.04971  |
| C | 3.79123  | -0.36143 | 2.41428  |
| C | 4.51471  | -1.50859 | 2.74159  |
| H | 4.66918  | -1.76206 | 3.79509  |
| C | 5.03980  | -2.32467 | 1.76357  |
| H | 5.60555  | -3.21755 | 2.05310  |
| C | 4.88102  | -2.02069 | 0.43690  |
| H | 5.32228  | -2.66823 | -0.32824 |
| C | 4.17796  | -0.88163 | 0.04006  |
| C | 3.26922  | 0.54961  | 3.50696  |
| H | 2.52924  | 1.23724  | 3.06198  |
| C | 2.57443  | -0.23221 | 4.62919  |
| H | 1.79358  | -0.90635 | 4.24184  |
| H | 2.09732  | 0.46396  | 5.33924  |
| H | 3.28839  | -0.84374 | 5.20732  |
| C | 4.41446  | 1.38835  | 4.08432  |
| H | 5.19014  | 0.74280  | 4.53196  |
| H | 4.04407  | 2.06462  | 4.87404  |
| H | 4.90512  | 2.00955  | 3.31605  |
| C | 4.06016  | -0.53204 | -1.42601 |
| H | 3.33007  | 0.28880  | -1.51545 |
| C | 3.52997  | -1.67907 | -2.26915 |

|   |          |          |          |   |          |          |          |
|---|----------|----------|----------|---|----------|----------|----------|
| H | 4.22219  | -2.53972 | -2.28289 | C | -2.34062 | 3.41435  | -1.93122 |
| H | 3.40521  | -1.35553 | -3.31717 | H | -2.89216 | 2.73770  | -1.25688 |
| H | 2.55231  | -2.04062 | -1.91139 | C | -2.10464 | 2.68796  | -3.22628 |
| C | 5.38214  | -0.02158 | -1.97822 | H | -1.55125 | 3.30554  | -3.95570 |
| H | 5.75598  | 0.85333  | -1.41956 | H | -3.06567 | 2.41701  | -3.69775 |
| H | 5.27537  | 0.27608  | -3.03586 | H | -1.53453 | 1.75378  | -3.08644 |
| H | 6.16552  | -0.79931 | -1.93318 | C | -3.22526 | 4.63456  | -2.18805 |
| C | 0.68207  | 3.18637  | -1.13510 | H | -3.44584 | 5.19290  | -1.26219 |
| C | 0.68903  | 2.97736  | -2.53091 | H | -4.18794 | 4.33059  | -2.63409 |
| C | -0.30575 | 3.60663  | -3.26250 | H | -2.74521 | 5.33878  | -2.88955 |
| H | -0.33657 | 3.46527  | -4.34765 | C | 0.59102  | 3.63095  | 2.21995  |
| C | -1.24965 | 4.42045  | -2.66478 | H | -0.00737 | 2.73960  | 2.47183  |
| H | -2.01821 | 4.90573  | -3.27522 | C | 2.04598  | 3.32179  | 2.56206  |
| C | -1.20113 | 4.63766  | -1.30800 | H | 2.45187  | 2.50420  | 1.94591  |
| H | -1.92820 | 5.31175  | -0.84225 | H | 2.12907  | 3.01705  | 3.61866  |
| C | -0.23153 | 4.03476  | -0.50696 | H | 2.69833  | 4.20316  | 2.43089  |
| C | 1.79122  | 2.18006  | -3.21422 | C | 0.07544  | 4.79632  | 3.07014  |
| H | 2.16658  | 1.44117  | -2.48556 | H | 0.63739  | 5.72196  | 2.85421  |
| C | 1.33769  | 1.40305  | -4.44826 | H | 0.19130  | 4.57765  | 4.14597  |
| H | 0.48528  | 0.73499  | -4.23413 | H | -0.99173 | 5.00714  | 2.88468  |
| H | 2.16547  | 0.77892  | -4.82460 | C | -3.34962 | -0.42985 | 1.50819  |
| H | 1.03867  | 2.06910  | -5.27652 | C | -3.99013 | -0.96661 | 0.37869  |
| C | 2.94877  | 3.10960  | -3.58458 | C | -4.55436 | -2.22869 | 0.51832  |
| H | 2.61854  | 3.87571  | -4.30826 | H | -5.05690 | -2.68754 | -0.33898 |
| H | 3.77169  | 2.54168  | -4.05240 | C | -4.51298 | -2.89714 | 1.71792  |
| H | 3.36368  | 3.63476  | -2.70989 | H | -4.98200 | -3.88332 | 1.80727  |
| C | -0.15087 | 4.37710  | 0.97033  | C | -3.89259 | -2.33521 | 2.81696  |
| H | 0.61339  | 3.72934  | 1.43414  | H | -3.87306 | -2.88037 | 3.76539  |
| C | -1.46617 | 4.14140  | 1.71194  | C | -3.28314 | -1.08333 | 2.73074  |
| H | -2.26522 | 4.81151  | 1.34834  | C | -4.10929 | -0.19095 | -0.91504 |
| H | -1.33683 | 4.34771  | 2.78796  | H | -3.29426 | 0.55341  | -0.93818 |
| H | -1.82052 | 3.10415  | 1.61303  | C | -3.94614 | -1.05003 | -2.15646 |
| C | 0.30039  | 5.83371  | 1.12993  | H | -3.00260 | -1.61762 | -2.14539 |
| H | 1.26785  | 6.02614  | 0.63513  | H | -3.94757 | -0.41350 | -3.05814 |
| H | 0.41070  | 6.09246  | 2.19714  | H | -4.77365 | -1.77102 | -2.28068 |
| H | -0.43655 | 6.53033  | 0.69374  | C | -5.43800 | 0.57486  | -0.95140 |

**15<sup>+</sup> (H atoms optimized)**

BP86 energy = -2797.90221779

|    |          |          |          |   |          |          |          |
|----|----------|----------|----------|---|----------|----------|----------|
| Ru | -0.05055 | -0.03658 | 0.20978  | H | -5.51719 | 1.17467  | -1.87490 |
| H  | -0.61170 | 0.13249  | -1.40400 | H | -5.54907 | 1.26045  | -0.09520 |
| H  | 0.96445  | 1.27023  | 0.14319  | C | -2.60788 | -0.48551 | 3.94768  |
| Zn | 0.74984  | 1.35591  | -1.70637 | H | -1.95502 | 0.33644  | 3.60281  |
| O  | 0.80407  | 0.12737  | 3.11728  | C | -1.72670 | -1.49623 | 4.67367  |
| N  | -1.67304 | 2.60670  | 0.76122  | H | -2.31959 | -2.29079 | 5.15922  |
| N  | -2.80166 | 0.89999  | 1.38811  | H | -1.15077 | -0.99624 | 5.47068  |
| N  | 1.35750  | -2.28297 | -1.45104 | H | -1.00900 | -1.98145 | 3.99250  |
| N  | 2.80301  | -1.36309 | -0.16470 | C | -3.65200 | 0.12039  | 4.89239  |
| C  | -1.61756 | 1.23876  | 0.79352  | H | -3.16582 | 0.57471  | 5.77298  |
| C  | -2.84254 | 3.08953  | 1.32716  | H | -4.35148 | -0.65206 | 5.25772  |
| H  | -3.05614 | 4.15289  | 1.38390  | H | -4.25249 | 0.90385  | 4.40069  |
| C  | -3.54881 | 2.01721  | 1.70904  | C | 1.47348  | -1.30597 | -0.49298 |
| H  | -4.52106 | 1.93350  | 2.18611  | C | 2.56559  | -2.90917 | -1.68848 |
| C  | -0.75081 | 3.47664  | 0.07567  | H | 2.65346  | -3.72222 | -2.40308 |
| C  | -1.06010 | 3.85163  | -1.23012 | C | 3.47320  | -2.33228 | -0.89418 |
| C  | -0.16568 | 4.73104  | -1.86445 | H | 4.53572  | -2.51198 | -0.76458 |
| H  | -0.37498 | 5.05166  | -2.89048 | C | 0.14366  | -2.82153 | -2.03501 |
| C  | 0.94705  | 5.19782  | -1.22016 | C | -0.23759 | -2.37760 | -3.31186 |
| H  | 1.62365  | 5.88630  | -1.73901 | C | -1.32481 | -3.03961 | -3.89005 |
| C  | 1.22241  | 4.82348  | 0.07863  | H | -1.65949 | -2.73615 | -4.88689 |
| H  | 2.10292  | 5.22506  | 0.58910  | C | -1.97380 | -4.04869 | -3.24617 |
| C  | 0.36632  | 3.95646  | 0.76293  | H | -2.81899 | -4.54695 | -3.73486 |
|    |          |          |          | C | -1.58264 | -4.45379 | -1.99482 |
|    |          |          |          | H | -2.10687 | -5.27384 | -1.49406 |
|    |          |          |          | C | -0.48659 | -3.84927 | -1.35925 |

C 0.48468 -1.27690 -4.03172  
 H 0.91199 -0.60733 -3.26002  
 C 1.66143 -1.79595 -4.86248  
 H 2.41345 -2.32258 -4.25414  
 H 2.17195 -0.95917 -5.36968  
 H 1.31173 -2.49531 -5.64275  
 C -0.41928 -0.44160 -4.91070  
 H -0.76066 -0.99969 -5.80068  
 H 0.12161 0.44317 -5.28433  
 H -1.31783 -0.09188 -4.37529  
 C 0.01055 -4.40139 -0.03906  
 H 0.73481 -3.68216 0.38417  
 C -1.07357 -4.61014 1.00147  
 H -1.64983 -3.69211 1.20475  
 H -0.62594 -4.94512 1.95288  
 H -1.79574 -5.38919 0.69953  
 C 0.77779 -5.71888 -0.28899  
 H 0.10812 -6.48764 -0.71246  
 H 1.18964 -6.11437 0.65536  
 H 1.61543 -5.58196 -0.99222  
 C 3.48377 -0.63432 0.88309  
 C 3.50883 -1.20216 2.16601  
 C 4.23311 -0.52865 3.14002  
 H 4.27428 -0.93144 4.15593  
 C 4.90236 0.64685 2.84885  
 H 5.46275 1.16071 3.63755  
 C 4.88333 1.16371 1.57528  
 H 5.44068 2.07954 1.35804  
 C 4.18987 0.52351 0.54685  
 C 4.27432 1.04427 -0.87216  
 H 3.39739 0.66827 -1.43240  
 C 5.53493 0.50080 -1.56467  
 H 6.44458 0.83605 -1.03622  
 H 5.59572 0.86622 -2.60443  
 H 5.55601 -0.60039 -1.59612  
 C 4.25173 2.57188 -0.94563  
 H 3.37001 2.99852 -0.43976  
 H 4.23094 2.89867 -1.99809  
 H 5.15350 3.01919 -0.49321  
 C 2.83751 -2.53072 2.48729  
 H 1.95201 -2.62798 1.83088  
 C 3.78253 -3.70055 2.18193  
 H 4.08971 -3.73968 1.12610  
 H 3.29667 -4.66248 2.42183  
 H 4.69718 -3.62831 2.79641  
 C 2.35516 -2.64116 3.93179  
 H 3.19815 -2.72402 4.64018  
 H 1.75512 -3.55895 4.05548  
 H 1.73776 -1.78412 4.23913  
 C 0.50952 -0.02094 2.03292  
 C 1.61579 2.15102 -3.24502  
 H 0.87324 2.34426 -4.03571  
 H 2.39321 1.48385 -3.65420  
 H 2.08257 3.10860 -2.96966  
 H -1.42514 -1.13244 0.28431  
 H -0.73672 -1.64122 0.33990

#### ZnMeH

BP86 energy = -267.732063359  
 Enthalpy 0K = -267.691450  
 Enthalpy 298K = -267.686684  
 Free energy 298K = -267.716458  
 Low Freq. = 435.2689 cm<sup>-1</sup>

Zn 0.42778 0.00009 0.00006  
 C -1.51237 -0.00012 -0.00008  
 H -1.90779 0.40518 -0.94742  
 H -1.90798 0.61754 0.82457  
 H -1.90765 -1.02325 0.12248  
 H 1.96410 -0.00156 -0.00109

#### Functional screening

##### 2\_bp86

BP86 energy = -2732.72996875  
 Enthalpy 0K = -2731.880442  
 Enthalpy 298K = -2731.816941  
 Free energy 298K = -2731.982300  
 Low Freq. = 13.6828 cm<sup>-1</sup>

Ru 0.02231 -0.36429 0.22856  
 Zn 0.11304 -0.24706 -2.29095  
 Zn 0.09288 -2.54821 -1.05624  
 P 2.38836 -0.84115 0.38409  
 P 0.25154 2.06900 0.03744  
 P -2.36541 -0.50447 0.10759  
 C 0.30543 0.27569 -4.19790  
 H 0.03076 1.33037 -4.37944  
 H -0.36664 -0.35432 -4.80787  
 H 1.33794 0.11603 -4.55589  
 C 0.23578 -4.37511 -1.78847  
 H 1.23745 -4.52323 -2.22694  
 H -0.51196 -4.53734 -2.58537  
 H 0.08156 -5.13303 -1.00156  
 C 0.43248 -2.14992 1.35244  
 C -0.29620 -3.08348 2.13185  
 H -1.38713 -3.12517 2.07603  
 C 0.36877 -3.96595 3.00780  
 H -0.22279 -4.67570 3.59856  
 C 1.76734 -3.94556 3.15484  
 H 2.25920 -4.62954 3.85470  
 C 2.52929 -3.03680 2.39733  
 H 3.61826 -2.98294 2.51101  
 C 1.85443 -2.19194 1.50501  
 C 3.29019 -1.65420 -1.03626  
 C 3.75393 -2.98297 -0.94416  
 H 3.58654 -3.55509 -0.02674  
 C 4.40949 -3.58277 -2.03274  
 H 4.75503 -4.61881 -1.95066  
 C 4.61895 -2.86158 -3.21846  
 H 5.12866 -3.33180 -4.06587  
 C 4.16829 -1.53424 -3.31511  
 H 4.32736 -0.96447 -4.23672  
 C 3.50222 -0.93573 -2.23420  
 H 3.15208 0.09867 -2.31836  
 C 3.76523 0.10116 1.23090  
 C 3.58888 0.51893 2.56940  
 H 2.65671 0.29227 3.09397  
 C 4.60571 1.22392 3.23087  
 H 4.45430 1.53551 4.26989  
 C 5.80722 1.52632 2.56916  
 H 6.60083 2.07348 3.08935  
 C 5.98624 1.11804 1.23862  
 H 6.92059 1.34394 0.71351  
 C 4.97312 0.41052 0.57171  
 H 5.13241 0.09169 -0.46218

|   |          |          |          |
|---|----------|----------|----------|
| C | 0.14442  | 0.63136  | 2.11519  |
| C | 0.15691  | 0.22994  | 3.47467  |
| H | 0.09173  | -0.83399 | 3.73410  |
| C | 0.23749  | 1.18746  | 4.50537  |
| H | 0.23856  | 0.85483  | 5.55115  |
| C | 0.30634  | 2.56669  | 4.22271  |
| H | 0.35395  | 3.29494  | 5.03961  |
| C | 0.31327  | 3.00230  | 2.88587  |
| H | 0.35285  | 4.07170  | 2.64658  |
| C | 0.25065  | 2.02918  | 1.87216  |
| C | -0.92779 | 3.44060  | -0.47425 |
| C | -2.02125 | 3.76300  | 0.35841  |
| H | -2.15642 | 3.24030  | 1.30977  |
| C | -2.93598 | 4.75766  | -0.02330 |
| H | -3.77498 | 4.99544  | 0.63869  |
| C | -2.77856 | 5.43862  | -1.24045 |
| H | -3.49292 | 6.21463  | -1.53517 |
| C | -1.69450 | 5.12283  | -2.07551 |
| H | -1.55525 | 5.65468  | -3.02304 |
| C | -0.77489 | 4.13247  | -1.69624 |
| H | 0.07758  | 3.91565  | -2.34741 |
| C | 1.87452  | 2.79800  | -0.53899 |
| C | 2.27329  | 2.63374  | -1.88413 |
| H | 1.65324  | 2.04641  | -2.57329 |
| C | 3.46289  | 3.21672  | -2.35236 |
| H | 3.75308  | 3.08906  | -3.40090 |
| C | 4.27702  | 3.95438  | -1.47789 |
| H | 5.20714  | 4.40446  | -1.84062 |
| C | 3.89727  | 4.10362  | -0.13469 |
| H | 4.53453  | 4.66363  | 0.55756  |
| C | 2.70217  | 3.53327  | 0.33282  |
| H | 2.42132  | 3.64433  | 1.38399  |
| C | -3.45256 | 0.62556  | 1.16373  |
| C | -3.11374 | 0.82665  | 2.51996  |
| H | -2.21370 | 0.36088  | 2.92805  |
| C | -3.91014 | 1.63653  | 3.34682  |
| H | -3.62359 | 1.78173  | 4.39376  |
| C | -5.05746 | 2.26102  | 2.83140  |
| H | -5.67674 | 2.89594  | 3.47422  |
| C | -5.40588 | 2.06270  | 1.48583  |
| H | -6.30150 | 2.53977  | 1.07297  |
| C | -4.61229 | 1.25121  | 0.65831  |
| H | -4.90160 | 1.10884  | -0.38614 |
| C | -3.16500 | -0.18744 | -1.57639 |
| C | -2.73447 | 0.93379  | -2.31937 |
| H | -1.95506 | 1.58692  | -1.91633 |
| C | -3.32022 | 1.25133  | -3.55503 |
| H | -2.97021 | 2.13106  | -4.10447 |
| C | -4.34258 | 0.44478  | -4.07952 |
| H | -4.79230 | 0.68324  | -5.04910 |
| C | -4.78892 | -0.66481 | -3.34570 |
| H | -5.59440 | -1.29581 | -3.73698 |
| C | -4.21510 | -0.97242 | -2.09983 |
| H | -4.59587 | -1.82737 | -1.53536 |
| C | -3.14496 | -2.16843 | 0.53765  |
| C | -2.91347 | -3.28032 | -0.30304 |
| H | -2.34602 | -3.15919 | -1.23284 |
| C | -3.41669 | -4.54995 | 0.01950  |
| H | -3.22018 | -5.39311 | -0.65067 |
| C | -4.16356 | -4.73376 | 1.19452  |
| H | -4.55297 | -5.72441 | 1.45152  |
| C | -4.41188 | -3.63571 | 2.03203  |
| H | -5.00171 | -3.76294 | 2.94625  |

|   |          |          |         |
|---|----------|----------|---------|
| C | -3.91194 | -2.36296 | 1.70521 |
| H | -4.12151 | -1.51926 | 2.36823 |

## 2\_blyp

BLYP energy = -2731.09924341  
 Enthalpy 0K = -2730.250159  
 Enthalpy 298K = -2730.186417  
 Free energy 298K = -2730.353124  
 Low Freq. = 12.5020 cm<sup>-1</sup>

|    |          |          |          |
|----|----------|----------|----------|
| Ru | 0.03280  | -0.38393 | 0.21044  |
| Zn | 0.13267  | -0.26278 | -2.35142 |
| Zn | 0.08773  | -2.57715 | -1.14539 |
| P  | 2.44718  | -0.86832 | 0.38103  |
| P  | 0.25314  | 2.12781  | 0.02742  |
| P  | -2.41915 | -0.52586 | 0.11759  |
| C  | 0.32963  | 0.31406  | -4.26078 |
| H  | 0.03252  | 1.36469  | -4.41853 |
| H  | -0.31889 | -0.31772 | -4.89157 |
| H  | 1.36875  | 0.18822  | -4.60801 |
| C  | 0.22709  | -4.43212 | -1.85705 |
| H  | 1.22075  | -4.58406 | -2.30853 |
| H  | -0.53267 | -4.60484 | -2.63825 |
| H  | 0.08677  | -5.17899 | -1.05915 |
| C  | 0.46048  | -2.18950 | 1.32906  |
| C  | -0.26817 | -3.13237 | 2.10039  |
| H  | -1.35706 | -3.16066 | 2.06097  |
| C  | 0.39713  | -4.04752 | 2.94491  |
| H  | -0.19429 | -4.76266 | 3.52609  |
| C  | 1.80009  | -4.05137 | 3.06631  |
| H  | 2.29476  | -4.76017 | 3.73608  |
| C  | 2.56055  | -3.12977 | 2.32016  |
| H  | 3.64976  | -3.09666 | 2.41902  |
| C  | 1.88516  | -2.24622 | 1.46108  |
| C  | 3.38742  | -1.63245 | -1.05390 |
| C  | 3.86389  | -2.96177 | -1.00072 |
| H  | 3.68635  | -3.56967 | -0.11205 |
| C  | 4.55127  | -3.51763 | -2.09555 |
| H  | 4.90533  | -4.55076 | -2.04081 |
| C  | 4.78149  | -2.75294 | -3.25203 |
| H  | 5.31504  | -3.18737 | -4.10158 |
| C  | 4.31882  | -1.42592 | -3.31168 |
| H  | 4.49304  | -0.82260 | -4.20678 |
| C  | 3.62119  | -0.87144 | -2.22421 |
| H  | 3.26466  | 0.15913  | -2.28535 |
| C  | 3.81510  | 0.04216  | 1.29847  |
| C  | 3.66273  | 0.31088  | 2.68000  |
| H  | 2.76278  | -0.01266 | 3.20256  |
| C  | 4.66498  | 0.99499  | 3.38856  |
| H  | 4.52965  | 1.18894  | 4.45621  |
| C  | 5.83247  | 1.42477  | 2.73316  |
| H  | 6.61291  | 1.95355  | 3.28731  |
| C  | 5.99053  | 1.16504  | 1.36136  |
| H  | 6.89571  | 1.48945  | 0.84042  |
| C  | 4.99076  | 0.48045  | 0.64799  |
| H  | 5.13941  | 0.28088  | -0.41398 |
| C  | 0.15667  | 0.63821  | 2.11044  |
| C  | 0.16786  | 0.23788  | 3.47215  |
| H  | 0.10344  | -0.82312 | 3.73274  |
| C  | 0.24305  | 1.19327  | 4.50741  |
| H  | 0.24255  | 0.85890  | 5.55081  |
| C  | 0.30800  | 2.57403  | 4.22511  |
| H  | 0.35225  | 3.30202  | 5.04007  |



|   |          |          |          |
|---|----------|----------|----------|
| C | 0.31462  | 3.00860  | 2.88653  |
| H | 0.34949  | 4.07702  | 2.65195  |
| C | 0.25604  | 2.03792  | 1.86540  |
| C | -0.94641 | 3.50827  | -0.45086 |
| C | -2.02360 | 3.83569  | 0.40507  |
| H | -2.13697 | 3.32260  | 1.36063  |
| C | -2.95170 | 4.82727  | 0.03974  |
| H | -3.77377 | 5.06669  | 0.71941  |
| C | -2.82612 | 5.50277  | -1.18605 |
| H | -3.54837 | 6.27382  | -1.46765 |
| C | -1.76014 | 5.18331  | -2.04578 |
| H | -1.64561 | 5.70768  | -2.99878 |
| C | -0.82825 | 4.19571  | -1.68253 |
| H | 0.00307  | 3.97871  | -2.35600 |
| C | 1.87675  | 2.89454  | -0.53398 |
| C | 2.28702  | 2.75051  | -1.88078 |
| H | 1.68460  | 2.16176  | -2.57771 |
| C | 3.46842  | 3.36085  | -2.34096 |
| H | 3.76395  | 3.24632  | -3.38772 |
| C | 4.26582  | 4.11000  | -1.45802 |
| H | 5.18611  | 4.58130  | -1.81351 |
| C | 3.87594  | 4.24270  | -0.11409 |
| H | 4.49558  | 4.81307  | 0.58320  |
| C | 2.68979  | 3.64271  | 0.34538  |
| H | 2.40641  | 3.74668  | 1.39365  |
| C | -3.50177 | 0.59865  | 1.20490  |
| C | -3.15135 | 0.78923  | 2.56207  |
| H | -2.24973 | 0.32619  | 2.95944  |
| C | -3.94583 | 1.58390  | 3.40872  |
| H | -3.64900 | 1.71791  | 4.45249  |
| C | -5.10554 | 2.20589  | 2.91429  |
| H | -5.72189 | 2.82661  | 3.57056  |
| C | -5.46687 | 2.02009  | 1.56865  |
| H | -6.36945 | 2.49323  | 1.17138  |
| C | -4.67503 | 1.22344  | 0.72186  |
| H | -4.98065 | 1.09242  | -0.31621 |
| C | -3.23577 | -0.18510 | -1.56612 |
| C | -2.81165 | 0.94601  | -2.30249 |
| H | -2.02666 | 1.58978  | -1.90715 |
| C | -3.40963 | 1.28090  | -3.53008 |
| H | -3.06336 | 2.16532  | -4.07085 |
| C | -4.44064 | 0.48320  | -4.05591 |
| H | -4.89929 | 0.73507  | -5.01584 |
| C | -4.88148 | -0.63609 | -3.33054 |
| H | -5.69121 | -1.25966 | -3.71998 |
| C | -4.29440 | -0.96125 | -2.09297 |
| H | -4.67440 | -1.82102 | -1.54148 |
| C | -3.19655 | -2.20620 | 0.54009  |
| C | -2.98825 | -3.31069 | -0.32074 |
| H | -2.43639 | -3.18378 | -1.25447 |
| C | -3.49980 | -4.58236 | -0.01069 |
| H | -3.32326 | -5.41442 | -0.69725 |
| C | -4.23082 | -4.77996 | 1.17404  |
| H | -4.62584 | -5.76922 | 1.42000  |
| C | -4.45332 | -3.69221 | 2.03451  |
| H | -5.02787 | -3.82795 | 2.95511  |
| C | -3.94623 | -2.41709 | 1.71942  |
| H | -4.14010 | -1.58883 | 2.40124  |

## 2\_b3lyp

B3LYP energy = -2732.41356713  
 Enthalpy 0K = -2731.537820  
 Enthalpy 298K = -2731.475939

Free energy 298K = -2731.638499  
 Low Freq. = 12.9369 cm<sup>-1</sup>

|    |          |          |          |
|----|----------|----------|----------|
| Ru | 0.03395  | -0.37794 | 0.20277  |
| Zn | 0.12659  | -0.26352 | -2.33609 |
| Zn | 0.08955  | -2.56370 | -1.11049 |
| P  | 2.42287  | -0.84732 | 0.37692  |
| P  | 0.24981  | 2.09696  | 0.03028  |
| P  | -2.40223 | -0.51349 | 0.11930  |
| C  | 0.32484  | 0.37217  | -4.21383 |
| H  | 0.01091  | 1.41528  | -4.34232 |
| H  | -0.30239 | -0.24354 | -4.86996 |
| H  | 1.36063  | 0.28058  | -4.56177 |
| C  | 0.20772  | -4.41089 | -1.81209 |
| H  | 1.19491  | -4.58040 | -2.25585 |
| H  | -0.54350 | -4.58158 | -2.59287 |
| H  | 0.05554  | -5.15075 | -1.01888 |
| C  | 0.46313  | -2.18175 | 1.31239  |
| C  | -0.24718 | -3.13019 | 2.07569  |
| H  | -1.32760 | -3.18749 | 2.02054  |
| C  | 0.42176  | -4.01166 | 2.93571  |
| H  | -0.15698 | -4.73011 | 3.51212  |
| C  | 1.81224  | -3.97905 | 3.07895  |
| H  | 2.30974  | -4.66224 | 3.76165  |
| C  | 2.55545  | -3.05685 | 2.33639  |
| H  | 3.63548  | -2.99693 | 2.44708  |
| C  | 1.87599  | -2.20782 | 1.46244  |
| C  | 3.34170  | -1.62350 | -1.04415 |
| C  | 3.81704  | -2.94120 | -0.97735 |
| H  | 3.65337  | -3.53151 | -0.08248 |
| C  | 4.48381  | -3.51025 | -2.06548 |
| H  | 4.83715  | -4.53546 | -2.00036 |
| C  | 4.69300  | -2.76965 | -3.22912 |
| H  | 5.20986  | -3.21461 | -4.07449 |
| C  | 4.23072  | -1.45363 | -3.30307 |
| H  | 4.38770  | -0.86916 | -4.20518 |
| C  | 3.55485  | -0.88710 | -2.22158 |
| H  | 3.19819  | 0.13572  | -2.29311 |
| C  | 3.77829  | 0.08003  | 1.25826  |
| C  | 3.61620  | 0.40857  | 2.61487  |
| H  | 2.71411  | 0.11743  | 3.13900  |
| C  | 4.60965  | 1.11074  | 3.29747  |
| H  | 4.46642  | 1.35215  | 4.34700  |
| C  | 5.77845  | 1.49873  | 2.63954  |
| H  | 6.55265  | 2.04256  | 3.17373  |
| C  | 5.94720  | 1.17781  | 1.29262  |
| H  | 6.85420  | 1.46958  | 0.77046  |
| C  | 4.95582  | 0.47429  | 0.60603  |
| H  | 5.11177  | 0.22806  | -0.43794 |
| C  | 0.15074  | 0.62328  | 2.09223  |
| C  | 0.16313  | 0.22269  | 3.44376  |
| H  | 0.10855  | -0.83290 | 3.69995  |
| C  | 0.22844  | 1.16970  | 4.47272  |
| H  | 0.22906  | 0.83589  | 5.50878  |
| C  | 0.28308  | 2.54258  | 4.19592  |
| H  | 0.32003  | 3.26370  | 5.00786  |
| C  | 0.29045  | 2.97638  | 2.86859  |
| H  | 0.32075  | 4.03845  | 2.63641  |
| C  | 0.24134  | 2.01328  | 1.85364  |
| C  | -0.94231 | 3.45180  | -0.46489 |
| C  | -2.01807 | 3.77894  | 0.37512  |
| H  | -2.13405 | 3.27744  | 1.32906  |
| C  | -2.94451 | 4.75276  | -0.00380 |

|    |          |          |          |   |          |          |          |
|----|----------|----------|----------|---|----------|----------|----------|
| H  | -3.76777 | 4.99097  | 0.66331  | P | 0.25483  | 2.05815  | 0.04030  |
| C  | -2.81663 | 5.41076  | -1.22714 | P | -2.35714 | -0.49918 | 0.11238  |
| H  | -3.53796 | 6.16846  | -1.51983 | C | 0.28630  | 0.28496  | -4.18427 |
| C  | -1.75058 | 5.09237  | -2.07083 | H | 0.02438  | 1.34467  | -4.35101 |
| H  | -1.63483 | 5.60403  | -3.02241 | H | -0.40029 | -0.32790 | -4.79398 |
| C  | -0.82118 | 4.12238  | -1.69356 | H | 1.31282  | 0.11491  | -4.55239 |
| H  | 0.00991  | 3.90450  | -2.35582 | C | 0.23251  | -4.38563 | -1.74300 |
| C  | 1.86491  | 2.84793  | -0.51792 | H | 1.23010  | -4.54059 | -2.18633 |
| C  | 2.27826  | 2.70779  | -1.85309 | H | -0.52145 | -4.55633 | -2.53103 |
| H  | 1.67731  | 2.13414  | -2.55347 | H | 0.08219  | -5.13232 | -0.94551 |
| C  | 3.46095  | 3.30168  | -2.29968 | C | 0.43336  | -2.14005 | 1.36593  |
| H  | 3.75967  | 3.18987  | -3.33841 | C | -0.29171 | -3.07160 | 2.14829  |
| C  | 4.25614  | 4.03079  | -1.41391 | H | -1.38162 | -3.11932 | 2.09215  |
| H  | 5.17852  | 4.48939  | -1.75884 | C | 0.37601  | -3.94413 | 3.02920  |
| C  | 3.86283  | 4.15989  | -0.08132 | H | -0.21254 | -4.65286 | 3.62269  |
| H  | 4.48208  | 4.71337  | 0.61869  | C | 1.77261  | -3.91574 | 3.17890  |
| C  | 2.67546  | 3.57558  | 0.36413  | H | 2.26571  | -4.59219 | 3.88387  |
| H  | 2.39043  | 3.67341  | 1.40540  | C | 2.53121  | -3.01039 | 2.41713  |
| C  | -3.46654 | 0.60891  | 1.19209  | H | 3.61930  | -2.95108 | 2.53011  |
| C  | -3.11720 | 0.80022  | 2.53863  | C | 1.85366  | -2.17674 | 1.51951  |
| H  | -2.22758 | 0.33010  | 2.93628  | C | 3.25953  | -1.66650 | -1.03734 |
| C  | -3.89487 | 1.60390  | 3.37514  | C | 3.71290  | -2.99648 | -0.93942 |
| H  | -3.59775 | 1.73892  | 4.41124  | H | 3.55827  | -3.55743 | -0.01359 |
| C  | -5.03752 | 2.23453  | 2.88011  | C | 4.33918  | -3.61304 | -2.03374 |
| H  | -5.64146 | 2.86331  | 3.52850  | H | 4.67602  | -4.65082 | -1.94796 |
| C  | -5.39881 | 2.04742  | 1.54522  | C | 4.52955  | -2.90772 | -3.23013 |
| H  | -6.28886 | 2.52771  | 1.14785  | H | 5.01543  | -3.39203 | -4.08252 |
| C  | -4.62282 | 1.24168  | 0.70908  | C | 4.09107  | -1.57835 | -3.33152 |
| H  | -4.92644 | 1.11269  | -0.32267 | H | 4.23545  | -1.02019 | -4.26184 |
| C  | -3.21455 | -0.18968 | -1.54754 | C | 3.45438  | -0.96286 | -2.24499 |
| C  | -2.78688 | 0.91915  | -2.29512 | H | 3.11195  | 0.07295  | -2.33310 |
| H  | -1.99700 | 1.55512  | -1.91542 | C | 3.75300  | 0.12211  | 1.20118  |
| C  | -3.38496 | 1.24356  | -3.51375 | C | 3.58339  | 0.55986  | 2.53231  |
| H  | -3.03365 | 2.11057  | -4.06509 | H | 2.66154  | 0.32685  | 3.07079  |
| C  | -4.42223 | 0.45741  | -4.01717 | C | 4.59272  | 1.29514  | 3.16794  |
| H  | -4.88247 | 0.70100  | -4.97044 | H | 4.44620  | 1.62427  | 4.20150  |
| C  | -4.86762 | -0.63967 | -3.27983 | C | 5.77970  | 1.60636  | 2.48774  |
| H  | -5.68250 | -1.25390 | -3.65306 | H | 6.56758  | 2.17841  | 2.98773  |
| C  | -4.27807 | -0.95462 | -2.05251 | C | 5.95279  | 1.17449  | 1.16559  |
| H  | -4.66004 | -1.79827 | -1.49079 | H | 6.87655  | 1.40715  | 0.62655  |
| C  | -3.15768 | -2.17902 | 0.55090  | C | 4.94702  | 0.43728  | 0.52386  |
| C  | -2.94934 | -3.27645 | -0.30169 | H | 5.10032  | 0.10277  | -0.50540 |
| H  | -2.41697 | -3.14849 | -1.23878 | C | 0.14736  | 0.63554  | 2.11759  |
| C  | -3.43639 | -4.54359 | 0.01873  | C | 0.16351  | 0.23635  | 3.47603  |
| H  | -3.25746 | -5.37178 | -0.66058 | H | 0.10347  | -0.82666 | 3.73785  |
| C  | -4.14474 | -4.74227 | 1.20544  | C | 0.24102  | 1.19556  | 4.50290  |
| H  | -4.52102 | -5.72883 | 1.46024  | H | 0.24480  | 0.86542  | 5.54858  |
| C  | -4.37009 | -3.66057 | 2.05614  | C | 0.30331  | 2.57316  | 4.21825  |
| H  | -4.92842 | -3.79792 | 2.97804  | H | 0.34820  | 3.30214  | 5.03350  |
| C  | -3.88572 | -2.39018 | 1.73073  | C | 0.30816  | 3.00635  | 2.88242  |
| H  | -4.07981 | -1.56573 | 2.40626  | H | 0.34469  | 4.07452  | 2.64023  |
|    |          |          |          | C | 0.24892  | 2.03160  | 1.87289  |
|    |          |          |          | C | -0.92373 | 3.41869  | -0.49035 |
|    |          |          |          | C | -2.01601 | 3.75032  | 0.33691  |
|    |          |          |          | H | -2.14335 | 3.25044  | 1.30080  |
|    |          |          |          | C | -2.94288 | 4.72182  | -0.06816 |
|    |          |          |          | H | -3.78366 | 4.96460  | 0.58875  |
|    |          |          |          | C | -2.79739 | 5.37057  | -1.30223 |
|    |          |          |          | H | -3.52237 | 6.12780  | -1.61610 |
|    |          |          |          | C | -1.71179 | 5.04792  | -2.13006 |
|    |          |          |          | H | -1.58146 | 5.55638  | -3.09070 |
|    |          |          |          | C | -0.78024 | 4.08041  | -1.72817 |
|    |          |          |          | H | 0.07195  | 3.85597  | -2.37615 |
| Ru | 0.02276  | -0.36069 | 0.23777  |   |          |          |          |
| Zn | 0.10153  | -0.24936 | -2.28109 |   |          |          |          |
| Zn | 0.09534  | -2.55316 | -1.02793 |   |          |          |          |
| P  | 2.37616  | -0.83774 | 0.38269  |   |          |          |          |

**2\_pbe**  
PBE energy = -2729.60357164  
Enthalpy 0K = -2728.751126  
Enthalpy 298K = -2728.687837  
Free energy 298K = -2728.852166  
Low Freq. = 13.9864 cm<sup>-1</sup>

|   |          |          |          |   |          |          |          |
|---|----------|----------|----------|---|----------|----------|----------|
| C | 1.87982  | 2.77905  | -0.53346 | H | 1.21405  | -4.52796 | -2.19607 |
| C | 2.28336  | 2.60607  | -1.87409 | H | -0.52587 | -4.54064 | -2.52006 |
| H | 1.66064  | 2.02491  | -2.56497 | H | 0.08835  | -5.11659 | -0.95540 |
| C | 3.48269  | 3.16978  | -2.33559 | C | 0.44172  | -2.14213 | 1.33302  |
| H | 3.77775  | 3.03419  | -3.38107 | C | -0.26380 | -3.08628 | 2.10006  |
| C | 4.30101  | 3.89669  | -1.45878 | H | -1.34316 | -3.16456 | 2.02812  |
| H | 5.24006  | 4.33039  | -1.81599 | C | 0.40673  | -3.93120 | 2.98937  |
| C | 3.91471  | 4.05609  | -0.12043 | H | -0.16819 | -4.64770 | 3.57197  |
| H | 4.55639  | 4.60589  | 0.57476  | C | 1.78956  | -3.86643 | 3.16000  |
| C | 2.70997  | 3.50541  | 0.34056  | H | 2.28484  | -4.52166 | 3.87116  |
| H | 2.42573  | 3.62168  | 1.38960  | C | 2.53002  | -2.95399 | 2.40877  |
| C | -3.43707 | 0.63783  | 1.16288  | H | 3.60702  | -2.86826 | 2.53410  |
| C | -3.09634 | 0.83664  | 2.51715  | C | 1.84950  | -2.14783 | 1.50342  |
| H | -2.20784 | 0.35335  | 2.92816  | C | 3.23946  | -1.64476 | -1.03212 |
| C | -3.87278 | 1.66905  | 3.33728  | C | 3.70940  | -2.95684 | -0.92400 |
| H | -3.58251 | 1.81477  | 4.38247  | H | 3.57014  | -3.50664 | 0.00158  |
| C | -5.00291 | 2.31687  | 2.81697  | C | 4.33268  | -3.57251 | -2.00803 |
| H | -5.60639 | 2.97093  | 3.45419  | H | 4.68236  | -4.59676 | -1.91415 |
| C | -5.35544 | 2.11724  | 1.47437  | C | 4.50181  | -2.88337 | -3.20494 |
| H | -6.23895 | 2.61208  | 1.05839  | H | 4.98462  | -3.36678 | -4.04938 |
| C | -4.58098 | 1.28420  | 0.65293  | C | 4.04472  | -1.57167 | -3.31813 |
| H | -4.87136 | 1.14401  | -0.39098 | H | 4.17082  | -1.02706 | -4.24965 |
| C | -3.15454 | -0.18714 | -1.57001 | C | 3.41234  | -0.95856 | -2.24110 |
| C | -2.72160 | 0.93161  | -2.31161 | H | 3.05588  | 0.06341  | -2.33811 |
| H | -1.94314 | 1.58324  | -1.90675 | C | 3.72475  | 0.14648  | 1.17692  |
| C | -3.30289 | 1.24886  | -3.54731 | C | 3.55967  | 0.58951  | 2.49580  |
| H | -2.95055 | 2.12805  | -4.09517 | H | 2.64636  | 0.36039  | 3.03458  |
| C | -4.32324 | 0.44330  | -4.07270 | C | 4.56241  | 1.32431  | 3.12030  |
| H | -4.77015 | 0.68058  | -5.04294 | H | 4.41945  | 1.65741  | 4.14456  |
| C | -4.77240 | -0.66357 | -3.33937 | C | 5.73914  | 1.62929  | 2.44002  |
| H | -5.57724 | -1.29314 | -3.73197 | H | 6.52227  | 2.20051  | 2.93106  |
| C | -4.20346 | -0.97048 | -2.09301 | C | 5.90846  | 1.19219  | 1.12995  |
| H | -4.58727 | -1.82314 | -1.52811 | H | 6.82407  | 1.42045  | 0.59142  |
| C | -3.13237 | -2.15951 | 0.54763  | C | 4.90858  | 0.45520  | 0.50040  |
| C | -2.89893 | -3.27016 | -0.29117 | H | 5.05946  | 0.11651  | -0.51937 |
| H | -2.34495 | -3.14579 | -1.22792 | C | 0.15108  | 0.61354  | 2.09335  |
| C | -3.38283 | -4.54253 | 0.04215  | C | 0.17612  | 0.20863  | 3.44013  |
| H | -3.18270 | -5.38593 | -0.62560 | H | 0.12848  | -0.84887 | 3.69354  |
| C | -4.11389 | -4.72895 | 1.22465  | C | 0.24798  | 1.15439  | 4.46503  |
| H | -4.48784 | -5.72223 | 1.49080  | H | 0.25876  | 0.81998  | 5.50086  |
| C | -4.36810 | -3.63079 | 2.05763  | C | 0.29680  | 2.52537  | 4.19206  |
| H | -4.94794 | -3.76058 | 2.97688  | H | 0.33767  | 3.24332  | 5.00665  |
| C | -3.88611 | -2.35552 | 1.72126  | C | 0.29468  | 2.96335  | 2.86956  |
| H | -4.09805 | -1.51138 | 2.38215  | H | 0.32278  | 4.02550  | 2.63552  |

## 2\_pbe0

PBE0 energy = -2729.70162679  
 Enthalpy 0K = -2728.819107  
 Enthalpy 298K = -2728.757884  
 Free energy 298K = -2728.917643  
 Low Freq. = 14.6168 cm<sup>-1</sup>

|    |          |          |          |   |          |          |          |
|----|----------|----------|----------|---|----------|----------|----------|
| Ru | 0.02528  | -0.35932 | 0.21915  | H | 1.21405  | -4.52796 | -2.19607 |
| Zn | 0.08822  | -0.24221 | -2.28320 | H | -0.52587 | -4.54064 | -2.52006 |
| Zn | 0.10424  | -2.54489 | -1.02094 | H | 0.08835  | -5.11659 | -0.95540 |
| P  | 2.36248  | -0.81764 | 0.37421  | C | 0.44172  | -2.14213 | 1.33302  |
| P  | 0.24773  | 2.04024  | 0.04279  | C | -0.26380 | -3.08628 | 2.10006  |
| P  | -2.34570 | -0.49413 | 0.11466  | H | -1.34316 | -3.16456 | 2.02812  |
| C  | 0.26896  | 0.36497  | -4.15840 | C | 0.40673  | -3.93120 | 2.98937  |
| H  | -0.01675 | 1.41609  | -4.29023 | H | -0.16819 | -4.64770 | 3.57197  |
| H  | -0.39242 | -0.23389 | -4.79610 | C | 1.78956  | -3.86643 | 3.16000  |
| H  | 1.29243  | 0.23948  | -4.53197 | H | 2.28484  | -4.52166 | 3.87116  |
| C  | 0.22923  | -4.36869 | -1.74342 | C | 2.53002  | -2.95399 | 2.40877  |
|    |          |          |          | H | 3.60702  | -2.86826 | 2.53410  |
|    |          |          |          | C | 1.84950  | -2.14783 | 1.50342  |
|    |          |          |          | C | 3.23946  | -1.64476 | -1.03212 |
|    |          |          |          | C | 3.70940  | -2.95684 | -0.92400 |
|    |          |          |          | H | 3.57014  | -3.50664 | 0.00158  |
|    |          |          |          | C | 4.33268  | -3.57251 | -2.00803 |
|    |          |          |          | H | 4.68236  | -4.59676 | -1.91415 |
|    |          |          |          | C | 4.50181  | -2.88337 | -3.20494 |
|    |          |          |          | H | 4.98462  | -3.36678 | -4.04938 |
|    |          |          |          | C | 4.04472  | -1.57167 | -3.31813 |
|    |          |          |          | H | 4.17082  | -1.02706 | -4.24965 |
|    |          |          |          | C | 3.41234  | -0.95856 | -2.24110 |
|    |          |          |          | H | 3.05588  | 0.06341  | -2.33811 |
|    |          |          |          | C | 3.72475  | 0.14648  | 1.17692  |
|    |          |          |          | C | 3.55967  | 0.58951  | 2.49580  |
|    |          |          |          | H | 2.64636  | 0.36039  | 3.03458  |
|    |          |          |          | C | 4.56241  | 1.32431  | 3.12030  |
|    |          |          |          | H | 4.41945  | 1.65741  | 4.14456  |
|    |          |          |          | C | 5.73914  | 1.62929  | 2.44002  |
|    |          |          |          | H | 6.52227  | 2.20051  | 2.93106  |
|    |          |          |          | C | 5.90846  | 1.19219  | 1.12995  |
|    |          |          |          | H | 6.82407  | 1.42045  | 0.59142  |
|    |          |          |          | C | 4.90858  | 0.45520  | 0.50040  |
|    |          |          |          | H | 5.05946  | 0.11651  | -0.51937 |
|    |          |          |          | C | 0.15108  | 0.61354  | 2.09335  |
|    |          |          |          | C | 0.17612  | 0.20863  | 3.44013  |
|    |          |          |          | H | 0.12848  | -0.84887 | 3.69354  |
|    |          |          |          | C | 0.24798  | 1.15439  | 4.46503  |
|    |          |          |          | H | 0.25876  | 0.81998  | 5.50086  |
|    |          |          |          | C | 0.29680  | 2.52537  | 4.19206  |
|    |          |          |          | H | 0.33767  | 3.24332  | 5.00665  |
|    |          |          |          | C | 0.29468  | 2.96335  | 2.86956  |
|    |          |          |          | H | 0.32278  | 4.02550  | 2.63552  |
|    |          |          |          | C | 0.24103  | 2.00109  | 1.86088  |
|    |          |          |          | C | -0.92973 | 3.38144  | -0.48116 |
|    |          |          |          | C | -2.01595 | 3.70287  | 0.34010  |
|    |          |          |          | H | -2.14248 | 3.20161  | 1.29468  |
|    |          |          |          | C | -2.93985 | 4.66573  | -0.05863 |
|    |          |          |          | H | -3.77627 | 4.90070  | 0.59324  |
|    |          |          |          | C | -2.79592 | 5.31590  | -1.28047 |
|    |          |          |          | H | -3.51799 | 6.06649  | -1.58936 |
|    |          |          |          | C | -1.71597 | 5.00356  | -2.10277 |
|    |          |          |          | H | -1.58778 | 5.51304  | -3.05395 |
|    |          |          |          | C | -0.78817 | 4.04484  | -1.70648 |
|    |          |          |          | H | 0.05849  | 3.82797  | -2.35075 |
|    |          |          |          | C | 1.85890  | 2.76034  | -0.52116 |
|    |          |          |          | C | 2.26311  | 2.59584  | -1.85159 |
|    |          |          |          | H | 1.64723  | 2.02390  | -2.54363 |
|    |          |          |          | C | 3.45353  | 3.15966  | -2.30498 |
|    |          |          |          | H | 3.74902  | 3.03029  | -3.34271 |
|    |          |          |          | C | 4.26189  | 3.88009  | -1.42965 |
|    |          |          |          | H | 5.19370  | 4.31469  | -1.78037 |

|   |          |          |          |   |          |          |          |
|---|----------|----------|----------|---|----------|----------|----------|
| C | 3.87503  | 4.03206  | -0.10123 | H | -0.14517 | -4.66202 | 3.64641  |
| H | 4.50904  | 4.57655  | 0.59248  | C | 1.82147  | -3.86720 | 3.22475  |
| C | 2.67970  | 3.47931  | 0.35128  | H | 2.32446  | -4.52024 | 3.94002  |
| H | 2.39665  | 3.58843  | 1.39302  | C | 2.56264  | -2.94636 | 2.46140  |
| C | -3.40898 | 0.62332  | 1.17238  | H | 3.64488  | -2.85581 | 2.57569  |
| C | -3.06088 | 0.81339  | 2.51522  | C | 1.86634  | -2.14221 | 1.55346  |
| H | -2.17633 | 0.33098  | 2.91440  | C | 3.14632  | -1.65430 | -1.05739 |
| C | -3.82563 | 1.63377  | 3.34108  | C | 3.35481  | -3.04751 | -1.05780 |
| H | -3.52916 | 1.77236  | 4.37702  | H | 3.14283  | -3.62722 | -0.16008 |
| C | -4.95238 | 2.27875  | 2.83714  | C | 3.80582  | -3.69245 | -2.22156 |
| H | -5.54719 | 2.92343  | 3.47846  | H | 3.94876  | -4.77402 | -2.21468 |
| C | -5.31279 | 2.08842  | 1.50590  | C | 4.06191  | -2.95438 | -3.38681 |
| H | -6.19330 | 2.58160  | 1.10290  | H | 4.40526  | -3.45906 | -4.29096 |
| C | -4.54916 | 1.26726  | 0.67937  | C | 3.87119  | -1.56157 | -3.38605 |
| H | -4.84501 | 1.13689  | -0.35591 | H | 4.06668  | -0.97970 | -4.28808 |
| C | -3.15289 | -0.18084 | -1.54353 | C | 3.41003  | -0.91534 | -2.23134 |
| C | -2.72440 | 0.92285  | -2.28994 | H | 3.24869  | 0.16170  | -2.24034 |
| H | -1.93751 | 1.56254  | -1.90398 | C | 3.71085  | 0.20672  | 1.15794  |
| C | -3.31822 | 1.24118  | -3.50796 | C | 3.49759  | 0.75918  | 2.43983  |
| H | -2.96662 | 2.10690  | -4.06154 | H | 2.56614  | 0.56938  | 2.96741  |
| C | -4.35049 | 0.45274  | -4.00825 | C | 4.48425  | 1.55644  | 3.03498  |
| H | -4.80865 | 0.69118  | -4.96389 | H | 4.30563  | 1.97616  | 4.02632  |
| C | -4.79658 | -0.63904 | -3.26935 | C | 5.68920  | 1.81534  | 2.36105  |
| H | -5.61007 | -1.25491 | -3.64301 | H | 6.45610  | 2.43706  | 2.82632  |
| C | -4.21193 | -0.94801 | -2.04245 | C | 5.90300  | 1.26844  | 1.08702  |
| H | -4.59203 | -1.78929 | -1.47323 | H | 6.83547  | 1.46408  | 0.55509  |
| C | -3.09447 | -2.14942 | 0.54196  | C | 4.92023  | 0.46751  | 0.48589  |
| C | -2.86380 | -3.24208 | -0.30380 | H | 5.09833  | 0.04795  | -0.50288 |
| H | -2.33357 | -3.10512 | -1.24319 | C | 0.11300  | 0.60885  | 2.11436  |
| C | -3.32442 | -4.51328 | 0.02333  | C | 0.14158  | 0.18880  | 3.46306  |
| H | -3.12478 | -5.34297 | -0.64855 | H | 0.11798  | -0.87528 | 3.70595  |
| C | -4.03130 | -4.71566 | 1.20638  | C | 0.18524  | 1.14278  | 4.49784  |
| H | -4.38727 | -5.70799 | 1.46802  | H | 0.19620  | 0.80759  | 5.53848  |
| C | -4.28529 | -3.63497 | 2.04502  | C | 0.20814  | 2.52624  | 4.22339  |
| H | -4.84686 | -3.77776 | 2.96415  | H | 0.23000  | 3.24585  | 5.04377  |
| C | -3.82483 | -2.36084 | 1.71482  | C | 0.20983  | 2.97413  | 2.89062  |
| H | -4.03530 | -1.53095 | 2.38099  | H | 0.23015  | 4.04045  | 2.65528  |

## 2\_b97d

B97D energy = -2732.21063623  
 Enthalpy 0K = -2731.354504  
 Enthalpy 298K = -2731.292422  
 Free energy 298K = -2731.451534  
 Low Freq. = 17.1341 cm<sup>-1</sup>

|    |          |          |          |   |          |         |          |
|----|----------|----------|----------|---|----------|---------|----------|
| Ru | 0.01467  | -0.38309 | 0.24056  | C | -0.92855 | 3.34432 | -0.56950 |
| Zn | 0.21002  | -0.30646 | -2.29038 | C | -2.01586 | 3.75068 | 0.22812  |
| Zn | 0.02014  | -2.61099 | -1.02481 | H | -2.14204 | 3.34123 | 1.22878  |
| P  | 2.35895  | -0.81135 | 0.39901  | C | -2.94688 | 4.67504 | -0.27053 |
| P  | 0.22712  | 2.01774  | 0.04747  | H | -3.78483 | 4.97564 | 0.35887  |
| P  | -2.33119 | -0.46365 | 0.14163  | C | -2.81032 | 5.19228 | -1.56727 |
| C  | 0.45283  | 0.39910  | -4.15376 | H | -3.53986 | 5.90601 | -1.95335 |
| H  | 0.09382  | 1.43956  | -4.23138 | C | -1.72647 | 4.79037 | -2.36644 |
| H  | -0.13169 | -0.21093 | -4.86235 | H | -1.60684 | 5.19366 | -3.37359 |
| H  | 1.51004  | 0.36906  | -4.46331 | C | -0.78872 | 3.87417 | -1.87062 |
| C  | 0.04261  | -4.51459 | -1.61316 | H | 0.05479  | 3.57742 | -2.49338 |
| H  | 0.87740  | -4.68615 | -2.31088 | C | 1.88433  | 2.68915 | -0.47065 |
| H  | -0.89681 | -4.78080 | -2.12585 | C | 2.32623  | 2.50067 | -1.79590 |
| H  | 0.16512  | -5.18193 | -0.74467 | H | 1.70386  | 1.96152 | -2.51104 |
| C  | 0.45000  | -2.15576 | 1.37831  | C | 3.57642  | 2.99092 | -2.20426 |
| C  | -0.25716 | -3.10070 | 2.15570  | H | 3.90452  | 2.83950 | -3.23424 |
| H  | -1.33691 | -3.19089 | 2.08349  | C | 4.40200  | 3.66130 | -1.28824 |
| C  | 0.42693  | -3.94172 | 3.05654  | H | 5.37959  | 4.03155 | -1.60084 |
|    |          |          |          | C | 3.97066  | 3.84080 | 0.03499  |
|    |          |          |          | H | 4.61628  | 4.33825 | 0.75890  |
|    |          |          |          | C | 2.71726  | 3.36109 | 0.44296  |
|    |          |          |          | H | 2.39888  | 3.48226 | 1.47664  |
|    |          |          |          | C | -3.34943 | 0.80621 | 1.09144  |
|    |          |          |          | C | -3.02212 | 1.08245 | 2.43558  |
|    |          |          |          | H | -2.20630 | 0.55248 | 2.91533  |

|   |          |          |          |   |         |          |          |
|---|----------|----------|----------|---|---------|----------|----------|
| C | -3.73053 | 2.05055  | 3.16268  | C | 3.48710 | -3.03894 | -1.01397 |
| H | -3.44545 | 2.25593  | 4.19542  | H | 3.30135 | -3.61032 | -0.10666 |
| C | -4.78578 | 2.75384  | 2.56000  | C | 3.99351 | -3.67716 | -2.15560 |
| H | -5.33357 | 3.51247  | 3.12174  | H | 4.21111 | -4.74473 | -2.12166 |
| C | -5.13382 | 2.46912  | 1.23084  | C | 4.20711 | -2.95281 | -3.33507 |
| H | -5.95583 | 3.00393  | 0.75206  | H | 4.59250 | -3.45384 | -4.22294 |
| C | -4.42115 | 1.50573  | 0.50062  | C | 3.91927 | -1.57952 | -3.37115 |
| H | -4.69723 | 1.31428  | -0.53427 | H | 4.08225 | -1.00796 | -4.28505 |
| C | -3.09669 | -0.25899 | -1.56330 | C | 3.40491 | -0.94111 | -2.23783 |
| C | -2.63434 | 0.80953  | -2.35869 | H | 3.17370 | 0.12131  | -2.27096 |
| H | -1.85494 | 1.46552  | -1.98143 | C | 3.69593 | 0.17037  | 1.16688  |
| C | -3.18373 | 1.06001  | -3.62299 | C | 3.48566 | 0.68283  | 2.46327  |
| H | -2.80538 | 1.89537  | -4.21308 | H | 2.56028 | 0.46472  | 2.98840  |
| C | -4.20848 | 0.23799  | -4.11865 | C | 4.46376 | 1.47614  | 3.07186  |
| H | -4.63056 | 0.42016  | -5.10817 | H | 4.28641 | 1.86728  | 4.07399  |
| C | -4.69452 | -0.81293 | -3.32580 | C | 5.65892 | 1.76762  | 2.39847  |
| H | -5.50307 | -1.44747 | -3.69299 | H | 6.41992 | 2.38669  | 2.87435  |
| C | -4.15537 | -1.05084 | -2.04988 | C | 5.87049 | 1.25840  | 1.11104  |
| H | -4.56827 | -1.85043 | -1.43789 | H | 6.79513 | 1.48173  | 0.57840  |
| C | -3.10610 | -2.06501 | 0.72641  | C | 4.89493 | 0.46425  | 0.49498  |
| C | -2.94840 | -3.23054 | -0.05333 | H | 5.06961 | 0.07735  | -0.50638 |
| H | -2.52077 | -3.16704 | -1.05330 | C | 0.12760 | 0.57806  | 2.12944  |
| C | -3.34898 | -4.48260 | 0.43234  | C | 0.14632 | 0.17792  | 3.48157  |
| H | -3.20300 | -5.36889 | -0.18630 | H | 0.11374 | -0.88148 | 3.73908  |
| C | -3.92407 | -4.58995 | 1.70885  | C | 0.18844 | 1.14324  | 4.50436  |
| H | -4.22740 | -5.56433 | 2.09460  | H | 0.19248 | 0.82015  | 5.54770  |
| C | -4.11416 | -3.43318 | 2.48035  | C | 0.21438 | 2.51984  | 4.21269  |
| H | -4.57363 | -3.50249 | 3.46778  | H | 0.23074 | 3.25013  | 5.02226  |
| C | -3.71214 | -2.17879 | 1.99254  | C | 0.22586 | 2.94902  | 2.87540  |
| H | -3.86047 | -1.29351 | 2.60813  | H | 0.24430 | 4.01155  | 2.62773  |

## 2\_b97d3

B97D3 energy = -2732.46637208  
 Enthalpy 0K = -2731.606664  
 Enthalpy 298K = -2731.544419  
 Free energy 298K = -2731.704609  
 Low Freq. = 16.1221 cm<sup>-1</sup>

|    |          |          |          |   |          |         |          |
|----|----------|----------|----------|---|----------|---------|----------|
| Ru | 0.01661  | -0.39001 | 0.23457  | C | -0.89211 | 3.33885 | -0.55342 |
| Zn | 0.10289  | -0.20023 | -2.27818 | C | -2.00398 | 3.69599 | 0.23123  |
| Zn | 0.05496  | -2.53503 | -1.12055 | H | -2.12940 | 3.26896 | 1.22283  |
| P  | 2.35133  | -0.83406 | 0.38394  | C | -2.96085 | 4.58759 | -0.27039 |
| P  | 0.26184  | 2.00781  | 0.03984  | H | -3.81941 | 4.84711 | 0.34773  |
| P  | -2.33132 | -0.47685 | 0.14961  | C | -2.82381 | 5.12522 | -1.55646 |
| C  | 0.28438  | 0.51574  | -4.13204 | H | -3.57526 | 5.81157 | -1.94700 |
| H  | -0.00519 | 1.57622  | -4.18210 | C | -1.71092 | 4.78125 | -2.33823 |
| H  | -0.38596 | -0.04523 | -4.79995 | H | -1.58957 | 5.20357 | -3.33622 |
| H  | 1.31288  | 0.41244  | -4.50857 | C | -0.74819 | 3.89603 | -1.84015 |
| C  | 0.15397  | -4.41329 | -1.74855 | H | 0.11318  | 3.63848 | -2.45318 |
| H  | 1.04468  | -4.55054 | -2.37695 | C | 1.91865  | 2.68611 | -0.45623 |
| H  | -0.73288 | -4.68483 | -2.34059 | C | 2.37434  | 2.50289 | -1.77539 |
| H  | 0.22072  | -5.09438 | -0.88783 | H | 1.75768  | 1.96649 | -2.49593 |
| C  | 0.43012  | -2.15781 | 1.37259  | C | 3.62446  | 2.99756 | -2.16965 |
| C  | -0.28544 | -3.08332 | 2.16067  | H | 3.96396  | 2.84842 | -3.19514 |
| H  | -1.36778 | -3.14207 | 2.10540  | C | 4.43596  | 3.66941 | -1.24595 |
| C  | 0.39367  | -3.93205 | 3.05428  | H | 5.41447  | 4.04339 | -1.54724 |
| H  | -0.18284 | -4.63857 | 3.65477  | C | 3.99086  | 3.84419 | 0.07091  |
| C  | 1.78891  | -3.87958 | 3.20659  | H | 4.62688  | 4.34189 | 0.80170  |
| H  | 2.28850  | -4.53653 | 3.91901  | C | 2.73878  | 3.35754 | 0.46596  |
| C  | 2.53537  | -2.97271 | 2.43545  | H | 2.41378  | 3.47075 | 1.49700  |
| H  | 3.61822  | -2.89468 | 2.54340  | C | -3.35592 | 0.74599 | 1.13659  |
| C  | 1.84653  | -2.16401 | 1.52925  | C | -3.00013 | 1.01107 | 2.47285  |
| C  | 3.18198  | -1.66705 | -1.05025 | H | -2.15171 | 0.50100 | 2.91513  |
|    |          |          |          | C | -3.71399 | 1.94783 | 3.23026  |
|    |          |          |          | H | -3.40579 | 2.15050 | 4.25585  |
|    |          |          |          | C | -4.80319 | 2.62655 | 2.66571  |
|    |          |          |          | H | -5.35498 | 3.36304 | 3.25047  |
|    |          |          |          | C | -5.18157 | 2.34679 | 1.34569  |
|    |          |          |          | H | -6.03284 | 2.86158 | 0.89915  |
|    |          |          |          | C | -4.46367 | 1.41475 | 0.58477  |

|   |          |          |          |
|---|----------|----------|----------|
| H | -4.76110 | 1.22239  | -0.44287 |
| C | -3.10578 | -0.21608 | -1.54002 |
| C | -2.71682 | 0.93153  | -2.25977 |
| H | -2.01238 | 1.63110  | -1.82196 |
| C | -3.25660 | 1.20778  | -3.51997 |
| H | -2.93891 | 2.10570  | -4.04899 |
| C | -4.19013 | 0.33153  | -4.09126 |
| H | -4.60222 | 0.53460  | -5.07974 |
| C | -4.59853 | -0.80150 | -3.37576 |
| H | -5.33693 | -1.48097 | -3.80262 |
| C | -4.07278 | -1.06767 | -2.10216 |
| H | -4.42502 | -1.93547 | -1.55021 |
| C | -3.11312 | -2.08961 | 0.67990  |
| C | -2.88382 | -3.24845 | -0.08763 |
| H | -2.35718 | -3.17871 | -1.03801 |
| C | -3.32078 | -4.50195 | 0.35249  |
| H | -3.11916 | -5.38357 | -0.25545 |
| C | -3.99956 | -4.61822 | 1.57398  |
| H | -4.33121 | -5.59477 | 1.92656  |
| C | -4.25218 | -3.46955 | 2.33507  |
| H | -4.78805 | -3.54736 | 3.28143  |
| C | -3.81725 | -2.21238 | 1.89030  |
| H | -4.01626 | -1.33065 | 2.49505  |

## 2\_m06

M06 energy = -2730.74326942  
Enthalpy 0K = -2729.871249  
Enthalpy 298K = -2729.810160  
Free energy 298K = -2729.967270  
Low Freq. = 18.8759 cm<sup>-1</sup>

|    |          |          |          |
|----|----------|----------|----------|
| Ru | 0.02971  | -0.35714 | 0.20351  |
| Zn | 0.04757  | -0.24433 | -2.31617 |
| Zn | 0.20175  | -2.53220 | -1.07733 |
| P  | 2.38392  | -0.78364 | 0.37894  |
| P  | 0.22637  | 2.06344  | 0.01152  |
| P  | -2.36183 | -0.52588 | 0.13817  |
| C  | 0.14772  | 0.48630  | -4.15193 |
| H  | -0.14964 | 1.54478  | -4.17436 |
| H  | -0.54000 | -0.06457 | -4.80570 |
| H  | 1.15853  | 0.40338  | -4.57376 |
| C  | 0.53231  | -4.38769 | -1.61903 |
| H  | 1.42796  | -4.44325 | -2.25014 |
| H  | -0.31205 | -4.80431 | -2.18171 |
| H  | 0.69477  | -5.00348 | -0.72445 |
| C  | 0.46988  | -2.13293 | 1.32871  |
| C  | -0.23059 | -3.09117 | 2.07822  |
| H  | -1.30967 | -3.19782 | 1.97671  |
| C  | 0.44086  | -3.91886 | 2.98102  |
| H  | -0.12784 | -4.65112 | 3.55269  |
| C  | 1.81799  | -3.82111 | 3.17906  |
| H  | 2.31383  | -4.46539 | 3.90176  |
| C  | 2.55198  | -2.89475 | 2.44042  |
| H  | 3.62816  | -2.78597 | 2.58165  |
| C  | 1.87258  | -2.10452 | 1.52170  |
| C  | 3.25073  | -1.63555 | -1.01686 |
| C  | 3.82349  | -2.89753 | -0.85006 |
| H  | 3.78610  | -3.38515 | 0.12252  |
| C  | 4.40277  | -3.55441 | -1.93279 |
| H  | 4.83184  | -4.54420 | -1.79477 |
| C  | 4.41756  | -2.95617 | -3.18807 |
| H  | 4.85950  | -3.47649 | -4.03464 |
| C  | 3.86104  | -1.69064 | -3.36066 |

|   |          |          |          |
|---|----------|----------|----------|
| H | 3.86798  | -1.21576 | -4.33939 |
| C | 3.28219  | -1.03528 | -2.28033 |
| H | 2.84517  | -0.04574 | -2.41928 |
| C | 3.72414  | 0.22910  | 1.14752  |
| C | 3.56938  | 0.68977  | 2.46077  |
| H | 2.68371  | 0.41703  | 3.03148  |
| C | 4.53828  | 1.50288  | 3.03689  |
| H | 4.40246  | 1.85359  | 4.05791  |
| C | 5.67122  | 1.86501  | 2.31270  |
| H | 6.43009  | 2.49923  | 2.76613  |
| C | 5.82939  | 1.41175  | 1.00747  |
| H | 6.70948  | 1.69304  | 0.43270  |
| C | 4.86099  | 0.59954  | 0.42569  |
| H | 4.99384  | 0.25643  | -0.59890 |
| C | 0.15952  | 0.64221  | 2.08146  |
| C | 0.21550  | 0.25220  | 3.42960  |
| H | 0.19494  | -0.80754 | 3.69564  |
| C | 0.28758  | 1.20811  | 4.44196  |
| H | 0.32382  | 0.88504  | 5.48238  |
| C | 0.30821  | 2.57628  | 4.15347  |
| H | 0.35001  | 3.30433  | 4.96083  |
| C | 0.27483  | 2.99819  | 2.82773  |
| H | 0.28247  | 4.05998  | 2.57628  |
| C | 0.22181  | 2.02529  | 1.82977  |
| C | -0.97938 | 3.36237  | -0.52993 |
| C | -2.10493 | 3.62335  | 0.25662  |
| H | -2.21697 | 3.13898  | 1.22689  |
| C | -3.09315 | 4.49070  | -0.19920 |
| H | -3.96446 | 4.68130  | 0.42451  |
| C | -2.97088 | 5.10396  | -1.44156 |
| H | -3.74621 | 5.77913  | -1.79646 |
| C | -1.84813 | 4.85526  | -2.22669 |
| H | -1.73991 | 5.33872  | -3.19534 |
| C | -0.85813 | 3.99027  | -1.77439 |
| H | 0.01869  | 3.80710  | -2.39453 |
| C | 1.83842  | 2.77785  | -0.54980 |
| C | 2.26258  | 2.56971  | -1.86676 |
| H | 1.64136  | 1.99221  | -2.55490 |
| C | 3.47583  | 3.08745  | -2.30983 |
| H | 3.79088  | 2.91856  | -3.33762 |
| C | 4.28312  | 3.81094  | -1.43710 |
| H | 5.23626  | 4.20887  | -1.77849 |
| C | 3.87221  | 4.01375  | -0.12355 |
| H | 4.50750  | 4.56166  | 0.56912  |
| C | 2.65568  | 3.50313  | 0.31881  |
| H | 2.35356  | 3.64676  | 1.35452  |
| C | -3.34565 | 0.48055  | 1.35898  |
| C | -2.97068 | 0.42133  | 2.70609  |
| H | -2.15933 | -0.23772 | 3.00643  |
| C | -3.60612 | 1.20830  | 3.65913  |
| H | -3.28223 | 1.15968  | 4.69676  |
| C | -4.63902 | 2.06183  | 3.27944  |
| H | -5.13529 | 2.68345  | 4.02145  |
| C | -5.03499 | 2.11263  | 1.94727  |
| H | -5.84726 | 2.77030  | 1.64338  |
| C | -4.39079 | 1.33145  | 0.99036  |
| H | -4.69933 | 1.40412  | -0.05106 |
| C | -3.26319 | -0.07782 | -1.43275 |
| C | -2.78587 | 0.97192  | -2.21948 |
| H | -1.86961 | 1.48571  | -1.93815 |
| C | -3.47818 | 1.39600  | -3.34955 |
| H | -3.08005 | 2.21781  | -3.94179 |
| C | -4.66535 | 0.76891  | -3.71081 |

H -5.20809 1.09173 -4.59637  
 C -5.15834 -0.27311 -2.93022  
 H -6.09013 -0.76445 -3.20193  
 C -4.46726 -0.69020 -1.79698  
 H -4.87583 -1.49354 -1.18653  
 C -3.05768 -2.23310 0.41450  
 C -2.76976 -3.22660 -0.52828  
 H -2.23447 -2.96979 -1.44381  
 C -3.17271 -4.54098 -0.32895  
 H -2.92587 -5.29718 -1.07073  
 C -3.88895 -4.88242 0.81566  
 H -4.20062 -5.91146 0.97860  
 C -4.21428 -3.89746 1.74061  
 H -4.79047 -4.15034 2.62799  
 C -3.80490 -2.57994 1.54081  
 H -4.06686 -1.82273 2.27638

## 2\_tpss

TPSS energy = -2732.64968804  
 Enthalpy 0K = -2731.787454  
 Enthalpy 298K = -2731.724428  
 Free energy 298K = -2731.889586  
 Low Freq. = 13.0500 cm<sup>-1</sup>

Ru 0.02287 -0.34969 0.23467  
 Zn 0.07066 -0.27844 -2.27607  
 Zn 0.14182 -2.54453 -1.00256  
 P 2.38627 -0.81009 0.38684  
 P 0.23027 2.08006 0.03057  
 P -2.36130 -0.51508 0.11499  
 C 0.23353 0.24130 -4.19301  
 H -0.02143 1.29710 -4.36944  
 H -0.45975 -0.37013 -4.78931  
 H 1.25015 0.06460 -4.57410  
 C 0.31621 -4.37811 -1.72351  
 H 1.31011 -4.51395 -2.17100  
 H -0.43434 -4.56427 -2.50595  
 H 0.18545 -5.12906 -0.93219  
 C 0.44646 -2.13451 1.36510  
 C -0.26894 -3.07614 2.14350  
 H -1.35149 -3.14488 2.07423  
 C 0.40393 -3.93023 3.03634  
 H -0.17445 -4.64345 3.62450  
 C 1.79696 -3.87383 3.20135  
 H 2.29214 -4.53315 3.91291  
 C 2.54676 -2.96112 2.44213  
 H 3.62671 -2.88342 2.56757  
 C 1.86583 -2.14503 1.53103  
 C 3.27170 -1.65400 -1.02493  
 C 3.80274 -2.95064 -0.88667  
 H 3.69715 -3.48146 0.05695  
 C 4.44437 -3.57152 -1.96792  
 H 4.84010 -4.57929 -1.85114  
 C 4.57204 -2.90338 -3.19271  
 H 5.06826 -3.38920 -4.03127  
 C 4.05337 -1.60851 -3.33677  
 H 4.14627 -1.08326 -4.28608  
 C 3.40196 -0.98999 -2.26197  
 H 2.99793 0.01417 -2.38080  
 C 3.77148 0.14813 1.19559  
 C 3.61761 0.58567 2.52756  
 H 2.70279 0.36038 3.07004  
 C 4.63884 1.30917 3.15563

H 4.50617 1.63604 4.18603  
 C 5.82187 1.60963 2.46599  
 H 6.61592 2.16971 2.95799  
 C 5.97874 1.18094 1.14180  
 H 6.89527 1.40569 0.59795  
 C 4.96094 0.45541 0.50803  
 H 5.10016 0.12374 -0.51842  
 C 0.15872 0.65758 2.11704  
 C 0.19210 0.26650 3.47719  
 H 0.13935 -0.78970 3.74475  
 C 0.27999 1.23045 4.49703  
 H 0.29780 0.90817 5.53946  
 C 0.33514 2.60579 4.20418  
 H 0.38824 3.33547 5.01129  
 C 0.32132 3.03169 2.86777  
 H 0.35073 4.09376 2.62266  
 C 0.25250 2.05209 1.86333  
 C -0.96337 3.44076 -0.47257  
 C -2.05556 3.74602 0.36380  
 H -2.18027 3.22022 1.30767  
 C -2.98115 4.72996 -0.00930  
 H -3.81641 4.95415 0.65210  
 C -2.83501 5.41723 -1.22123  
 H -3.55510 6.18195 -1.50845  
 C -1.75171 5.11941 -2.05930  
 H -1.62257 5.65481 -2.99911  
 C -0.82146 4.13950 -1.68885  
 H 0.02549 3.93487 -2.34099  
 C 1.83881 2.81197 -0.57571  
 C 2.22523 2.61516 -1.91688  
 H 1.60358 2.01091 -2.57982  
 C 3.40394 3.19158 -2.41133  
 H 3.68423 3.03772 -3.45260  
 C 4.21865 3.95705 -1.56623  
 H 5.13748 4.40027 -1.94711  
 C 3.85041 4.14119 -0.22686  
 H 4.48688 4.72091 0.43977  
 C 2.66656 3.57633 0.26656  
 H 2.39702 3.71331 1.31114  
 C -3.45925 0.57348 1.19722  
 C -3.10802 0.75597 2.55010  
 H -2.20417 0.29414 2.93712  
 C -3.90079 1.54421 3.39621  
 H -3.60618 1.67616 4.43626  
 C -5.05615 2.16547 2.90263  
 H -5.67009 2.78237 3.55747  
 C -5.41642 1.98618 1.56022  
 H -6.31443 2.46100 1.16671  
 C -4.62654 1.19623 0.71313  
 H -4.92195 1.07068 -0.32554  
 C -3.16652 -0.18466 -1.55891  
 C -2.72254 0.92385 -2.30713  
 H -1.92884 1.55540 -1.91324  
 C -3.31324 1.24994 -3.53529  
 H -2.95369 2.11564 -4.08847  
 C -4.35431 0.46331 -4.04511  
 H -4.80699 0.70669 -5.00503  
 C -4.81323 -0.63502 -3.30647  
 H -5.62925 -1.24782 -3.68729  
 C -4.23390 -0.95119 -2.06879  
 H -4.62038 -1.79435 -1.50182  
 C -3.10348 -2.20079 0.50519  
 C -2.84252 -3.28134 -0.36268

H -2.28908 -3.11643 -1.28760  
 C -3.30696 -4.57014 -0.07160  
 H -3.08810 -5.38636 -0.75779  
 C -4.04596 -4.80245 1.09664  
 H -4.40420 -5.80415 1.32852  
 C -4.32712 -3.73465 1.95831  
 H -4.91096 -3.90070 2.86267  
 C -3.86385 -2.44298 1.66477  
 H -4.09503 -1.62594 2.34397

**2\_wb97xd**

wB97XD energy = -2731.80737552  
 Enthalpy 0K = -2730.919032  
 Enthalpy 298K = -2730.859030  
 Free energy 298K = -2731.014221  
 Low Freq. = 17.1393 cm-1

Ru 0.03390 -0.37533 0.21222  
 Zn 0.09112 -0.21779 -2.28367  
 Zn 0.08409 -2.53085 -1.06871  
 P 2.36245 -0.82301 0.35871  
 P 0.25558 2.01198 0.06243  
 P -2.35262 -0.47999 0.14937  
 C 0.25976 0.54376 -4.09813  
 H -0.06504 1.59231 -4.12645  
 H -0.37612 -0.00985 -4.79915  
 H 1.28882 0.49780 -4.47609  
 C 0.18661 -4.38044 -1.71221  
 H 1.10509 -4.53500 -2.28951  
 H -0.66096 -4.63333 -2.36109  
 H 0.19052 -5.08217 -0.87039  
 C 0.47435 -2.17261 1.32563  
 C -0.20893 -3.12471 2.09849  
 H -1.28418 -3.23044 2.02647  
 C 0.47839 -3.94236 2.99882  
 H -0.08053 -4.66530 3.58745  
 C 1.85864 -3.84204 3.17208  
 H 2.36728 -4.47688 3.89106  
 C 2.57768 -2.92141 2.41219  
 H 3.65236 -2.81023 2.53185  
 C 1.87890 -2.14170 1.49989  
 C 3.19115 -1.65080 -1.06507  
 C 3.56185 -2.99551 -1.00810  
 H 3.41475 -3.55987 -0.09327  
 C 4.08639 -3.62836 -2.13389  
 H 4.35566 -4.67844 -2.08035  
 C 4.25183 -2.92431 -3.32133  
 H 4.65232 -3.42195 -4.19884  
 C 3.89635 -1.57768 -3.38291  
 H 4.01960 -1.02045 -4.30624  
 C 3.36579 -0.94804 -2.26385  
 H 3.08372 0.09878 -2.32146  
 C 3.69634 0.19233 1.11864  
 C 3.52027 0.66496 2.42508  
 H 2.62496 0.40795 2.97913  
 C 4.48741 1.46809 3.01810  
 H 4.33362 1.82701 4.03103  
 C 5.64262 1.80787 2.31837  
 H 6.39839 2.43401 2.78296  
 C 5.82485 1.33822 1.02210  
 H 6.72119 1.59839 0.46772  
 C 4.85747 0.53616 0.42327  
 H 5.01599 0.18083 -0.58889

C 0.15324 0.58532 2.09653  
 C 0.18607 0.16875 3.43787  
 H 0.17418 -0.89136 3.68030  
 C 0.21535 1.10806 4.46873  
 H 0.23029 0.76800 5.50162  
 C 0.21505 2.48212 4.20481  
 H 0.22206 3.19427 5.02436  
 C 0.21343 2.92920 2.88655  
 H 0.21302 3.99241 2.65846  
 C 0.20180 1.97381 1.87208  
 C -0.92077 3.30027 -0.54075  
 C -2.01386 3.66971 0.24662  
 H -2.12601 3.26719 1.24831  
 C -2.97659 4.54333 -0.25277  
 H -3.82241 4.81206 0.37174  
 C -2.86210 5.05350 -1.54107  
 H -3.61769 5.72877 -1.93033  
 C -1.76881 4.69883 -2.32879  
 H -1.66480 5.09980 -3.33235  
 C -0.80333 3.83114 -1.83137  
 H 0.04355 3.56682 -2.45638  
 C 1.88280 2.72015 -0.44186  
 C 2.34288 2.53487 -1.74947  
 H 1.74768 1.97212 -2.46423  
 C 3.56493 3.06434 -2.15378  
 H 3.90508 2.91228 -3.17369  
 C 4.34657 3.77852 -1.25078  
 H 5.30421 4.18495 -1.56081  
 C 3.90111 3.95720 0.05516  
 H 4.51511 4.49241 0.77208  
 C 2.67723 3.43241 0.45858  
 H 2.35530 3.55428 1.48669  
 C -3.36126 0.70024 1.17460  
 C -2.99030 0.92424 2.50512  
 H -2.14421 0.39615 2.92407  
 C -3.67967 1.83685 3.29676  
 H -3.35620 2.00426 4.31922  
 C -4.76325 2.53644 2.77187  
 H -5.29890 3.25576 3.38393  
 C -5.15941 2.30083 1.45889  
 H -6.00899 2.83279 1.04145  
 C -4.46446 1.39186 0.66541  
 H -4.78129 1.24072 -0.35985  
 C -3.16716 -0.21328 -1.50253  
 C -2.74899 0.88161 -2.26547  
 H -1.97095 1.53518 -1.89230  
 C -3.33919 1.17633 -3.48870  
 H -2.99002 2.03547 -4.05252  
 C -4.36357 0.37086 -3.97752  
 H -4.82139 0.58842 -4.93738  
 C -4.80310 -0.71105 -3.22099  
 H -5.61084 -1.33816 -3.58562  
 C -4.21880 -0.99563 -1.98824  
 H -4.59570 -1.82923 -1.40698  
 C -3.07535 -2.11139 0.65434  
 C -2.85696 -3.22849 -0.16090  
 H -2.38189 -3.11364 -1.13089  
 C -3.24919 -4.49895 0.24142  
 H -3.05265 -5.34807 -0.40504  
 C -3.87846 -4.67481 1.47179  
 H -4.17809 -5.66659 1.79530  
 C -4.12726 -3.56949 2.27834  
 H -4.62859 -3.69348 3.23321



|   |          |          |         |
|---|----------|----------|---------|
| C | -3.73222 | -2.29566 | 1.87210 |
| H | -3.93088 | -1.44876 | 2.51902 |

## S-4 References

- (1) O'Leary, N.; Miloserdov, F. M.; Mahon, M. F.; Whittlesey, M. K. Transforming PPh<sub>3</sub> into bidentate phosphine ligands at Ru-Zn heterobimetallic complexes. *Dalton Trans.* **2019**, *48*, 14000-14009.
- (2) Specklin, D.; Fliedel, C.; Gourlaouen, C.; Bruyere, J. C.; Avilés, T.; Boudon, C.; Ruhlmann, L.; Dagorne, S. N-Heterocyclic carbene based tri-organyl-Zn-alkyl cations: Synthesis, structures, and use in CO<sub>2</sub> functionalization. *Chem. Eur. J.* **2017**, *23*, 5509-5519.
- (3) Rit, A. S., T. P.; Maron, L.; Okuda, J. Mixed alkyl hydrido complexes of zinc: Synthesis, structure, and reactivity. *Organometallics* **2014**, *33*, 2039-2047.
- (4) Frisch, M. J.; Trucks, G. W.; Schlegel, H. B.; Scuseria, G. E.; Robb, M. A.; Cheeseman, J. R.; Scalmani, G.; Barone, V.; Petersson, G. A.; Nakatsuji, H.; Li, X.; Caricato, M.; Marenich, A. V.; Bloino, J.; Janesko, B. G.; Gomperts, R.; Mennucci, B.; Hratchian, H. P.; Ortiz, J. V.; Izmaylov, A. F.; Sonnenberg, J. L.; Williams-Young, D.; Ding, F.; Lipparini, F.; Egidi, F.; Goings, J.; Peng, B.; Petrone, A.; Henderson, T.; Ranasinghe, D.; Zakrzewski, V. G.; Gao, J.; Rega, N.; Zheng, G.; Liang, W.; Hada, M.; Ehara, M.; Toyota, K.; Fukuda, R.; Hasegawa, J.; Ishida, M.; Nakajima, T.; Honda, Y.; Kitao, O.; Nakai, H.; Vreven, T.; Throssell, K.; Montgomery, J. A., Jr.; Peralta, J. E.; Ogliaro, F.; Bearpark, M. J.; Heyd, J. J.; Brothers, E. N.; Kudin, K. N.; Staroverov, V. N.; Keith, T. A.; Kobayashi, R.; Normand, J.; Raghavachari, K.; Rendell, A. P.; Burant, J. C.; Iyengar, S. S.; Tomasi, J.; Cossi, M.; Millam, J. M.; Klene, M.; Adamo, C.; Cammi, R.; Ochterski, J. W.; Martin, R. L.; Morokuma, K.; Farkas, O.; Foresman, J. B.; Fox, D. J. *Gaussian16, Revision C.01*, Gaussian, Inc.: Wallingford CT, 2016.
- (5) Andrae, D.; Häußermann, U.; Dolg, M.; Stoll, H.; Preuß, H. Energy-adjusted ab initio pseudopotentials for the second and third row transition elements. *Theor. Chim. Acta* **1990**, *77*, 123-141.

- (6) Hehre, W. J.; Ditchfield, R.; Pople, J. A. Self-consistent molecular orbital methods. XII. Further extensions of Gaussian-type basis sets for use in molecular orbital studies of organic molecules. *J. Chem. Phys.* **1972**, *56*, 2257-2261.
- (7) Hariharan, P. C.; Pople, J. A. The influence of polarization functions on molecular orbital hydrogenation energies. *Theor. Chim. Acta* **1973**, *28*, 213-222.
- (8) Höllwarth, A.; Böhme, M.; Dapprich, S.; Ehlers, A. W.; Gobbi, A.; Jonas, V.; Köhler, K. F.; Stegmann, R.; Veldkamp, A.; Frenking, G. A set of d-polarization functions for pseudo-potential basis sets of the main group elements Al-Bi and f-type polarization functions for Zn, Cd, Hg. *Chem. Phys. Lett.* **1993**, *208*, 237-240.
- (9) Becke, A. D. Density-functional exchange-energy approximation with correct asymptotic behavior. *Phys. Rev. A* **1988**, *38*, 3098-3100.
- (10) Perdew, J. P., Density-functional approximation for the correlation energy of the inhomogeneous electron gas. *Phys. Rev. B* **1986**, *33*, 8822-8824.
- (11) Bader, R. F. W. *Atoms in Molecules: A Quantum Theory*. Clarendon Press: 1994.
- (12) Keith, T. A. *AIMAll (Version 17.11.14)*, TK Gristmill Software: Overland Park KS, USA, 2017.
- (13) Contreras-García, J.; Johnson, E. R.; Keinan, S.; Chaudret, R.; Piquemal, J.-P.; Beratan, D. N.; Yang, W. NCIPLOT: A Program for Plotting Noncovalent Interaction Regions. *J. Chem. Theory Comp.* **2011**, *7*, 625-632.
- (14) Humphrey, W.; Dalke, A.; Schulten, K. VMD: Visual molecular dynamics. *J. Mol. Graph.* **1996**, *14*, 33-38.
- (15) Mitoraj, M. P.; Parafiniuk, M.; Srebro, M.; Handzlik, M.; Buczek, A.; Michalak, A. Applications of the ETS-NOCV method in descriptions of chemical reactions. *J. Mol. Model.* **2011**, *17*, 2337.
- (16) te Velde, G.; Bickelhaupt, F. M.; Baerends, E. J.; Guerra, C. F.; van Gisbergen, S. J. A.; Snijders, J. G.; Ziegler, T. Chemistry with ADF. *J. Comp. Chem.* **2001**, *22*, 931-967.

- (17) [www.chemcraftprog.com](http://www.chemcraftprog.com).
- (18) Perdew, J. P.; Burke, K.; Ernzerhof, M. Generalized gradient approximation made simple. *Phys. Rev. Lett.* **1996**, *77*, 3865-3868.
- (19) Lee, C.; Yang, W.; Parr, R. G. Development of the Colle-Salvetti correlation-energy formula into a functional of the electron density. *Phys. Rev. B* **1988**, *37*, 785-789.
- (20) Grimme, S. Semiempirical GGA-type density functional constructed with a long-range dispersion correction. *J. Comp. Chem.* **2006**, *27*, 1787-1799.
- (21) Tao, J.; Perdew, J. P.; Staroverov, V. N.; Scuseria, G. E. Climbing the density functional ladder: Nonempirical meta-generalized gradient approximation designed for molecules and solids. *Phys. Rev. Lett.* **2003**, *91*, 146401.
- (22) Adamo, C.; Barone, V. Toward reliable density functional methods without adjustable parameters: The PBE0 model. *J. Chem. Phys.* **1999**, *110*, 6158-6170.
- (23) Becke, A. D., Density-functional thermochemistry. III. The role of exact exchange. *J. Chem. Phys.* **1993**, *98*, 5648-5652.
- (24) Chai, J.-D.; Head-Gordon, M. Long-range corrected hybrid density functionals with damped atom-atom dispersion corrections. *Phys. Chem. Chem. Phys.* **2008**, *10*, 6615-6620.
- (25) Zhao, Y.; Truhlar, D. G., The M06 suite of density functionals for main group thermochemistry, thermochemical kinetics, noncovalent interactions, excited states, and transition elements: two new functionals and systematic testing of four M06-class functionals and 12 other functionals. *Theor. Chem. Acc.* **2008**, *120*, 215-241.
- (26) Riddlestone, I. M.; Rajabi, N. A.; Lowe, J. P.; Mahon, M. F.; Macgregor, S. A.; Whittlesey, M. K. Activation of H<sub>2</sub> over the Ru-Zn bond in the transition metal-Lewis acid heterobimetallic species [Ru(IPr)<sub>2</sub>(CO)ZnEt]<sup>+</sup>. *J. Am. Chem. Soc.* **2016**, *138*, 11081-11084.
